# Supplementary material for: Specific Fluorescent Probes for Imaging DNA in Cell-Free Solution and in Mitochondria in Living Cells
Source: MDPI journal article supplement (doi:10.3390/bios13070734), 2023-07-15
Supplement: s1 [file s1]

# Specific Fluorescent Probes for Imaging DNA in Cell-Free Solution and in Mitochondria in Living Cells

Anna S. Efimova, Mariya A. Ustimova, Nelly S. Chmelyuk, Maxim A. Abakumov, Yury V. Fedorov,  
Olga A. Fedorova

## CONTENTS

|                                                                         |    |
|-------------------------------------------------------------------------|----|
| 1. Synthesis of the compounds .....                                     | 2  |
| 2. $^1\text{H}$ and $^{13}\text{C}$ , 2D NMR spectra of compounds ..... | 8  |
| 3. ESI MS studies .....                                                 | 37 |
| 4. Optical studies .....                                                | 40 |
| 5. Cytotoxicity assays .....                                            | 50 |
| 6. Confocal microscopy .....                                            | 51 |

## 1. Synthesis of the compounds

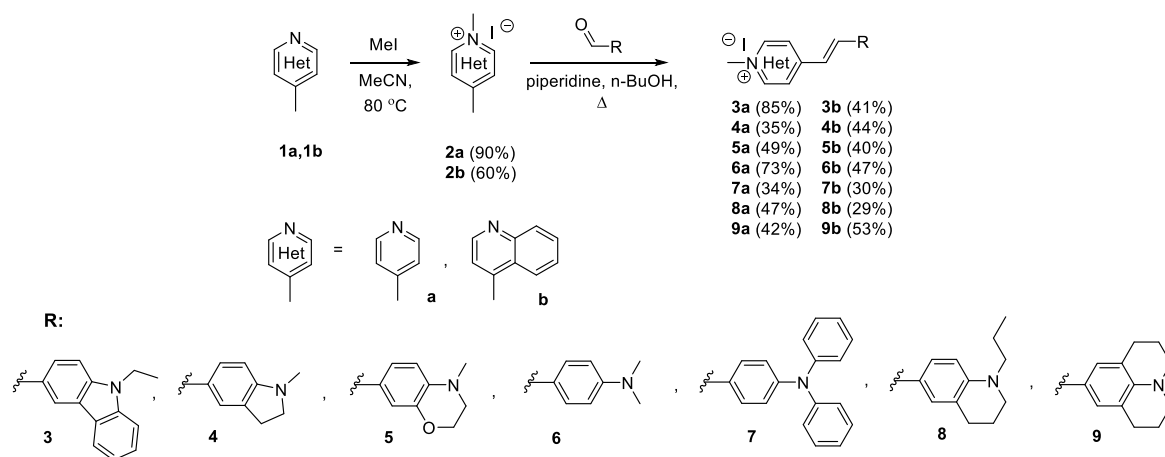

**Figure S1.** Synthetic scheme.

### Apparatus

$^1\text{H}$  and  $^{13}\text{C}$  NMR spectra were recorded on Avance 400 (Bruker) and Inova 400 (Agilent) spectrometers operating at 400.13 MHz (for  $^1\text{H}$ ) and 100.60 MHz (for  $^{13}\text{C}$ ). The chemical shifts were determined with an accuracy of 0.01 ppm relative to residual solvent signals and translated to the internal standard (TMS), and coupling constants were measured with an accuracy of 0.1 Hz. The assignment of  $^1\text{H}$  and  $^{13}\text{C}$  signals was based on 2D NMR experiments (HMBC, HSQC,  $^1\text{H}$  COSY, NOESY), which were performed using standard pulse sequences from the Bruker and Agilent library. The numbering of carbon atoms in the styryl fragments used for the description of the  $^1\text{H}$  NMR spectra is shown on the corresponding structures next to the description of the synthesis.

Melting points were measured on melt-temp melting point electrothermal apparatus and were uncorrected. The reaction course and purity of the final products was followed by TLC on silica gel (DC-Alufolien Kieselgel 60 F 254, Sigma-Aldrich) and aluminum oxide (Aluminium oxide 60 F 254, neutral, Merck). Flash column chromatography was conducted over silica gel (Kieselgel, 40-60  $\mu\text{m}$ , Acros Organics) using a preparative low pressure chromatograph Isolera Prime (Biotage). Preparative TLC was performed on silica gel 60 (Merck) using 20 $\times$ 20 cm plates with a layer thickness of 1 mm. LC-ESI-MS analyses were performed on a Shimadzu LCMS-2020, using methanol (Panreac, HPLC-gradient grade) as the mobile phase.

Elemental analyses were carried out in the Microanalysis Laboratory of the A.N. Nesmeyanov Institute of Organoelement Compounds. Starting compounds and reagents were obtained from commercial sources (Sigma Aldrich, Merck) and were used without any further purification.

### Synthetic procedures and characterization data

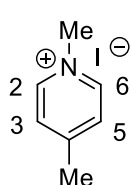

#### *1,4-dimethylpyridin-1-ium iodide (1a)*

**1a** was synthesized according to the literature [21]. Beige solid. Yield 90%. M.p. 146-148  $^{\circ}\text{C}$ .  $^1\text{H}$  NMR (400 MHz, DMSO- $d_6$ ,  $\delta$  ppm.,  $J$  Hz): 2.59 (s, 3H, -CH $_3$ ), 4.26 (s, 3H, N $^+$ -CH $_3$ ), 7.95 (d, 2H, H-3,5,  $J$  = 6.3), 8.82 (d, 2H, H-2,6,  $J$  = 6.3) [45].

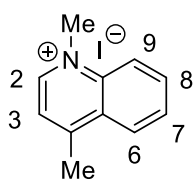

**1,4-dimethylquinolin-1-ium iodide (1b)**

**1b** was synthesized according to the literature [21]. Yellow powder. Yield 60%. M.p. 167-168 °C. <sup>1</sup>H NMR (400 MHz, DMSO-*d*<sub>6</sub>, δ ppm., *J* Hz): 3.00 (s, 3H, -CH<sub>3</sub>), 4.57 (s, 3H, N<sup>+</sup>-CH<sub>3</sub>), 8.13 – 7.98 (m, 2H, H-3,7), 8.27 (t, 1H, H-8, *J* = 7.9), 8.49 (d, 1H, H-9, *J* = 8.9), 8.54 (d, 1H, H-6, *J* = 8.4), 9.35 (d, 1H, H-2, *J* = 6.0) [46].

**General procedure for the synthesis of compounds 3a-9b**

To a stirring mixture of **1a** or **1b** (1 eqv.), corresponding aldehyde (1 eqv.) and *n*-BuOH, the piperidine (0,2 eqv.), was added. The mixture was refluxed for 10 hours. Then, the solvent was removed in vacuum. Addition of methanol precipitated products **3a-9a**. The precipitates were filtered off and washed with hexane and diethyl ether. The products **3b-9b** were purified with flash column chromatography using CH<sub>2</sub>Cl<sub>2</sub>/methanol as the eluent.

**(E)-4-(2-(9-ethyl-9H-carbazol-3-yl)vinyl)-1-methylpyridin-1-ium iodide (3a)**

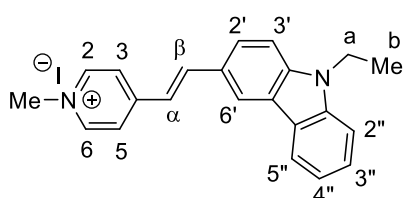

Yellow powder. Yield 85%. M.p. 290-292 °C. <sup>1</sup>H NMR (400 MHz, DMSO-*d*<sub>6</sub>, δ ppm., *J* Hz): 1.34 (t, 3H, H-b, *J* = 6.9), 4.23 (s, 3H, N<sup>+</sup>-CH<sub>3</sub>), 4.50 (q, 2H, H-a, *J* = 6.6), 7.29 (t, 1H, H-3'', *J* = 7.4), 7.53 (m, 2H, H-α,4''), 7.68 (d, 1H, H-2'', *J* = 8.2), 7.75 (d, 1H, H-3', *J* = 8.5), 7.90 (d, 1H, H-2', *J* = 8.6), 8.20 (m, 4H, H-β,3,5,5''), 8.59 (s, 1H, H-6'), 8.80 (d, 2H, H-2,6, *J* = 6.2). <sup>13</sup>C NMR (101 MHz, DMSO-*d*<sub>6</sub>, δ ppm., *J* Hz): 13.80 (C-b), 37.25 (C-a), 46.66 (N<sup>+</sup>-CH<sub>3</sub>), 109.70 (C-2''), 109.84 (C-3'), 119.66 (C-4''), 119.89 (C-α), 120.53 (C-5''), 121.20 (C-6'), 122.12 (C-6''), 122.72 (C-3,5,5'), 126.22 (C-1'), 126.31 (C-2'), 126.44 (C-3''), 140.10 (C-1''), 140.90 (C-4'), 142.27 (C-β), 144.69 (C-2,6), 153.03 (C-4) [47]. ESI-MS **3a** in MeOH, *m/z*: calcd. 313.17; found 313.00 [M]<sup>+</sup>. Anal. calcd. for C<sub>22</sub>H<sub>21</sub>I<sup>+</sup>N<sub>2</sub><sup>+</sup>: C, 60.01 %; H, 4.81 %; N, 6.36 %; found: C, 60.21%; H, 4.85%; N, 6.32%.

**(E)-1-methyl-4-(2-(1-methylindolin-5-yl)vinyl)pyridin-1-ium iodide (4a)**

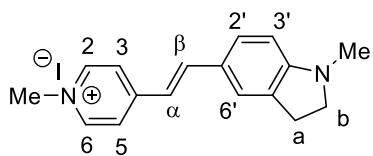

Red solid. Yield 35%. M.p. 209-211 °C. <sup>1</sup>H NMR (400 MHz, DMSO-*d*<sub>6</sub>, δ ppm., *J* Hz): 2.82 (s, 3H, N-CH<sub>3</sub>), 2.98 (t, 2H, H-a, *J* = 8.2), 3.46 (t, 2H, H-b *J* = 8.2), 4.16 (s, 3H, N<sup>+</sup>-CH<sub>3</sub>), 6.53 (d, 1H, H-3', *J* = 8.2), 7.13 (d, 1H, H-α, *J*<sub>trans</sub> = 16.0), 7.39 (d, 1H, H-2', *J* = 8.2 Hz), 7.49 (s, 1H, H-6'), 7.88 (d, 1H, H-β, *J*<sub>trans</sub> = 16.0), 8.00 (d, 2H, H-3,5, *J* = 6.6), 8.66 (d, 2H, H-2,6, *J* = 6.6). <sup>13</sup>C NMR (101 MHz, DMSO-*d*<sub>6</sub>, δ ppm., *J* Hz): 27.24 (C-a), 34.17 (N-CH<sub>3</sub>), 46.30 (N<sup>+</sup>-CH<sub>3</sub>), 54.50 (C-b), 105.73 (C-3'), 116.58 (C-α), 121.95 (C-3,5), 123.21 (C-6'), 123.91 (C-1'), 130.92 (C-5'), 131.26 (C-2'), 142.27 (C-β), 144.25 (C-2,6), 153.41 (C-4), 155.49 (C-4'). ESI-MS **4a** in MeOH, *m/z*: calcd. 251.15; found 251.00 [M]<sup>+</sup>. Anal. calcd. for C<sub>17</sub>H<sub>19</sub>I<sup>+</sup>N<sub>2</sub><sup>+</sup>: C, 53.98 %; H, 5.06 %; N, 7.41 %; found C, 52.58 %; H, 5.00 %; N, 7.03 %.

**(E)-1-methyl-4-(2-(4-methyl-3,4-dihydro-2H-benzo[b][1,4]oxazin-7-yl)vinyl)pyridin-1-ium iodide (5a)**

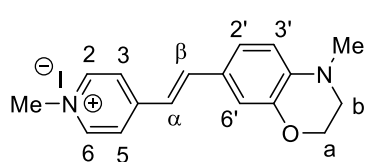

Red solid. Yield 49%. M.p. 253-254 °C.  $^1\text{H}$  NMR (400 MHz,  $\text{DMSO-}d_6$ ,  $\delta$  ppm.,  $J$  Hz): 2.95 (s, 3H, N- $\text{CH}_3$ ), 3.38 (m, 2H, H-b), 4.17 (s, 3H,  $\text{N}^+\text{-CH}_3$ ), 4.23 (m, 2H, H-a), 6.75 (d, 1H, H-3',  $J = 8.5$ ), 7.16 (m, 3H, H- $\alpha$ , 2', 6'), 7.84 (d, 1H, H- $\beta$ ,  $J_{\text{trans}} = 16.0$ ), 8.03 (d, 2H, H-3,5,  $J = 6.4$ ), 8.70 (d, 2H, H-2,6,  $J = 6.4$ ).  $^{13}\text{C}$  NMR (101 MHz,  $\text{DMSO-}d_6$ ,  $\delta$  ppm.,  $J$  Hz): 37.91 (N- $\text{CH}_3$ ), 46.50 ( $\text{N}^+\text{-CH}_3$ ), 48.11 (C-b), 64.01 (C-a), 111.63 (C-3'), 113.95 (C-2'), 118.13 (C- $\alpha$ ), 122.34 (C-3,5), 124.03 (C-1'), 124.33 (C-6'), 139.39 (C-4'), 141.66 (C- $\beta$ ), 143.56 (C-5'), 144.48 (C-2,6), 153.22 (C-4). ESI-MS **5a** in MeOH,  $m/z$ : calcd. 267.15; found 267.00  $[\text{M}]^+$ . Anal. calcd. for  $\text{C}_{17}\text{H}_{19}\text{I}\text{N}_2^+\text{O}$ : C, 51.79 %; H, 4.86 %; N, 7.11 %; found C, 52.03 %; H, 4.95 %; N, 7.42 %.

**(E)-4-(4-(dimethylamino)styryl)-1-methylpyridin-1-ium iodide (6a, DASPI)**

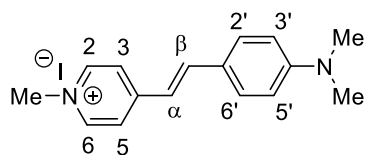

Crimson powder. Yield 73%. M.p. 252-254 °C.  $^1\text{H}$  NMR (400 MHz,  $\text{DMSO-}d_6$ ,  $\delta$  ppm.,  $J$  Hz): 3.01 (s, 6H, N-( $\text{CH}_3$ )<sub>2</sub>), 4.18 (s, 3H,  $\text{N}^+\text{-CH}_3$ ), 6.78 (d, 2H, H-3',5',  $J = 8.8$ ), 7.17 (d, 1H, H- $\alpha$ ,  $J_{\text{trans}} = 16.1$ ), 7.60 (d, 2H, H-2',6',  $J = 8.8$ ), 7.91 (d, 1H, H- $\beta$ ,  $J = 16.1$ ), 8.05 (d, 2H, H-3,5,  $J = 6.8$ ), 8.69 (d, 2H, H-2,6,  $J = 6.8$ ).  $^{13}\text{C}$  NMR (101 MHz,  $\text{DMSO-}d_6$ ,  $\delta$  ppm.,  $J$  Hz): 39.52 (N-( $\text{CH}_3$ )<sub>2</sub>), 46.37 ( $\text{N}^+\text{-CH}_3$ ), 111.93 (C-3',5'), 117.10 (C- $\alpha$ ), 122.10 (C-3,5), 122.45 (C-1'), 130.12 (C-2',6'), 141.86 (C- $\beta$ ), 144.31 (C-2,6), 151.84 (C-4'), 153.34 (C-4) [48].  
Anal. calcd. for  $\text{C}_{16}\text{H}_{19}\text{I}\text{N}_2^+$ : C, 52.47 %; H, 5.23 %; N, 7.65 %; found C, 52.05 %; H, 5.11 %; N, 7.34 %.

**(E)-4-(4-(diphenylamino)styryl)-1-methylpyridin-1-ium iodide (7a)**

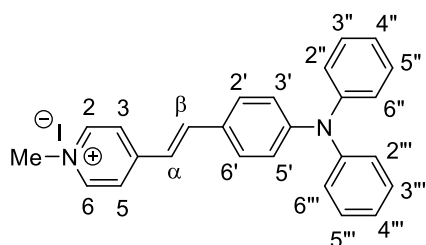

Crimson powder. Yield 34%. M.p. 286-288 °C.  $^1\text{H}$  NMR (400 MHz,  $\text{DMSO-}d_6$ ,  $\delta$  ppm.,  $J$  Hz): 4.21 (s, 3H,  $\text{N}^+\text{-CH}_3$ ), 6.95 (d, 2H, H-3',5',  $J = 8.6$ ), 7.12 (d, 4H, H-2'',6'',2''',6''',  $J = 8.3$ ), 7.17 (t, 2H, H-4'',4''',  $J = 7.4$ ), 7.30 (d, 1H, H- $\alpha$ ,  $J_{\text{trans}} = 16.2$ ), 7.38 (t, 4H, H-3'',5'',3''',5''',  $J = 7.7$ ), 7.62 (d, 2H, H-2',6',  $J = 8.6$ ), 7.94 (d, 1H, H- $\beta$ ,  $J_{\text{trans}} = 16.2$ ), 8.14 (d, 2H, H-3,5,  $J = 6.5$ ), 8.78 (d, 2H, H-2,6,  $J = 6.5$ ).  $^{13}\text{C}$  NMR (101 MHz,  $\text{DMSO-}d_6$ ,  $\delta$  ppm.,  $J$  Hz): 46.69 ( $\text{N}^+\text{-CH}_3$ ), 120.45 (C- $\alpha$ ), 120.69 (C-3',5'), 122.89 (C-3,5), 124.48 (C-4'',4'''), 125.38 (C-2'',6'',2''',6'''), 127.98 (C-1'), 129.66 (C-2',6'), 129.84 (C-3'',5'',3''',5'''), 140.47 (C- $\beta$ ), 144.77 (C-2,6), 146.19 (C-1'',1'''), 149.42 (C-4'), 152.79 (C-4) [49]. ESI-MS **7a** in MeOH,  $m/z$ : calcd. 363.19; found 362.95  $[\text{M}]^+$ . Anal. calcd. For  $\text{C}_{26}\text{H}_{23}\text{I}\text{N}_2^+$ : C, 63.68 %; H, 4.73 %; N, 5.71 %; found C, 63.73 %; H, 4.80 %; N, 5.73 %.

**(E)-1-methyl-4-(2-(1-propyl-1,2,3,4-tetrahydroquinolin-6-yl)vin)pyridin-1-ium iodide (8a)**

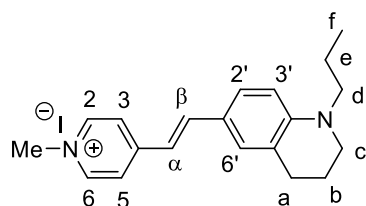

Crimson solid. Yield 47%. M.p. 210-212 °C.  $^1\text{H}$  NMR (400 MHz,  $\text{DMSO-}d_6$ ,  $\delta$  ppm.,  $J$  Hz): 0.91 (t, 3H, H-f,  $J = 7.1$ ), 1.87 (m, 2H, H-e), 2.72 (m, 2H, H-a), 3.29 (m, 2H, H-d), 3.36 (m, 2H, H-c), 4.15 (s, 3H,  $\text{N}^+\text{-CH}_3$ ), 6.65 (d, 2H, H-3',  $J = 8.9$ ), 7.07 (d, 1H, H- $\alpha$ ,  $J_{\text{trans}} = 16.1$ ), 7.35 (m, 2H, H-2',6',  $J = 8.9$ ), 7.83 (d, 1H, H- $\beta$ ,  $J_{\text{trans}} = 16.1$ ), 7.99 (d, 2H, H-3,5,  $J = 6.3$ ), 8.63 (d, 2H, H-2,6,  $J = 6.3$ ).  $^{13}\text{C}$  NMR (101 MHz,  $\text{DMSO-}d_6$ ,  $\delta$  ppm.,  $J$  Hz): 11.23 (C-f), 19.13 (C-e), 21.20 (C-b), 27.51 (C-a), 46.22



(N<sup>+</sup>-CH<sub>3</sub>), 49.00 (C-c), 52.08 (C-d), 110.20 (C-3'), 116.08 (C-α), 121.65 (C-1'), 121.79 (C-3,5), 121.92 (C-5'), 128.90 (C-2'), 129.39 (C-6'), 142.14 (C-β), 144.15 (C-2,6), 147.63 (C-4'), 153.42 (C-4). ESI-MS **8a** in MeOH, m/z: calcd. 293.20; found 293.015 [M]<sup>+</sup>. Anal. calcd. for C<sub>20</sub>H<sub>25</sub>I<sup>+</sup>N<sub>2</sub><sup>+</sup>: C, 57.15 %; H, 6.00 %; N, 6.66 %; found C, 57.10 %; H, 6.04 %; N, 6.89 %.

**(E)-1-methyl-4-(2-(2,3,6,7-tetrahydro-1H,5H-pyrido[3,2,1-ij]quinolin-9-yl)vinyl)pyridin-1-ium iodide (9a)**

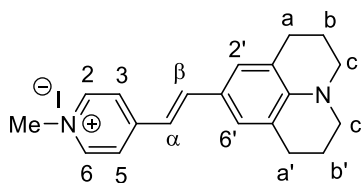

Crimson solid. Yield 42%. M.p. 233-235 °C. <sup>1</sup>H NMR (300 MHz, DMSO-*d*<sub>6</sub>, δ ppm., *J* Hz): 1.87 (m, 4H, H-b,b'), 2.70 (t, 4H, H-a,a', *J* = 5.8), 3.26 (m, 4H, H-c,c'), 4.13 (s, 3H, N<sup>+</sup>-CH<sub>3</sub>), 7.04 (d, 1H, H-α, *J*<sub>trans</sub> = 15.8), 7.15 (s, 2H, H-2',6'), 7.78 (d, 1H, H-β, *J*<sub>trans</sub> = 15.8), 7.95 (d, 2H, H-3,5, *J* = 6.7), (d, 2H, H-2,6, *J* = 6.6).

<sup>13</sup>C NMR (101 MHz, DMSO-*d*<sub>6</sub>, δ ppm., *J* Hz): 20.98 (C-b,b'), 27.14 (C-a,a'), 46.21 (N<sup>+</sup>-CH<sub>3</sub>), 49.29 (C-c,c'), 115.85 (C-α), 120.74 (3',5'), 121.38 (C-1'), 121.68 (C-3,5), 127.86 (C-2',6'), 142.32 (C-β), 144.13 (C-2,6), 145.20 (C-4'), 153.41 (C-4) [50]. ESI-MS **9a** in MeOH, m/z: calcd. 291.19; found 291.00 [M]<sup>+</sup>. Anal. calcd. for C<sub>20</sub>H<sub>23</sub>I<sup>+</sup>N<sub>2</sub><sup>+</sup>: C, 57.42 %; H, 5.54 %; N, 6.70 %; found C, 57.09 %; H, 5.50 %; N, 6.65 %.

**(E)-4-(2-(9-ethyl-9H-carbazol-3-yl)vinyl)-1-methylquinolin-1-ium iodide (3b)**

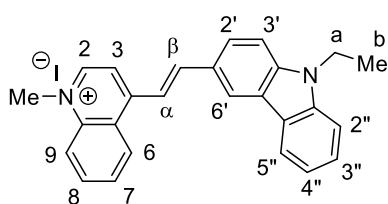

Red powder. Yield 41%. T.d. 289 °C. <sup>1</sup>H NMR (400 MHz, DMSO-*d*<sub>6</sub>, δ ppm., *J* Hz): 1.36 (t, 3H, H-b, *J* = 7.2), 4.50 (s, 5H, H-a, N<sup>+</sup>-CH<sub>3</sub>), 7.31 (t, 1H, H-4'', *J* = 7.4), 7.54 (t, 1H, H-3'', *J* = 7.6), 7.69 (d, 1H, H-2'', *J* = 8.1), 7.76 (d, 1H, H-3', *J* = 8.5), 8.06 (t, 1H, H-7, *J* = 8.5), 8.13 (d, 1H, H-2', *J* = 8.5), 8.26 (m, 2H, H-5'',8), 8.40 (m, 3H, H-β,9,α), 8.49 (d, 1H, H-3 *J* = 6.4),

8.86 (s, 1H, H-6'), 9.12 (1H, H-6, *J* = 8.5), 9.27 (d, 1H, H-2, *J* = 6.4). <sup>13</sup>C NMR (101 MHz, DMSO-*d*<sub>6</sub>, δ ppm., *J* Hz): 13.86 (C-b), 37.32 (C-a), 44.44 (N<sup>+</sup>-CH<sub>3</sub>), 109.85 (C-2'',3'), 115.11 (C-3), 116.18 (C-α), 119.31 (C-9), 119.82 (C-4''), 120.62 (C-5''), 121.93 (C-6'), 122.29 (C-6''), 122.88 (C-5'), 126.12 (C-6), 26.48 (C-3''), 26.57 (C-5), 126.71 (C-1'), 127.57 (C-2'), 128.98 (C-7), 134.89 (C-8), 138.84 (C-10), 140.22 (C-1''), 141.28 (C-4'), 144.92 (C-β), 147.57 (C-2), 153.04 (C-4) [51]. ESI-MS **3b** in MeOH, m/z: calcd. 363.19; found 363.35 [M]<sup>+</sup>. Anal. calcd. For C<sub>26</sub>H<sub>23</sub>I<sup>+</sup>N<sub>2</sub><sup>+</sup>: C, 63.68 %; H, 4.73 %; N, 5.71 %; found C, 63.75 %; H, 4.80 %; N, 5.75 %.

**(E)-1-methyl-4-(2-(1-methylindolin-5-yl)vinyl)quinolin-1-ium iodide (4b)**

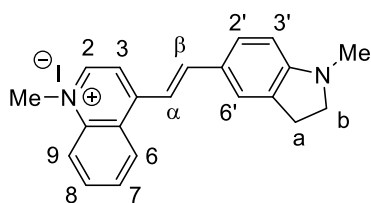

Dark solid. Yield 44%. M.p. 215-216 °C. <sup>1</sup>H NMR (400 MHz, DMSO-*d*<sub>6</sub>, δ ppm., *J* Hz): 2.88 (s, 3H, N-CH<sub>3</sub>), 3.03 (t, 2H, H-a, *J* = 8.2), 3.54 (t, 2H, H-b, *J* = 8.2), 4.41 (s, 3H, N<sup>+</sup>-CH<sub>3</sub>), 6.57 (d, 1H, H-3', *J* = 8.2), 7.59 (d, 1H, H-2', *J* = 8.3), 7.85 (s, 1H, H-6'), 7.95 (m, 2H, H-α,7), 8.17 (m, 2H, H-β,8), 8.30 (m, 2H, H-3,9), 9.01 (d, 1H, H-6, *J* = 8.4), 9.06 (d, 1H, H-2, *J* = 6.6). <sup>13</sup>C NMR (101 MHz, DMSO-*d*<sub>6</sub>, δ ppm., *J* Hz): 27.16 (C-a), 33.96 (N-CH<sub>3</sub>), 43.96 (N<sup>+</sup>-CH<sub>3</sub>), 54.42 (C-b), 105.60 (C-3'), 112.33 (C-α), 113.57 (C-3), 118.98 (C-9), 124.20 (C-6'), 124.51 (C-1'), 125.73 (C-5), 126.30 (C-6), 128.48 (C-7), 131.14 (C-5'), 133.16 (C-2'), 134.61 (C-8), 138.84 (C-10), 145.12 (C-β), 146.55

(C-2), 153.18 (C-4), 156.06 (C-4'). ESI-MS **4b** in MeOH,  $m/z$ : calcd. 301.17; found 301.00  $[M]^+$ . Anal. calcd. for  $C_{21}H_{21}IN_2^+$ : C, 58.89 %; H, 4.94 %; N, 6.54 %; found C, 58.73 %; H, 4.80 %; N, 6.47 %.

**(E)-1-methyl-4-(2-(4-methyl-3,4-dihydro-2H-benzo[b][1,4]oxazin-7-yl)vinyl)quinolin-1-ium iodide (5b)**

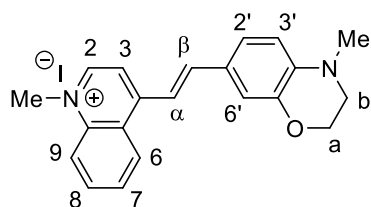

Dark solid. Yield 40%. M.p. 264-265 °C.  $^1H$  NMR (400 MHz, DMSO- $d_6$ ,  $\delta$  ppm.,  $J$  Hz): 3.00 (s, 3H, N-CH<sub>3</sub>), 3.44 (m, 2H, H-b), 4.25 (m, 2H, H-a), 4.45 (m, 3H, N<sup>+</sup>-CH<sub>3</sub>), 6.78 (d, 1H, H-3',  $J$  = 8.3), 7.40 (d, 1H, H-2',  $J$  = 8.3), 7.52 (s, 1H, H-6'), 7.96 (m, 2H, H- $\alpha$ ,7), 8.11 (d, 1H, H- $\beta$ ,  $J_{trans}$  = 15.7), 8.20 (t, 1H, H-8,  $J$  = 7.9), 8.33 (m, 2H, H-3,9), 9.05 (d, 1H, H-6,  $J$  = 8.4), 9.13 (d, 1H, H-2,  $J$  = 6.5).  $^{13}C$  NMR (101 MHz, DMSO- $d_6$ ,  $\delta$  ppm.,  $J$  Hz): 37.83 (N-CH<sub>3</sub>), 44.05 (N<sup>+</sup>-CH<sub>3</sub>), 48.11 (C-b), 63.79 (C-a), 111.30 (C-3'), 114.03 (C-3), 114.13 (C- $\alpha$ ), 114.61 (C-6'), 119.00 (C-9), 124.45 (C-5), 125.82 (C-1'), 125.88 (C-2'), 126.43 (C-6), 128.57 (C-7), 134.61 (C-8), 138.75 (C-10), 139.90 (C-4'), 143.48 (C-5'), 144.40 (C- $\beta$ ), 146.86 (C-2), 153.00 (C-4). ESI-MS **5b** in MeOH,  $m/z$ : calcd. 317.16; found 317.30  $[M]^+$ . Anal. calcd. for  $C_{21}H_{21}IN_2^+O$ : C, 56.77; H, 4.76 %; N, 6.30 %; found C, 56.93; H, 4.86 %; N, 6.31 %.

**(E)-4-(4-(dimethylamino)styryl)-1-methylquinolin-1-ium iodide (6b)**

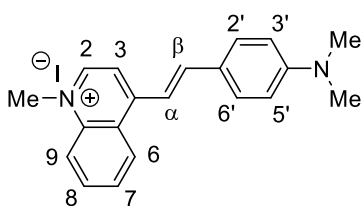

Blue solid. Yield 47%. M.p. 260-262 °C.  $^1H$  NMR (400 MHz, DMSO- $d_6$ ,  $\delta$  ppm.,  $J$  Hz): 3.07 (s, 6H, N-(CH<sub>3</sub>)<sub>2</sub>), 4.44 (s, 3H, N<sup>+</sup>-CH<sub>3</sub>), 6.82 (d, 2H, H-3',5',  $J$  = 8.8), 7.87 (d, 2H, H-2',6',  $J$  = 8.8), 7.96 (d, 1H, H-7,  $J$  = 7.7), 8.01 (d, 1H, H- $\alpha$ ,  $J$  = 15.1), 8.18 (m, 2H, H- $\beta$ ,8), 8.33 (m, 2H, H-3,9), 9.03 (d, 1H, H-6,  $J$  = 8.6), 9.11 (d, 1H, H-2,  $J$  = 6.7).  $^{13}C$  NMR (101 MHz, DMSO- $d_6$ ,  $\delta$  ppm.,  $J$  Hz): 39.10 (N(CH<sub>3</sub>)<sub>2</sub>), 44.04 (N<sup>+</sup>-CH<sub>3</sub>), 111.91 (C-3',5'), 113.11 (C- $\alpha$ ), 113.94 (C-3), 119.06 (C-9), 123.06 (C-5), 125.76 (C-6), 126.36 (C-1'), 128.56 (C-7), 131.36 (C-2',6'), 134.62 (C-8), 138.80 (C-10), 144.70 (C- $\beta$ ), 146.78 (C-2), 152.30 (C-4'), 153.16 (C-4) [52]. Anal. calcd. for  $C_{20}H_{21}IN_2^+$ : C, 57.70 %; H, 5.08 %; N, 6.73 %; found C, 57.65 %; H, 5.00 %; N, 6.64 %.

**(E)-4-(4-(diphenylamino)styryl)-1-methylquinolin-1-ium iodide (7b)**

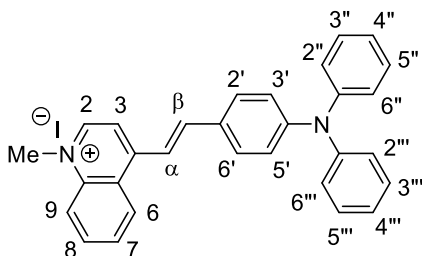

Dark powder. Yield 30%. M.p. 182-184 °C.  $^1H$  NMR (600 MHz, DMSO- $d_6$ ,  $\delta$  ppm.,  $J$  Hz): 4.52 (s, 3H, N<sup>+</sup>-CH<sub>3</sub>), 6.96 (d, 2H, H-3',5',  $J$  = 8.8), 7.15 (d, 4H, H-2'',6'',2''',6''',  $J$  = 7.6), 7.18 (t, 2H, H-4'',4''',  $J$  = 7.6), 7.40 (t, 4H, H-3'',5'',3''',5''',  $J$  = 7.9), 7.90 (d, 2H, H-2',6',  $J$  = 8.8), 8.02 (t, 1H, H-7,  $J$  = 7.8), 8.17 (s, 2H, H- $\alpha$ , $\beta$ ), 8.24 (t, 1H, H-8,  $J$  = 8.4), 8.41 (d, 1H, H-9,  $J$  = 8.8), 8.47 (d, 1H, H-3,  $J$  = 6.7), 9.03 (d, 1H, H-6,  $J$  = 7.8), 9.32 (d, 1H, H-2,  $J$  = 6.7).  $^{13}C$  NMR (151 MHz, DMSO- $d_6$ ,  $\delta$  ppm.,  $J$  Hz): 44.46 (N<sup>+</sup>-CH<sub>3</sub>), 115.38 (C-3), 116.94 (C- $\alpha$ ), 119.36 (C-9), 120.47 (C-3',5'), 124.71 (C-4'',4'''), 125.55 (C-2'',6'',2''',6'''), 126.15 (C-6), 126.44 (C-5), 128.48 (C-1'), 129.07 (C-7), 129.94 (C-3'',5'',3''',5'''), 130.64 (C-2',6'), 134.89 (C-8), 138.83 (C-10), 142.98 (C- $\beta$ ), 146.15

(C-1'',1'''), 147.72 (C-2), 149.82 (C-4'), 152.79 (C-4) [53]. Anal. calcd. for C<sub>30</sub>H<sub>25</sub>I<sup>+</sup>N<sub>2</sub><sup>+</sup>: C, 66.67 %; H, 4.66 %; N, 5.18 %; found C, 66.44 %; H, 4.31 %; N, 5.23 %.

**(E)-1-methyl-4-(2-(1-propyl-1,2,3,4-tetrahydroquinolin-6-yl)vinyl)quinolin-1-ium iodide (8b)**

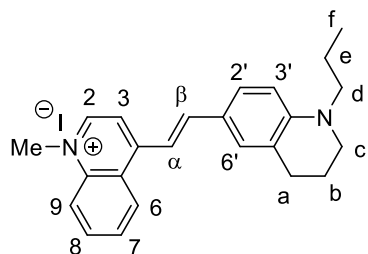

Dark solid. Yield 29%. M.p. 180-182 °C. <sup>1</sup>H NMR (600 MHz, DMSO-*d*<sub>6</sub>, δ ppm., *J* Hz): 0.92 (t, 3H, H-f, *J* = 7.4), 1.58 (h, 2H, H-e, *J* = 7.4), 1.88 (p, 2H, H-b, *J* = 6.4), 2.76 (t, 2H, H-a, *J* = 6.1), 3.33 (d, 2H, H-d, *J* = 7.9), 3.40 (d, 2H, H-c, *J* = 6.3), 4.39 (s, 3H, N<sup>+</sup>-CH<sub>3</sub>), 6.69 (d, 1H, H-3', *J* = 8.8), 7.58 (d, 1H, H-2', *J* = 8.4), 7.67 (s, 1H, H-6'), 7.90 (d, 1H, H-α, *J*<sub>trans</sub> = 15.5), 7.94 (t, 1H, H-7, *J* = 7.7), 8.10 (d, 1H, H-β, *J*<sub>trans</sub> = 15.5), 8.17 (t, 1H, H-8, *J* = 8.3), 8.25 (d, 1H, H-3, *J* = 6.8), 8.29 (d, 1H, H-9, *J* = 8.8), 8.98 (d, 1H, H-6, *J* = 8.9), 9.00 (d, 1H, H-2, *J* = 6.8). <sup>13</sup>C NMR (151 MHz, DMSO-*d*<sub>6</sub>, δ ppm., *J* Hz): 11.71 (C-f), 19.70 (C-e), 21.60 (C-b), 27.95 (C-a), 44.30 (N<sup>+</sup>-CH<sub>3</sub>), 49.62 (C-c), 52.58 (C-d), 110.69 (C-3'), 112.35 (C-α), 113.76 (C-3), 119.38 (C-9), 122.66 (C-5'), 122.82 (C-1'), 126.04 (C-6), 126.67 (C-5), 128.84 (C-7), 130.21 (C-6'), 131.56 (C-2'), 134.98 (C-8), 139.24 (C-10), 145.43 (C-β), 146.84 (C-2), 148.79 (C-4'), 153.49 (C-4). ESI-MS **8b** in MeOH, *m/z*: calcd. 343.22; found 343.00 [M]<sup>+</sup>. Anal. calcd. for C<sub>24</sub>H<sub>27</sub>I<sup>+</sup>N<sub>2</sub><sup>+</sup>: C, 61.28 %; H, 5.79 %; N, 5.96 %; found C, 60.98 %; H, 5.81 %; N, 5.89 %.

**(E)-1-methyl-4-(2-(2,3,6,7-tetrahydro-1H,5H-pyrido[3,2,1-ij]quinolin-9-yl)vinyl)quinolin-1-ium iodide (9b)**

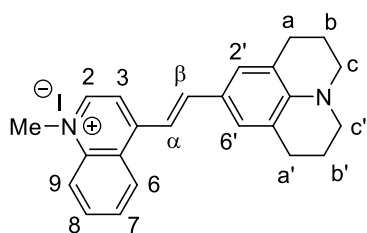

Dark solid. Yield 53%. M.p. 233-234 °C. <sup>1</sup>H NMR (400 MHz, DMSO-*d*<sub>6</sub>, δ ppm., *J* Hz): 1.89 (p, 4H, H-b,b', *J* = 6.3), 2.74 (t, 4H, H-a,a', *J* = 6.1), 3.31 (t, 4H, H-c,c', *J* = 5.9), 4.38 (s, 3H, N<sup>+</sup>-CH<sub>3</sub>), 7.45 (s, 2H, H-2',6'), 7.87 (d, 1H, H-α, *J*<sub>trans</sub> = 15.6), 7.92 (t, 1H, H-7, *J* = 7.7), 8.08 (d, 1H, H-β, *J*<sub>trans</sub> = 15.6), 8.16 (t, 1H, H-8, *J* = 7.8), 8.23 (d, 1H, H-3, *J* = 6.8), 8.28 (d, 1H, H-9, *J* = 8.9), 8.98 (d, 1H, H-6, *J* = 8.9), 9.01 (d, 1H, H-2, *J* = 6.9). <sup>13</sup>C NMR (101 MHz, DMSO-*d*<sub>6</sub>, δ ppm., *J* Hz): 21.33 (C-b,b'), 27.53 (C-a,a'), 44.11 (N<sup>+</sup>-CH<sub>3</sub>), 49.85 (C-c,c'), 111.97 (C-α), 113.46 (C-3), 119.31 (C-9), 121.32 (C-3',5'), 122.50 (C-1'), 125.97 (C-5), 126.65 (C-6), 128.65 (C-7), 129.55 (C-2',6'), 134.85 (C-7), 139.25 (C-10), 145.67 (C-β), 146.42 (C-4'), 146.68 (C-2), 153.38 (C-4) [54]. ESI-MS **9b** in MeOH, *m/z*: calcd. 341.20; found 341.00 [M]<sup>+</sup>. Anal. calcd. for C<sub>24</sub>H<sub>25</sub>I<sup>+</sup>N<sub>2</sub><sup>+</sup>: C, 61.54 %; H, 5.38 %; N, 5.98 %; found C, 61.32 %; H, 5.56 %; N, 5.84 %.

## 2.<sup>1</sup>H and <sup>13</sup>C, 2D NMR spectra of compounds

### *1,4-dimethylpyridin-1-ium iodide (1a) in DMSO-d<sub>6</sub>*

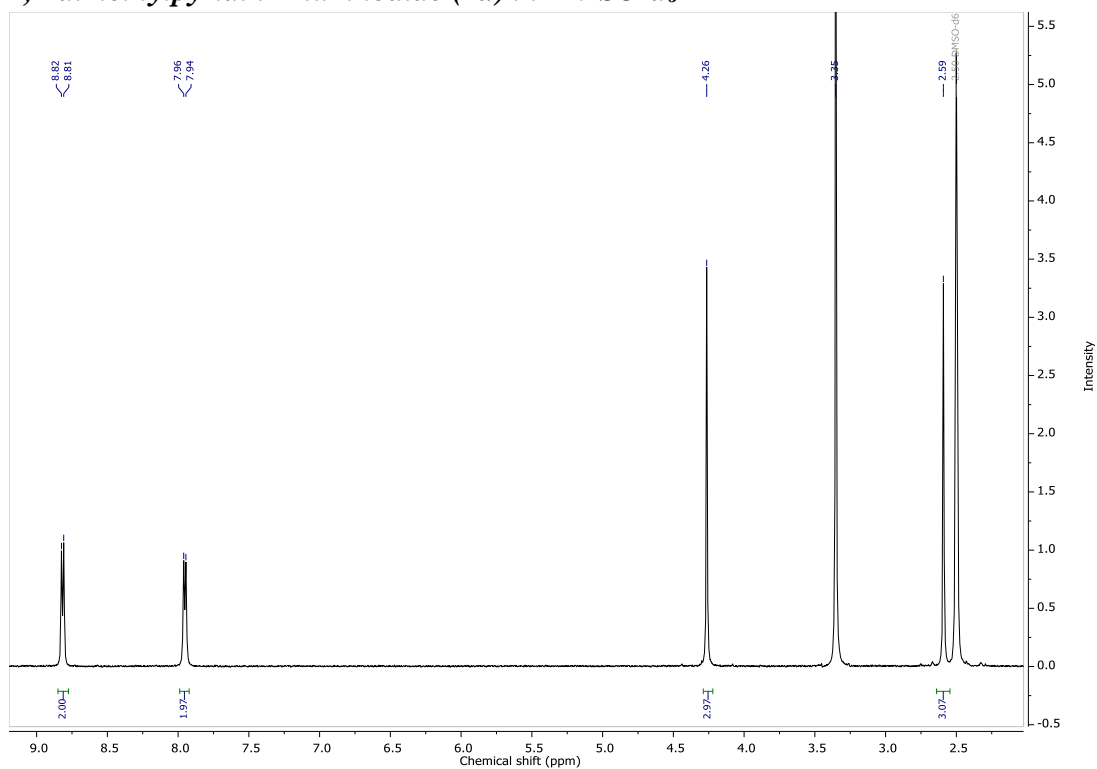

### *1,4-dimethylquinolin-1-ium iodide (1b) in DMSO-d<sub>6</sub>*

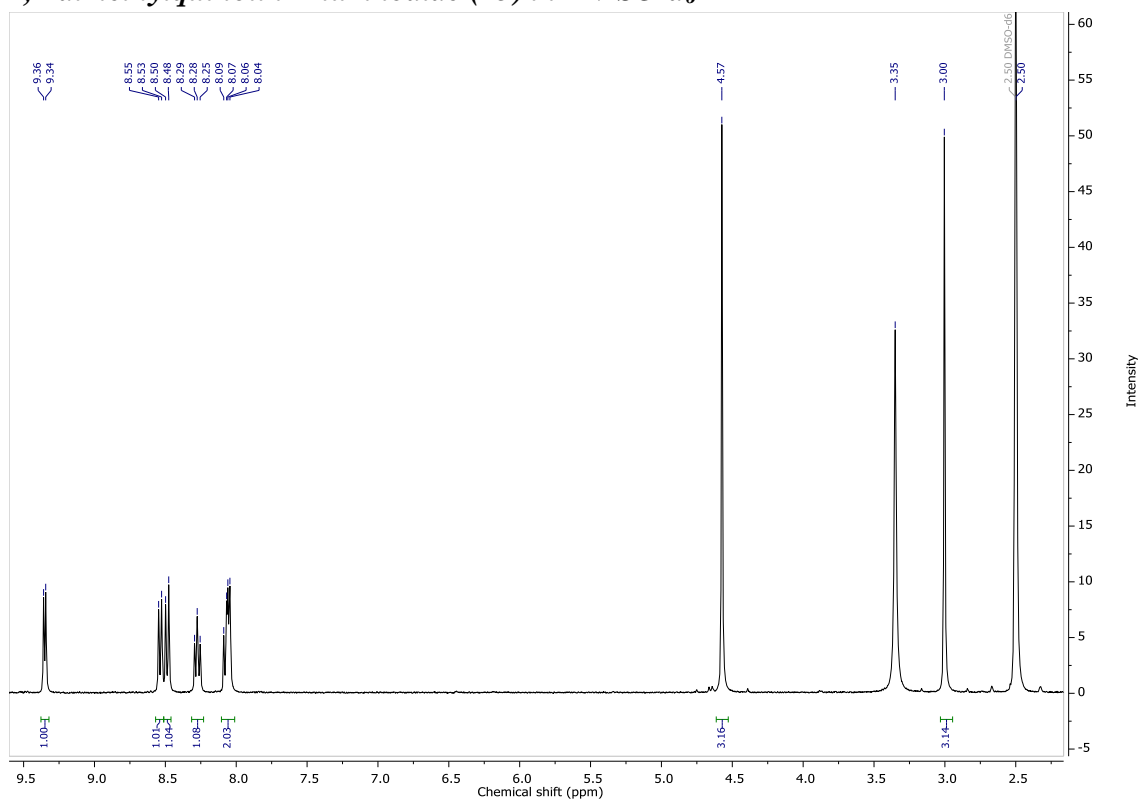

**(E)-4-(2-(9-ethyl-9H-carbazol-3-yl)vinyl)-1-methylpyridin-1-ium iodide (3a) in DMSO-d<sub>6</sub>**

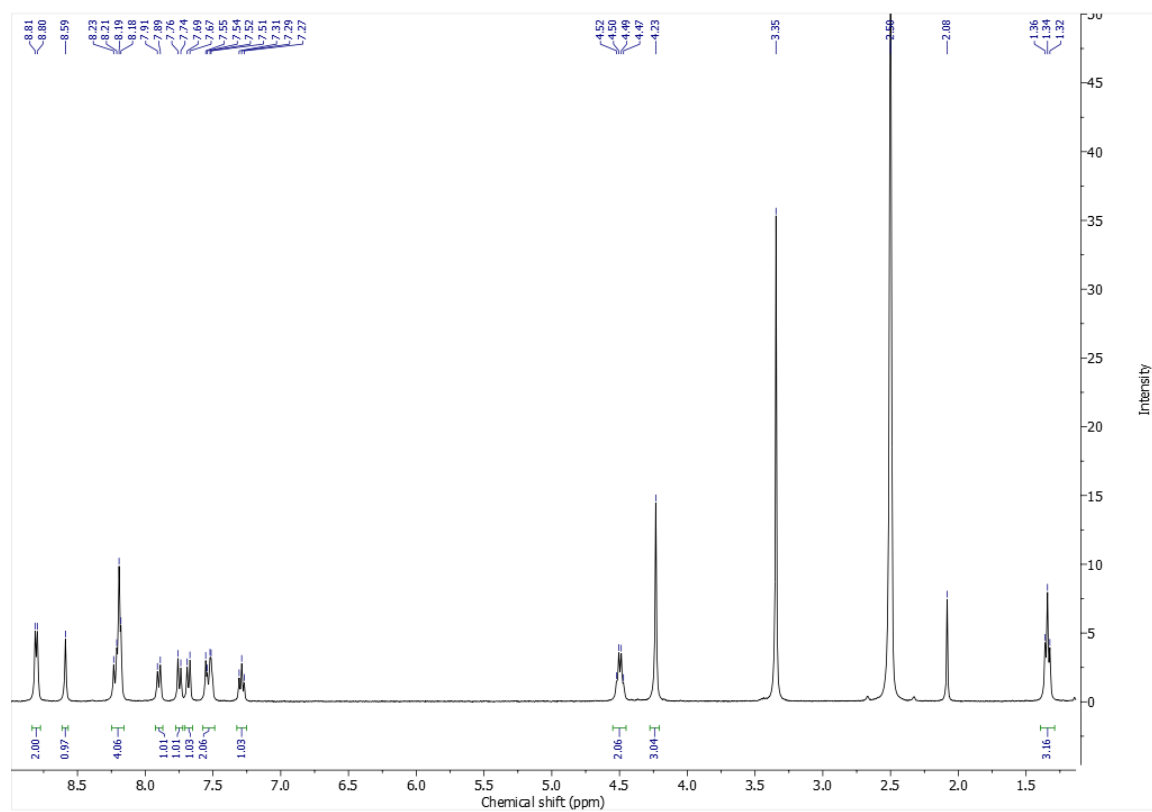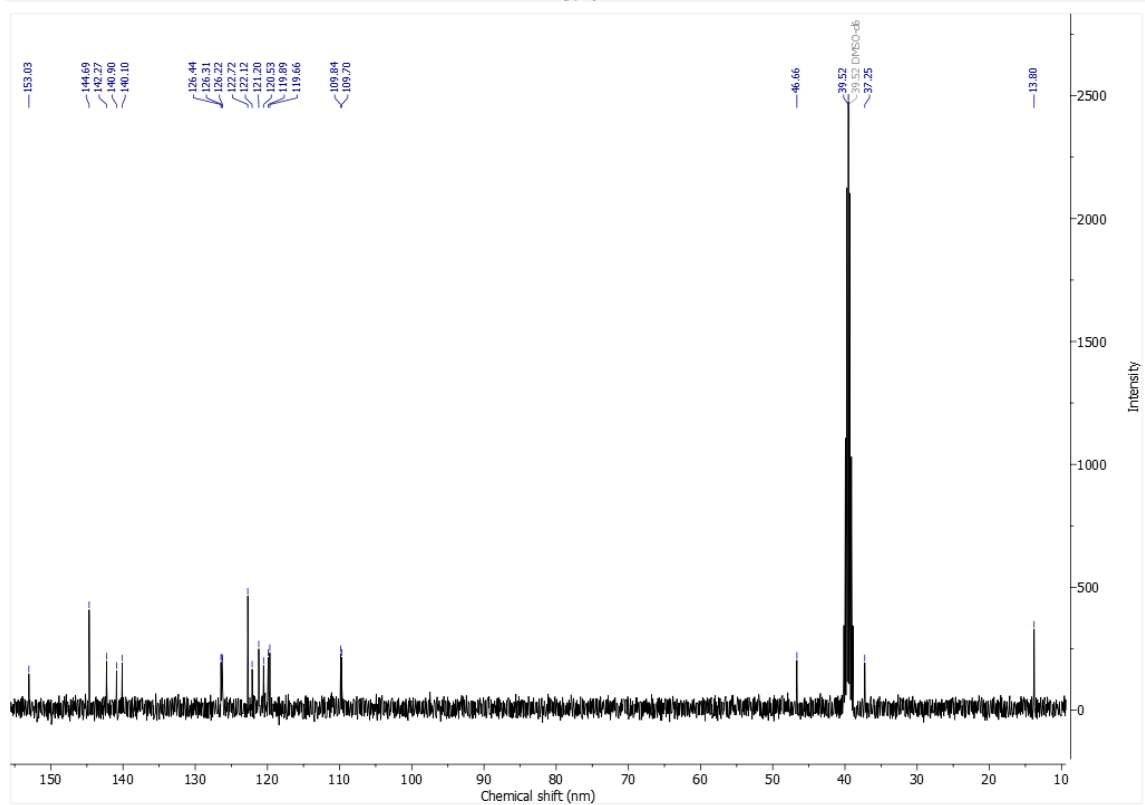

**(E)-1-methyl-4-(2-(1-methylindolin-5-yl)vinyl)pyridin-1-ium iodide (4a) DMSO-*d*<sub>6</sub>**

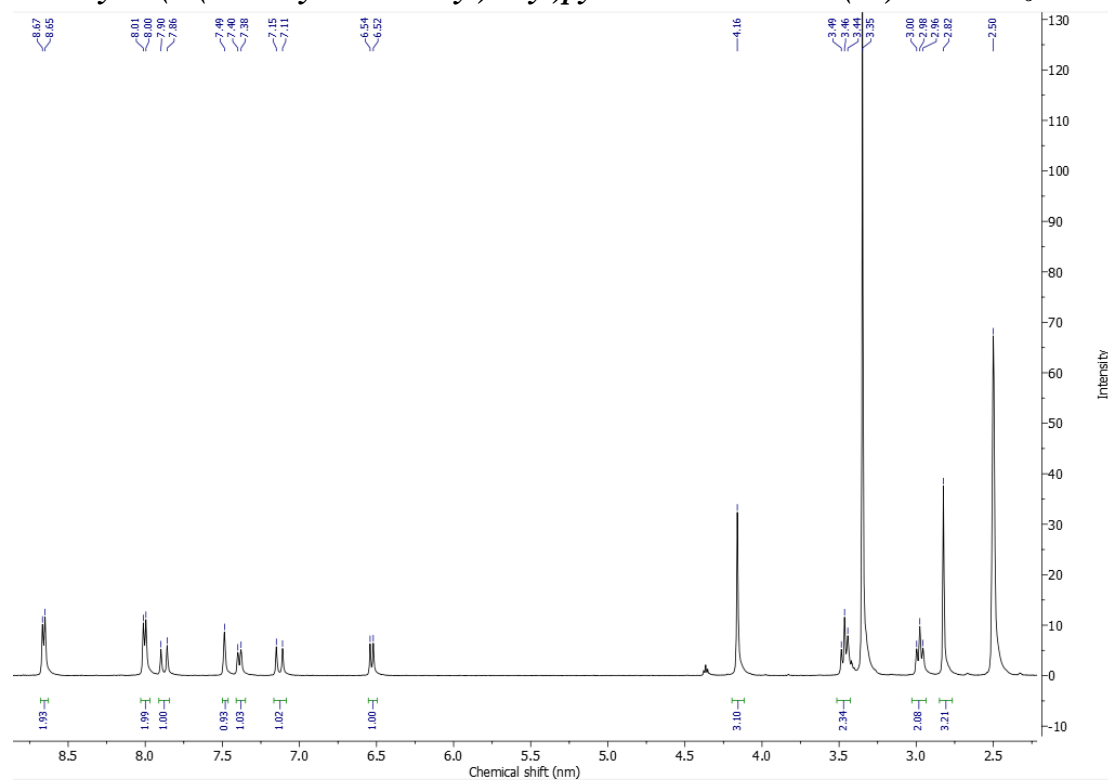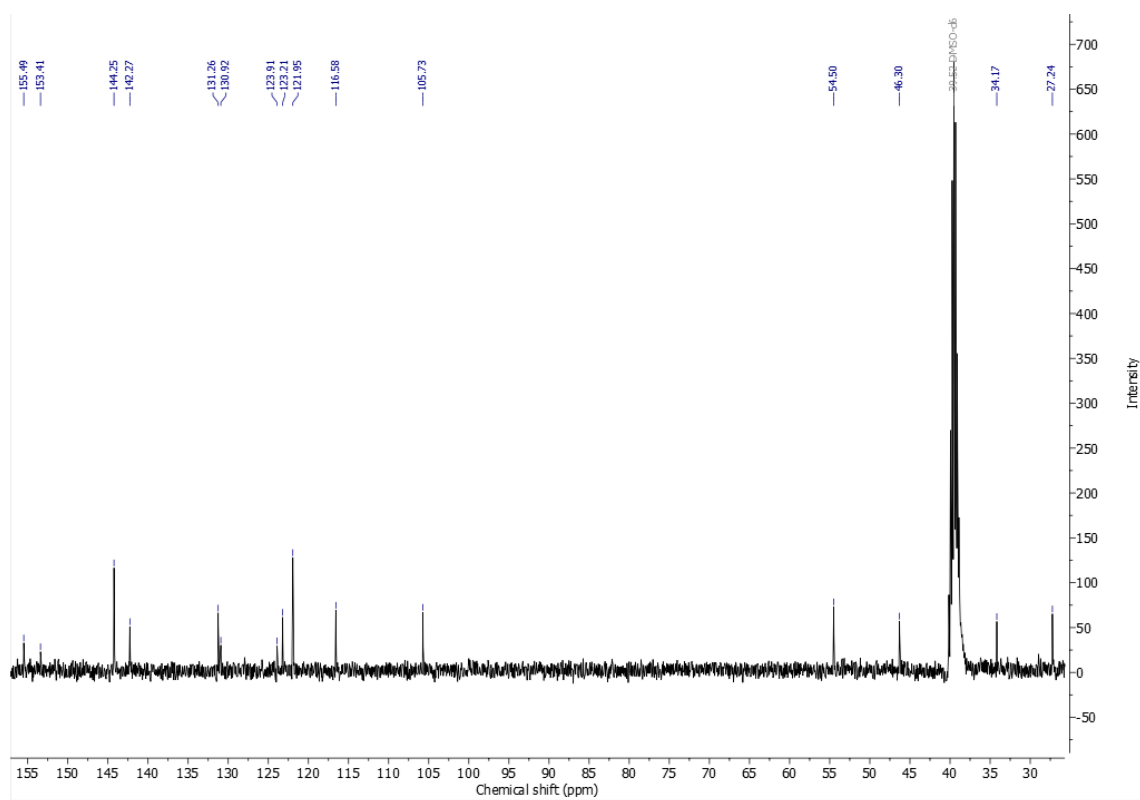

***COSY 4a***

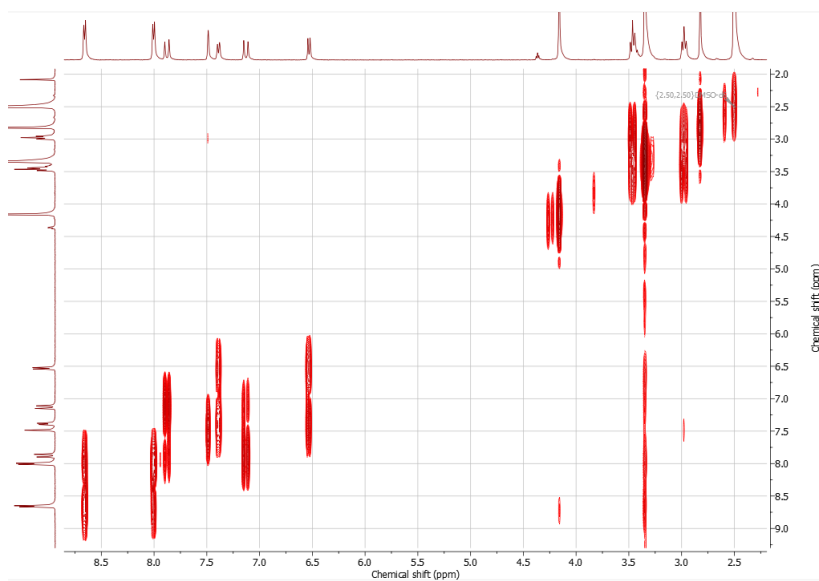

***HSQC 4a***

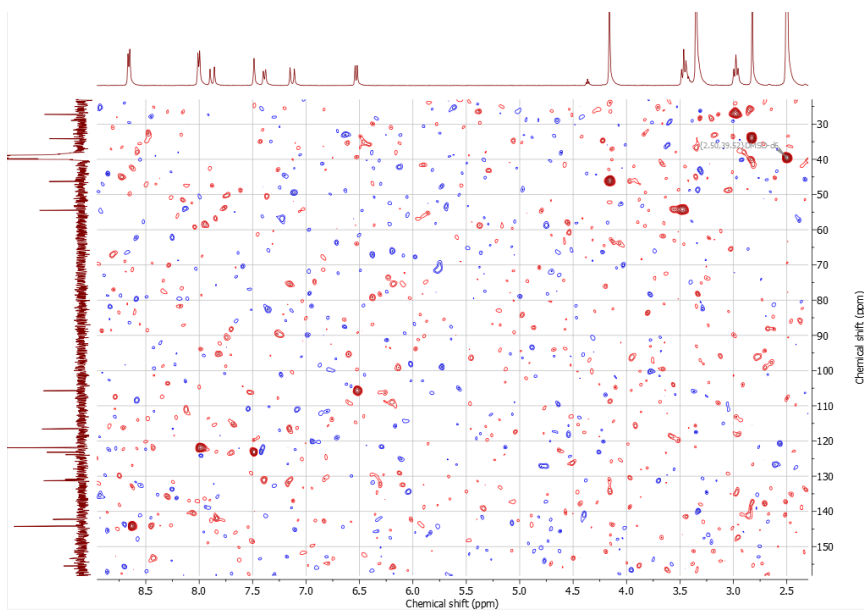

***HMBC 4a***

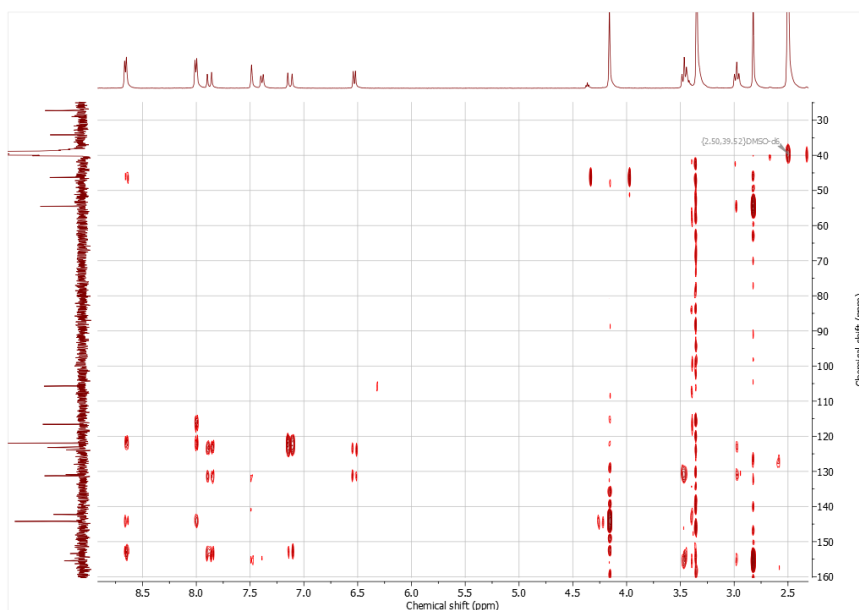

***(E)*-1-methyl-4-(2-(4-methyl-3,4-dihydro-2H-benzo[*b*][1,4]oxazin-7-yl)vinyl)pyridin-1-ium iodide (5a) in DMSO-*d*<sub>6</sub>**

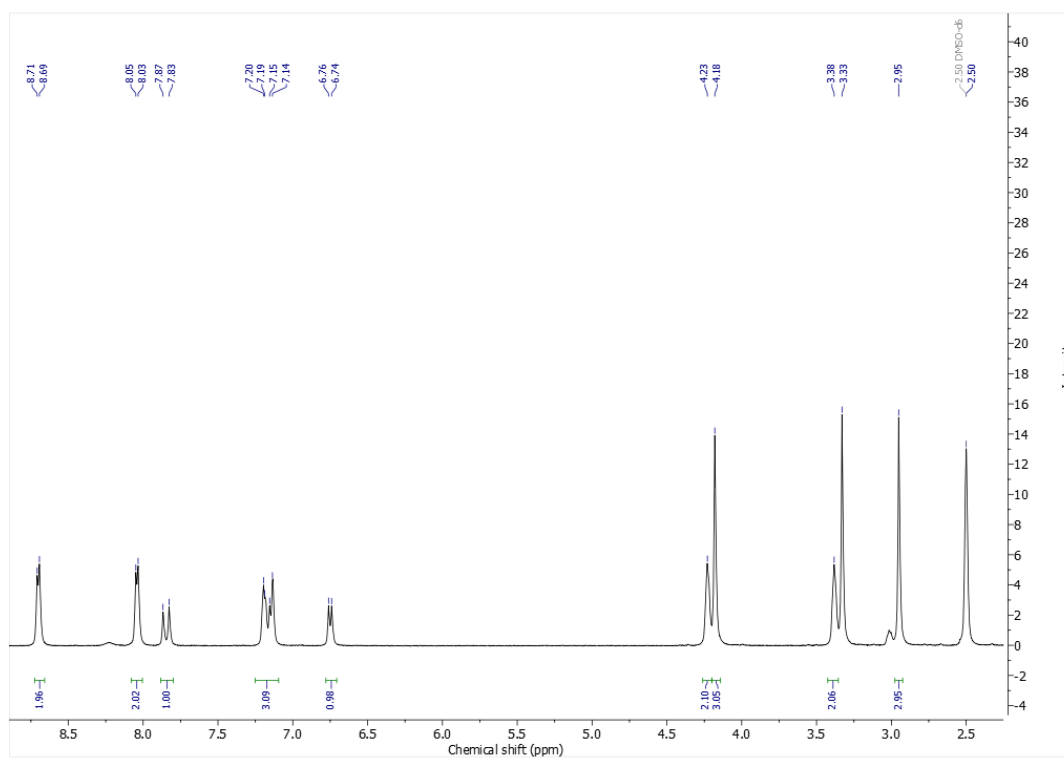



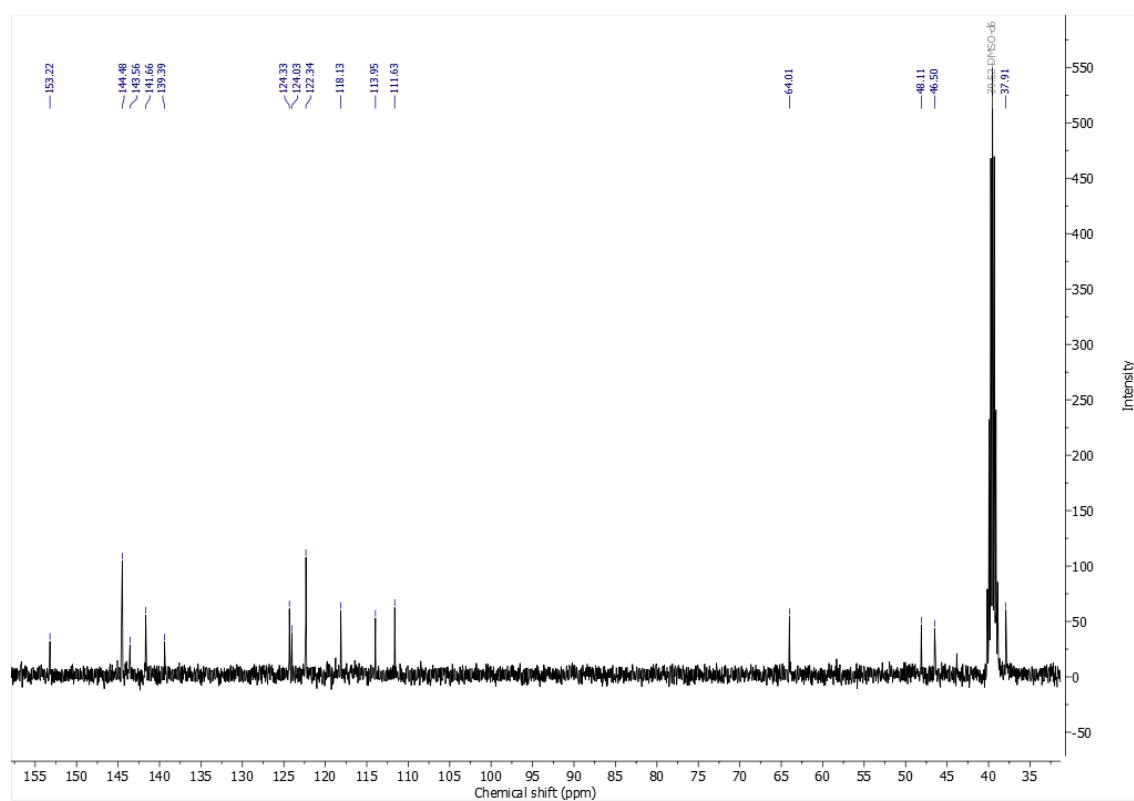

### *COSY 5a*

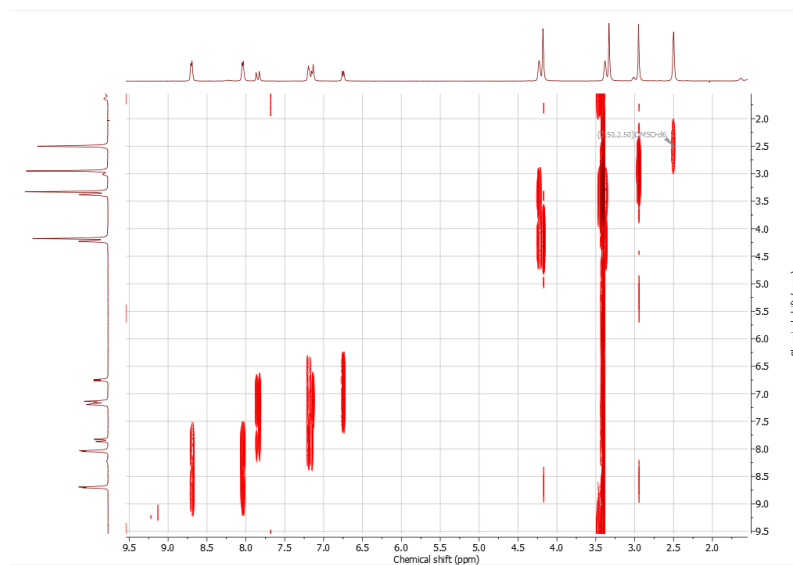

### *HSQC 5a*

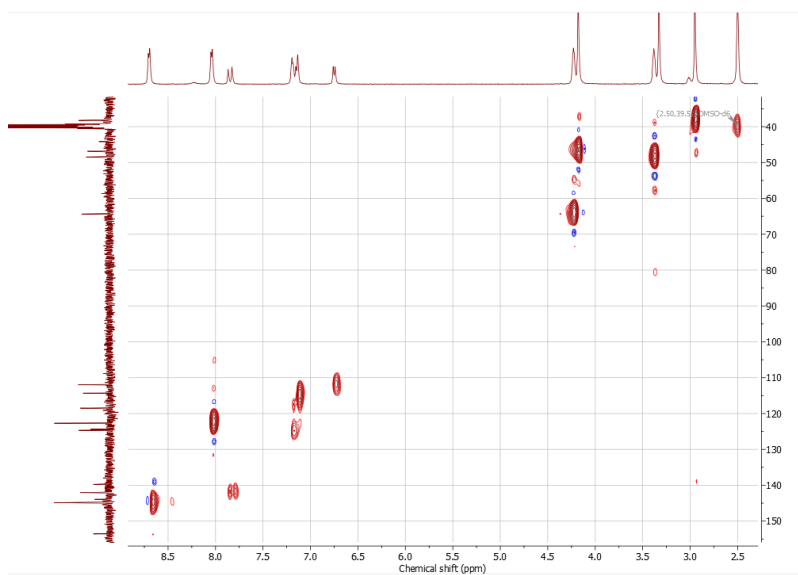

### *HMBC 5a*

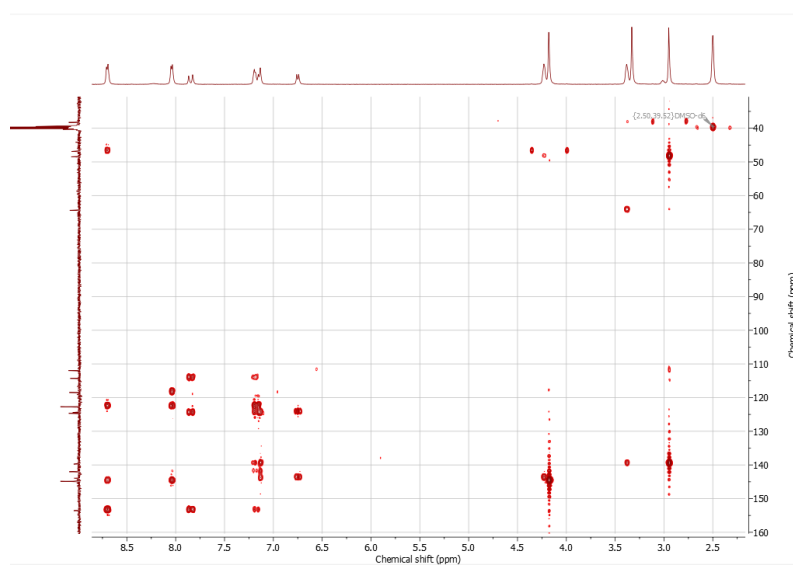

***(E)*-4-(4-(dimethylamino)styryl)-1-methylpyridin-1-ium iodide (6a, DASPI) in DMSO-*d*<sub>6</sub>**

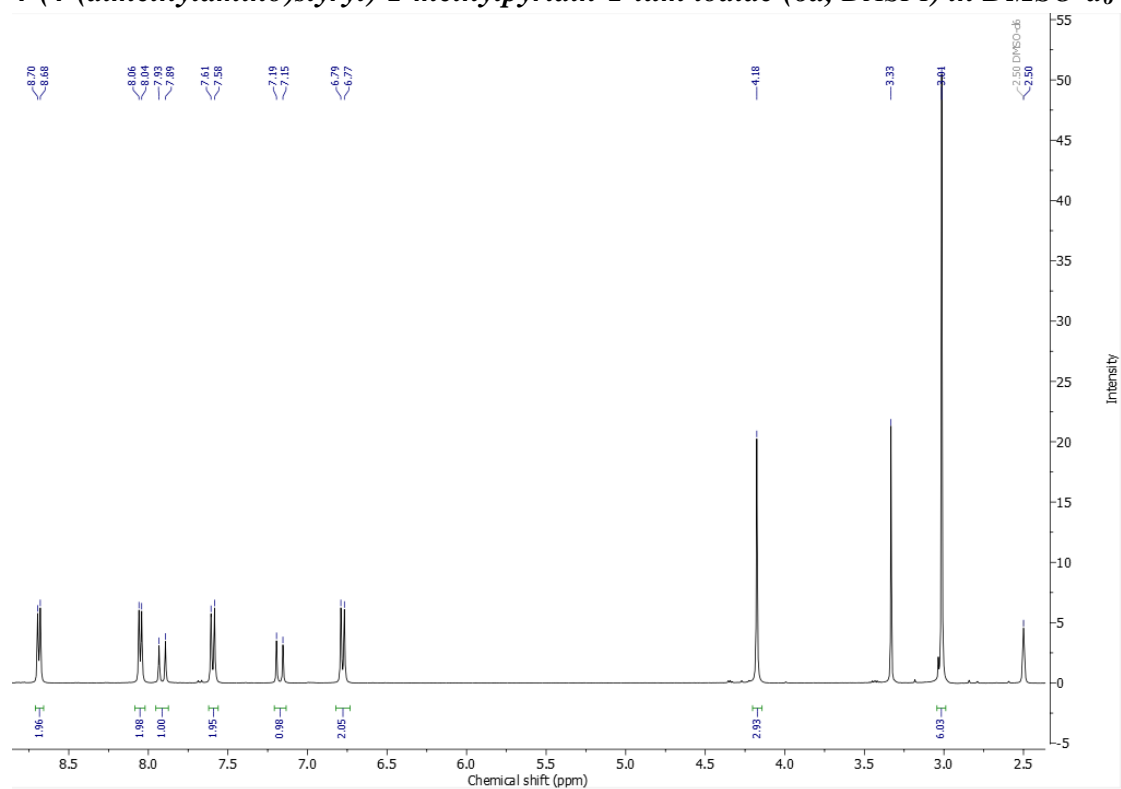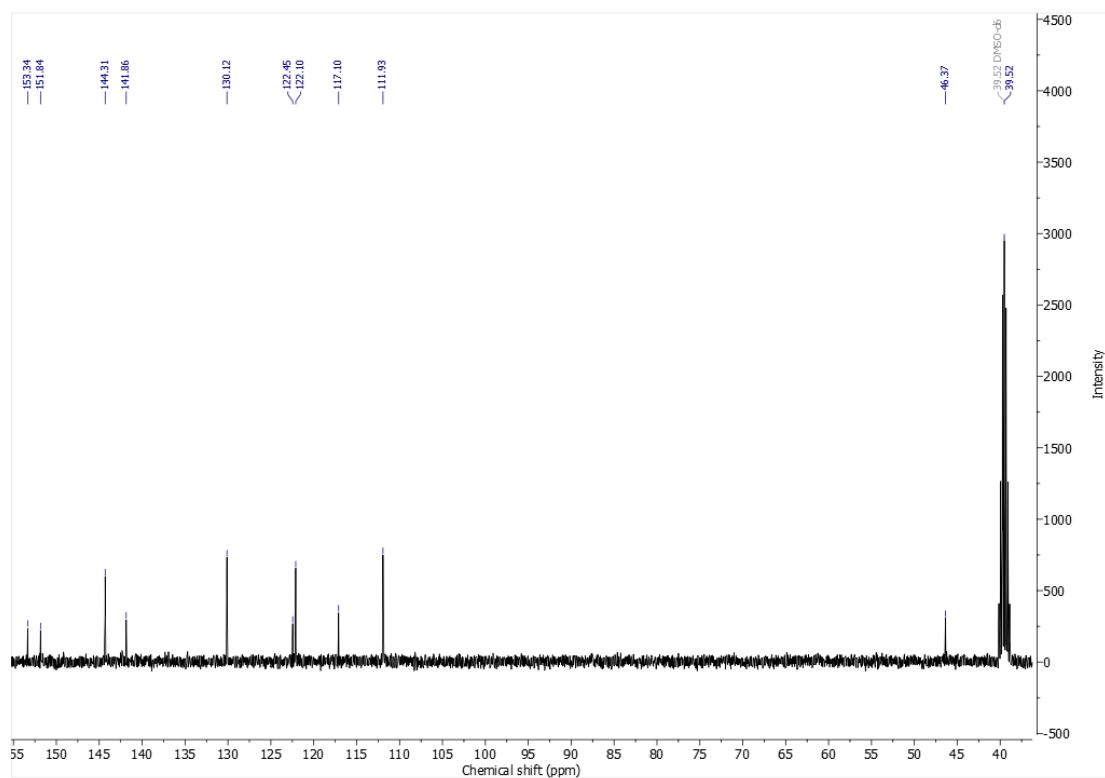

***(E)*-4-(4-(diphenylamino)styryl)-1-methylpyridin-1-ium iodide (7a) in DMSO-*d*<sub>6</sub>**

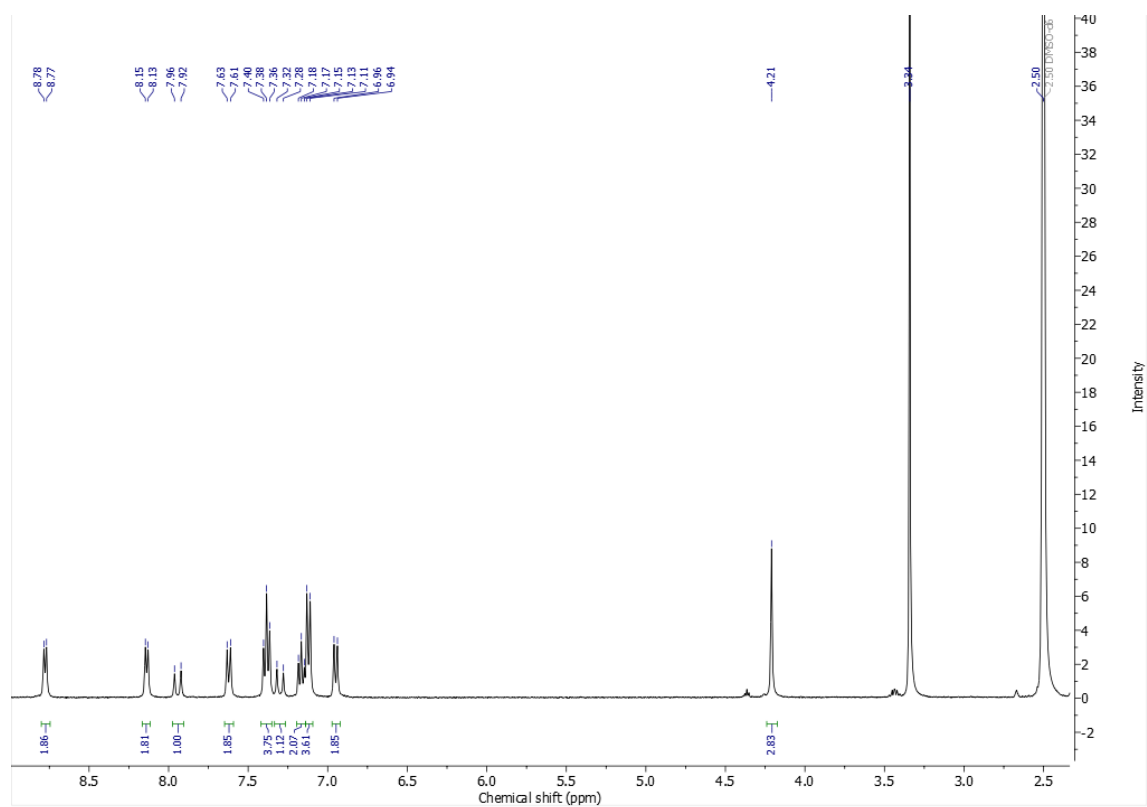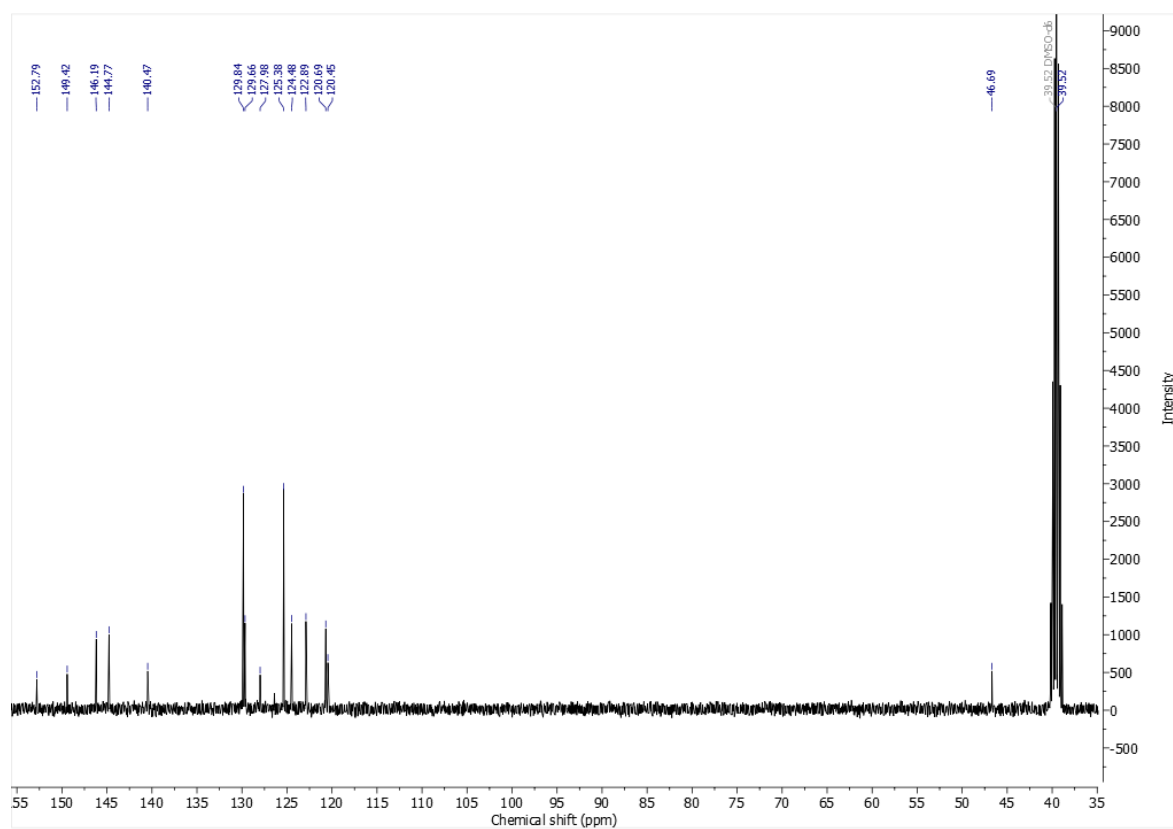

**(E)-1-methyl-4-(2-(1-propyl-1,2,3,4-tetrahydroquinolin-6-yl)vinyl)pyridin-1-ium iodide (8a)**  
in DMSO- $d_6$

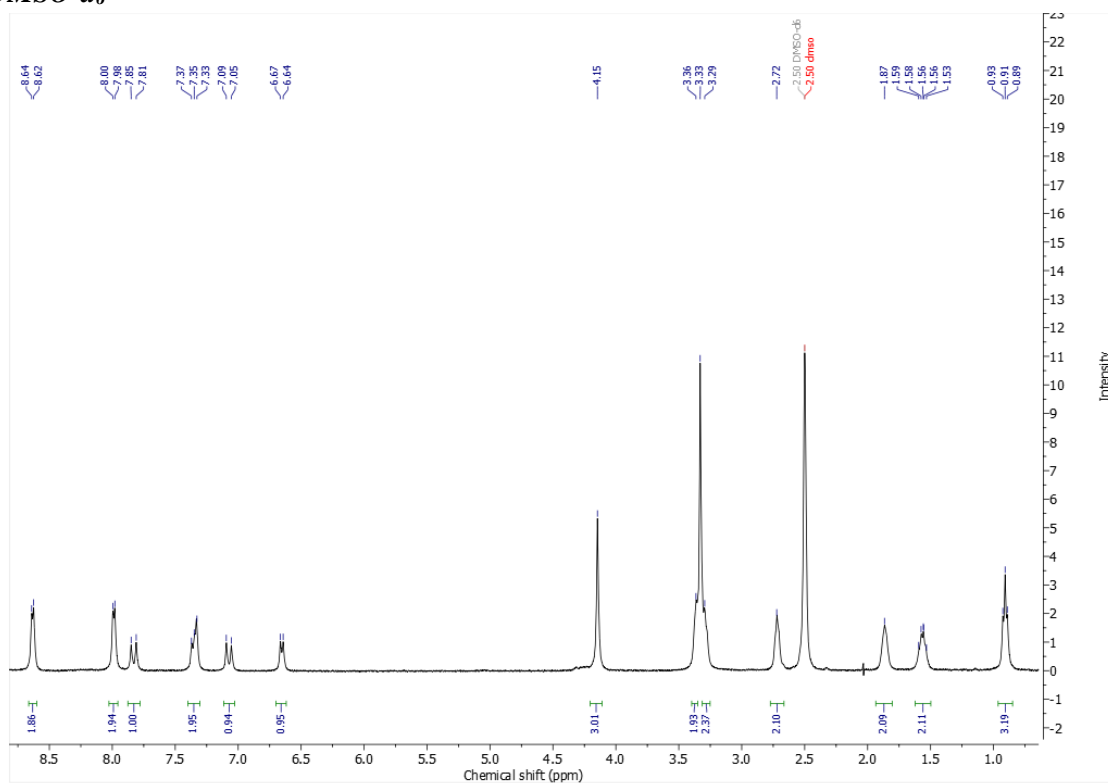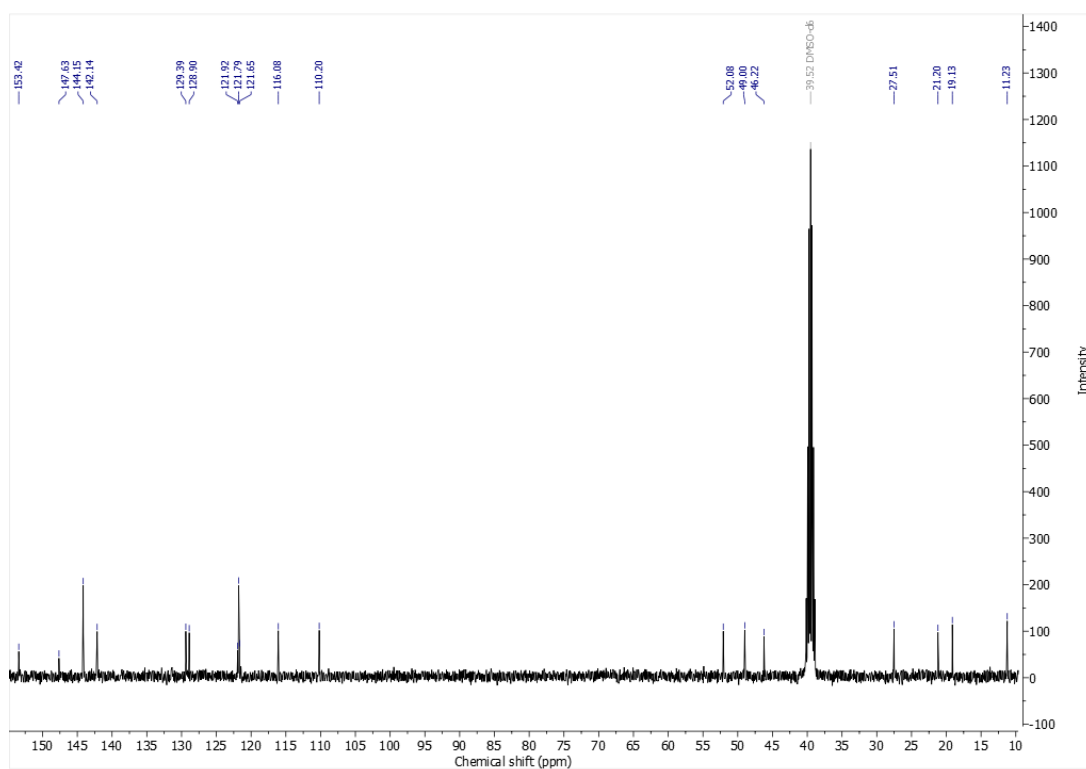

### *COSY 8a*

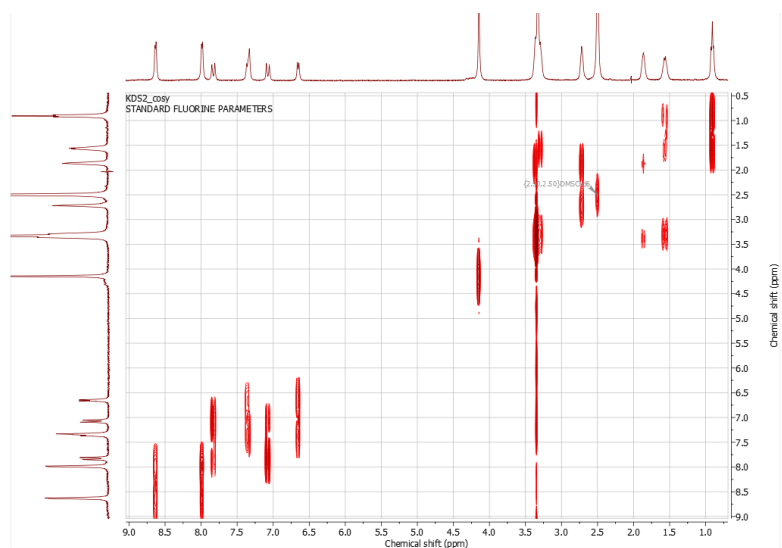

### *HSQC 8a*

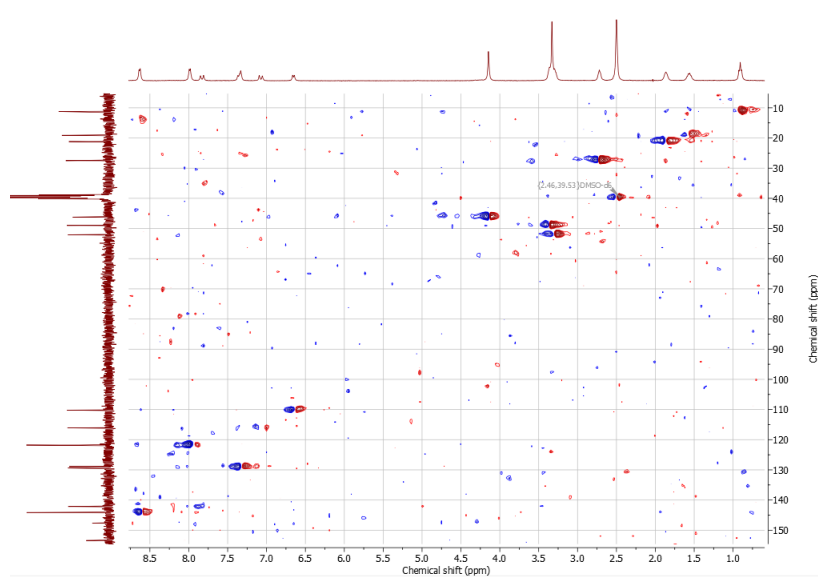

### *HMBC 8a*

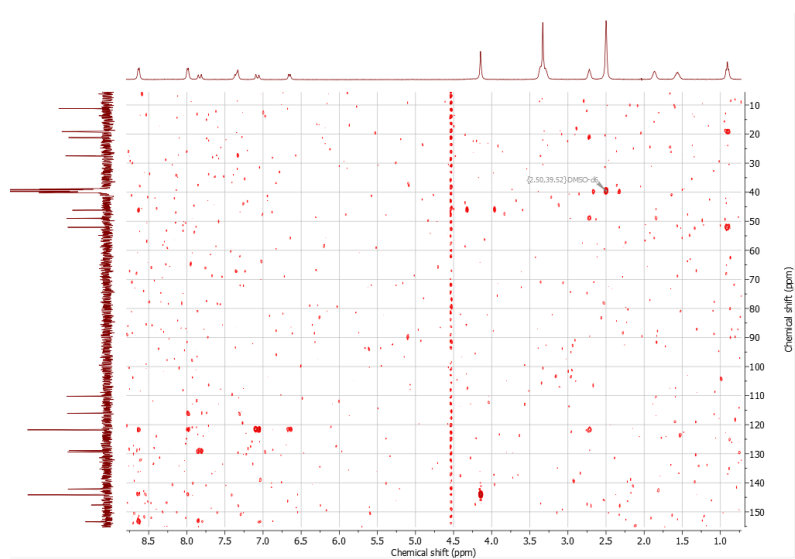

**(*E*)-1-methyl-4-(2-(2,3,6,7-tetrahydro-1*H*,5*H*-pyrido[3,2-*ij*]quinolin-9-yl)vinyl)pyridin-1-ium iodide (9a) in DMSO-*d*<sub>6</sub>**

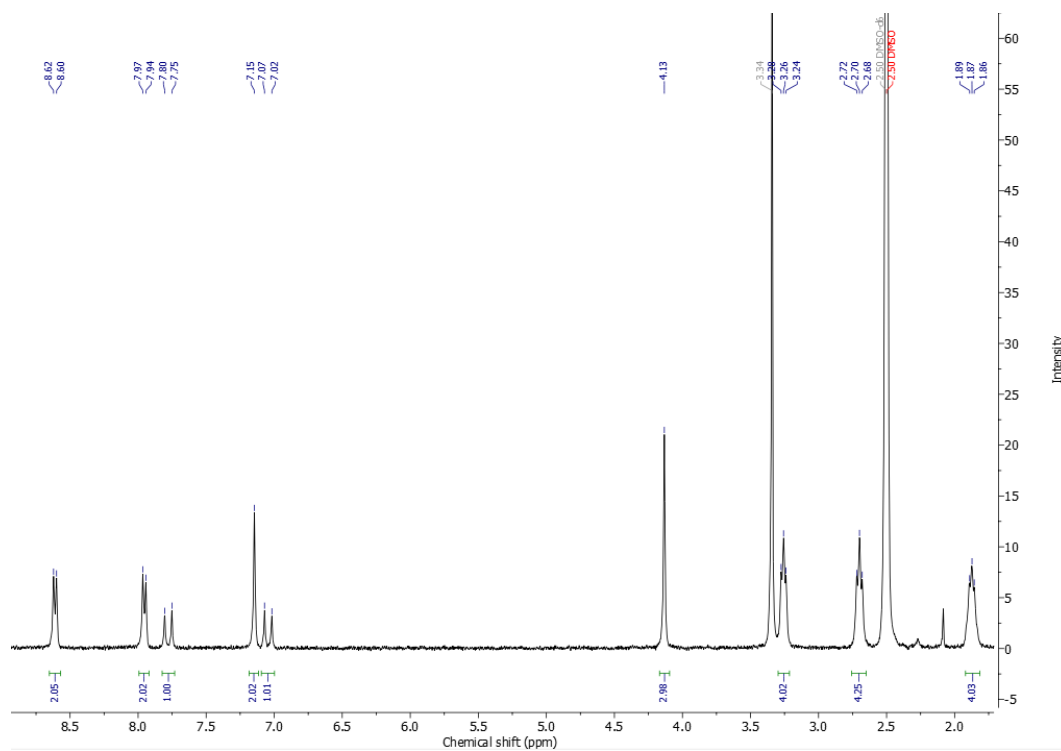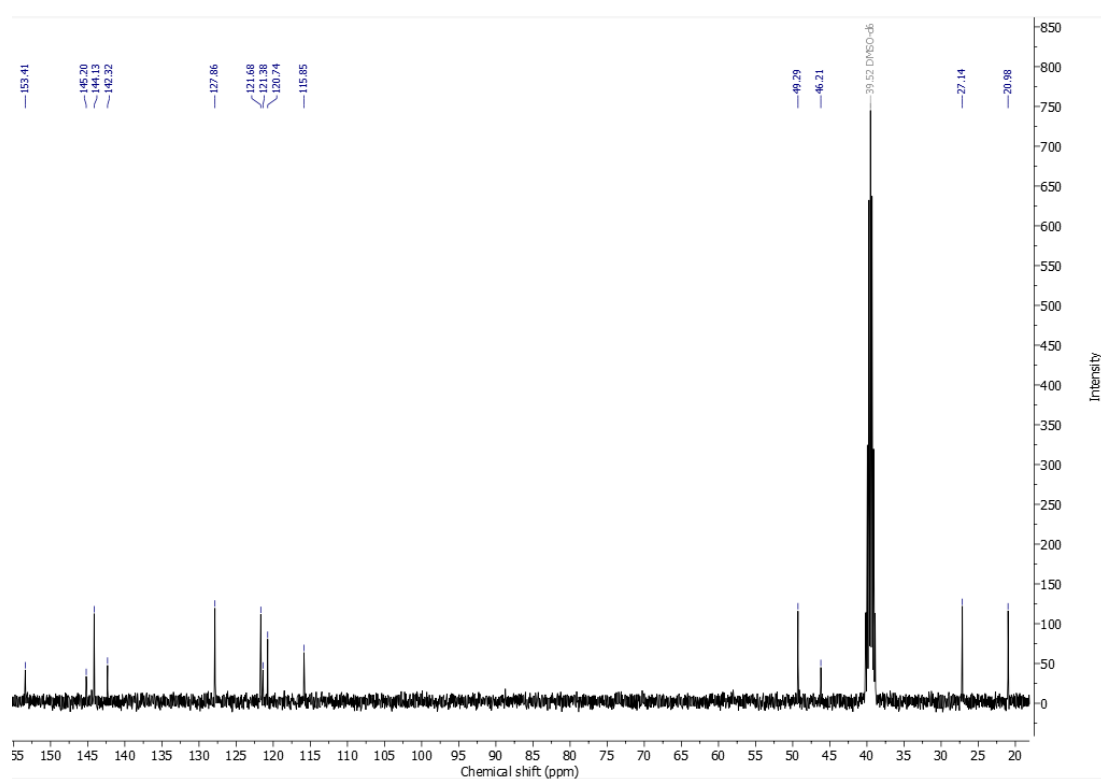

### *COSY 9a*

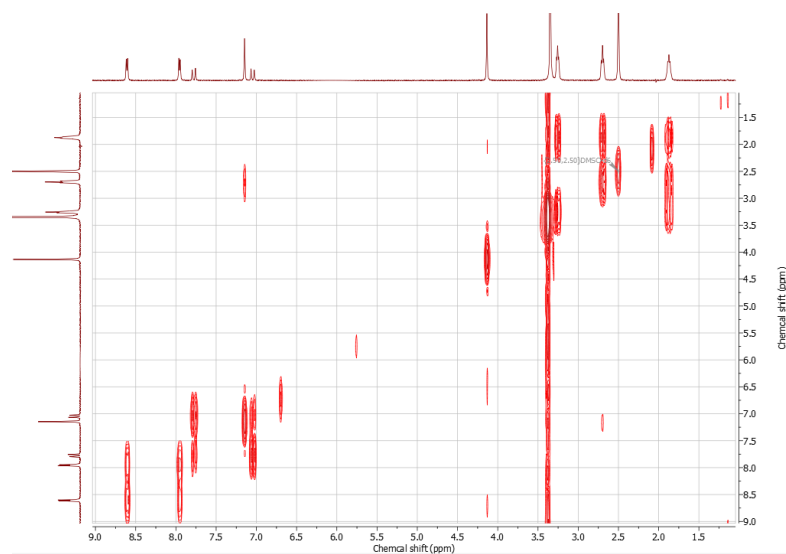

### *HSQC 9a*

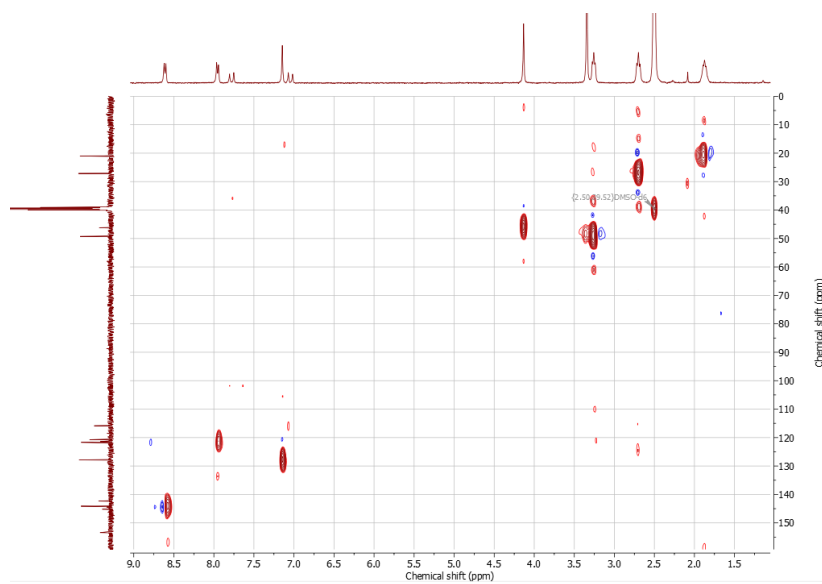

### *HMBC 9a*



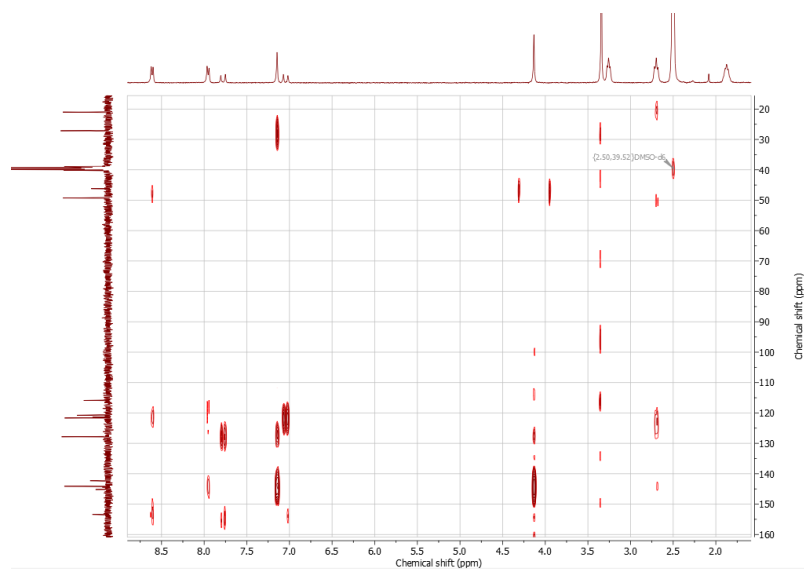

***(E)*-4-(2-(9-ethyl-9*H*-carbazol-3-yl)vinyl)-1-methylquinolin-1-ium iodide (3b) in DMSO-*d*<sub>6</sub>**

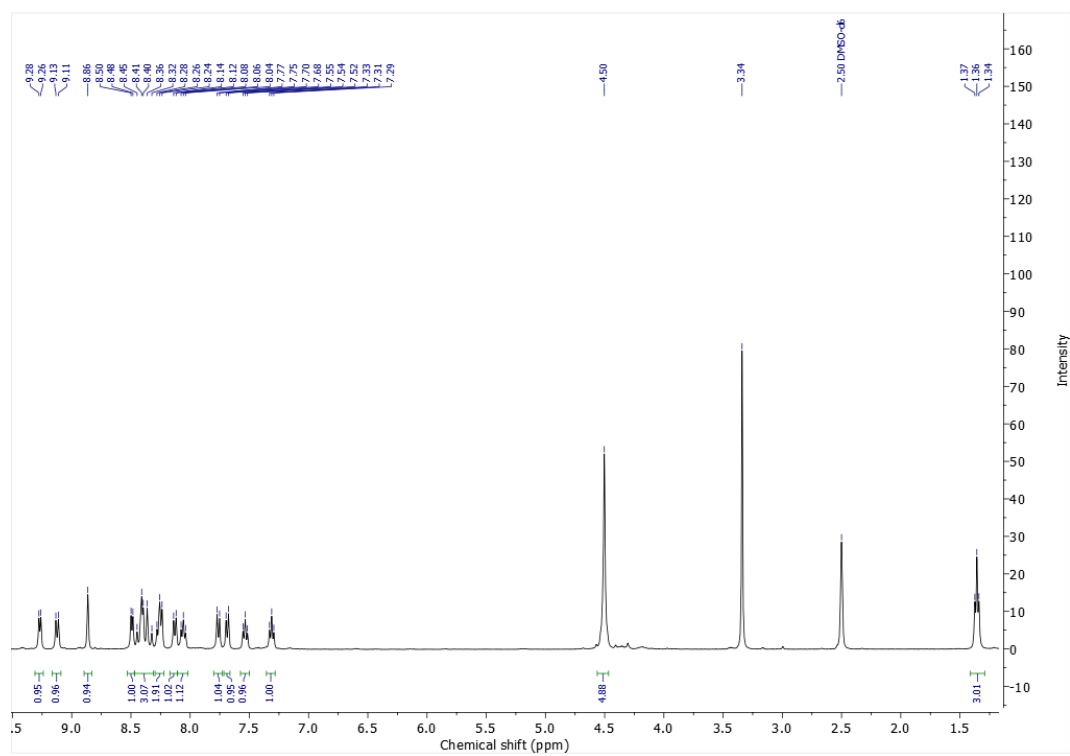

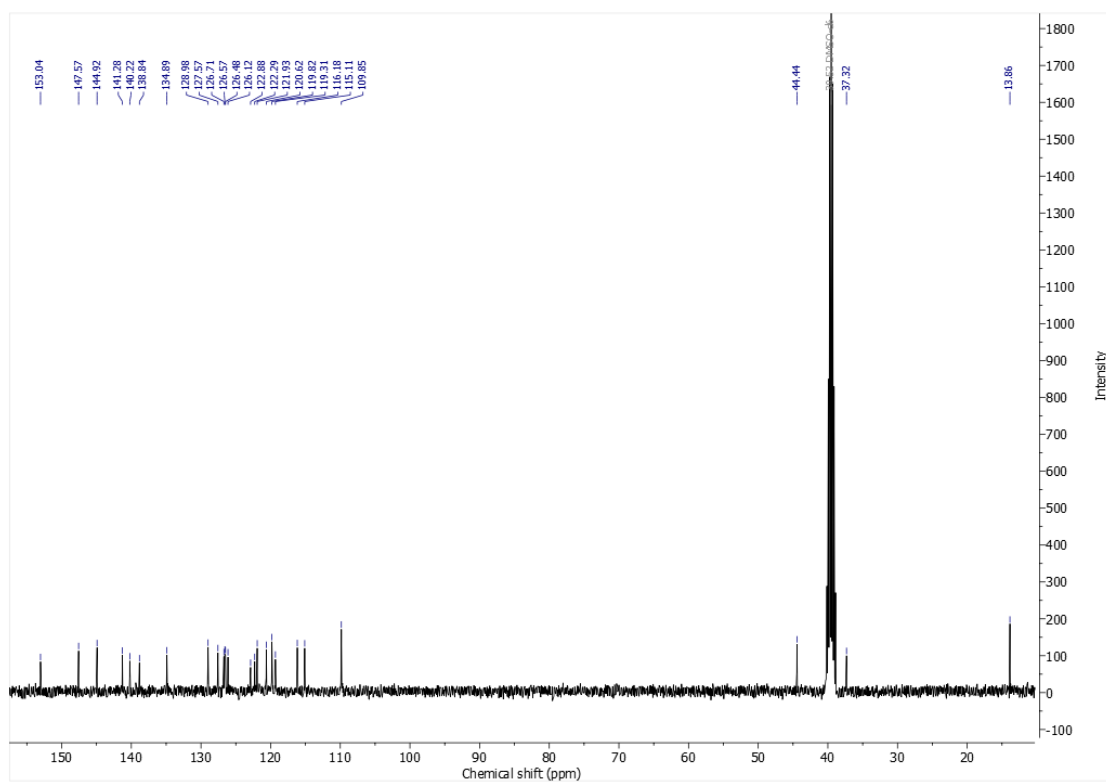

### *COSY 3b*

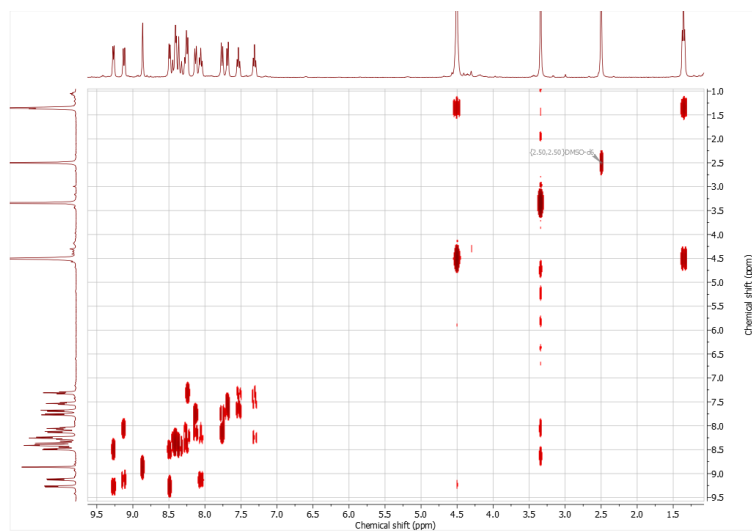

### *HSQC 3b*

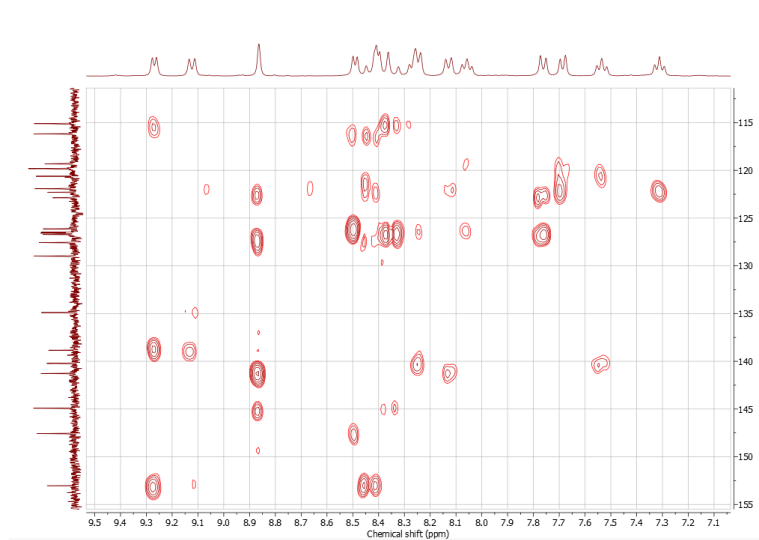

### *HMBC 3b*

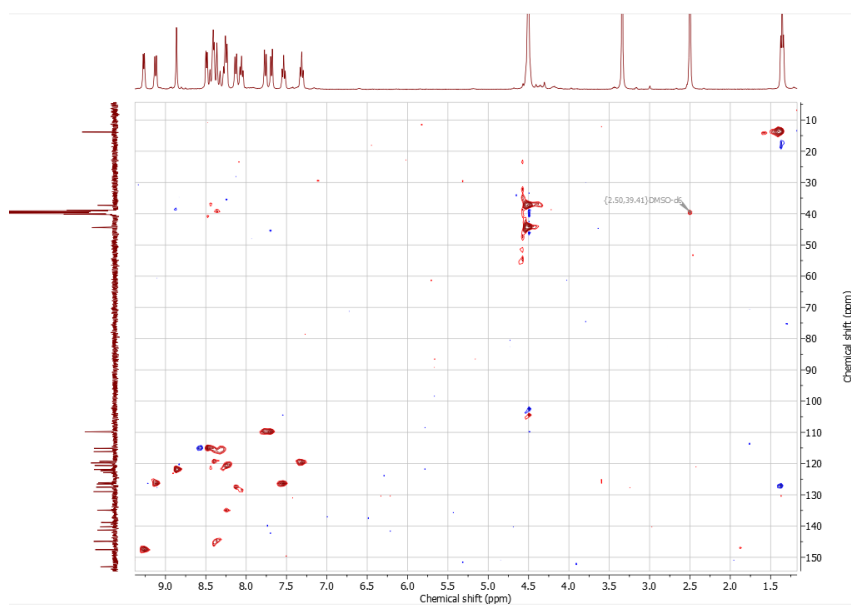

**(E)-1-methyl-4-(2-(1-methylindolin-5-yl)vinyl)quinolin-1-ium iodide (4b) in DMSO-d<sub>6</sub>**

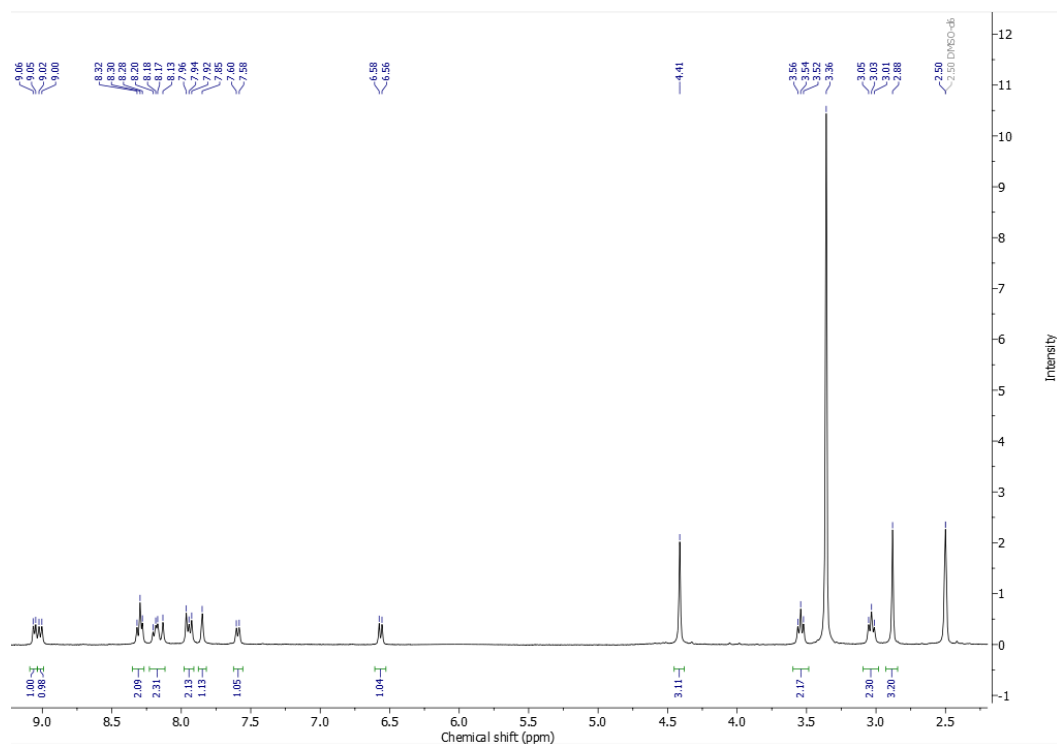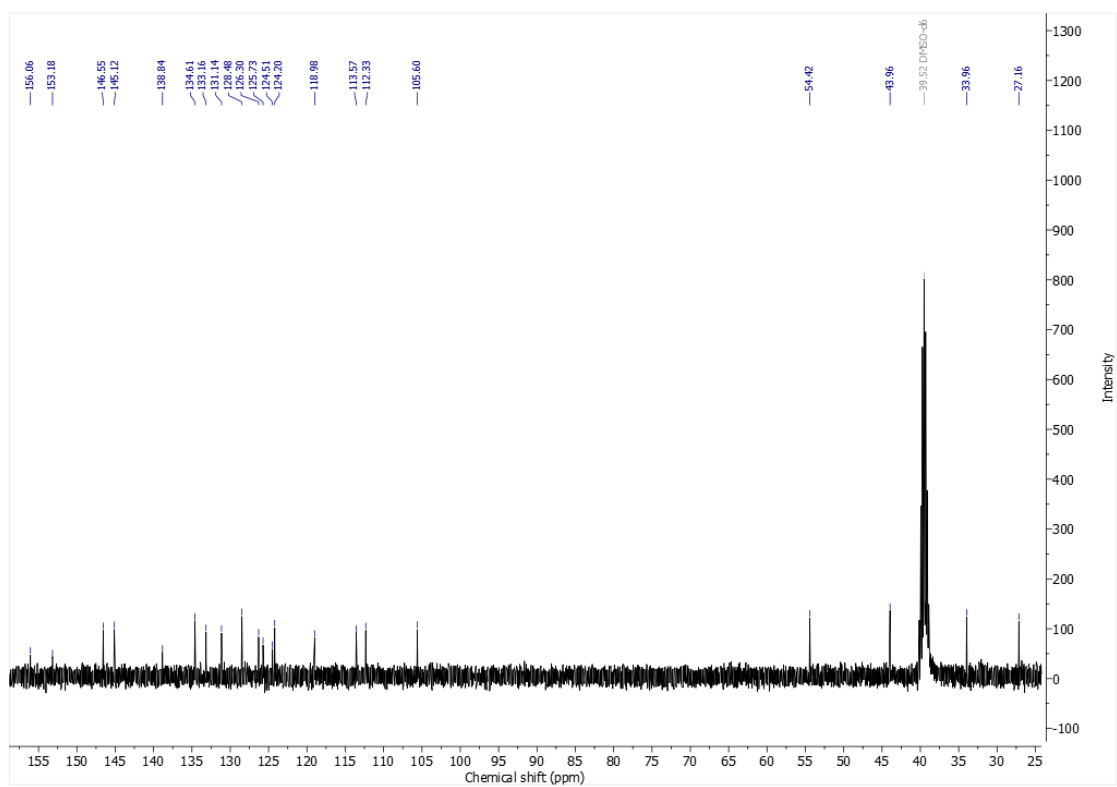

***COSY 4b***

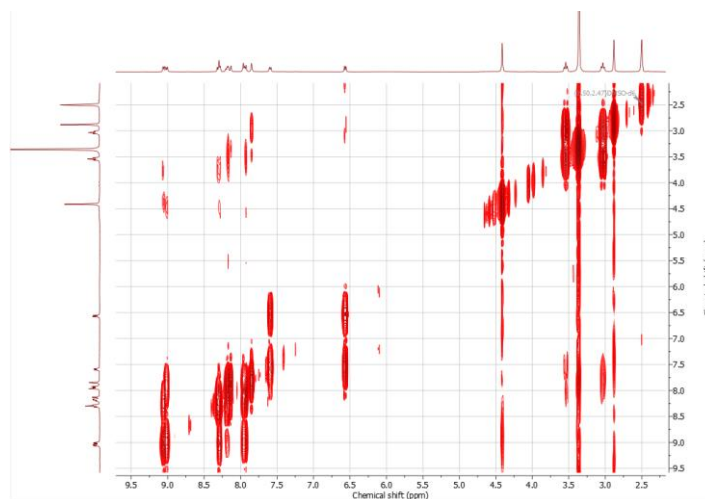

***HSQC 4b***

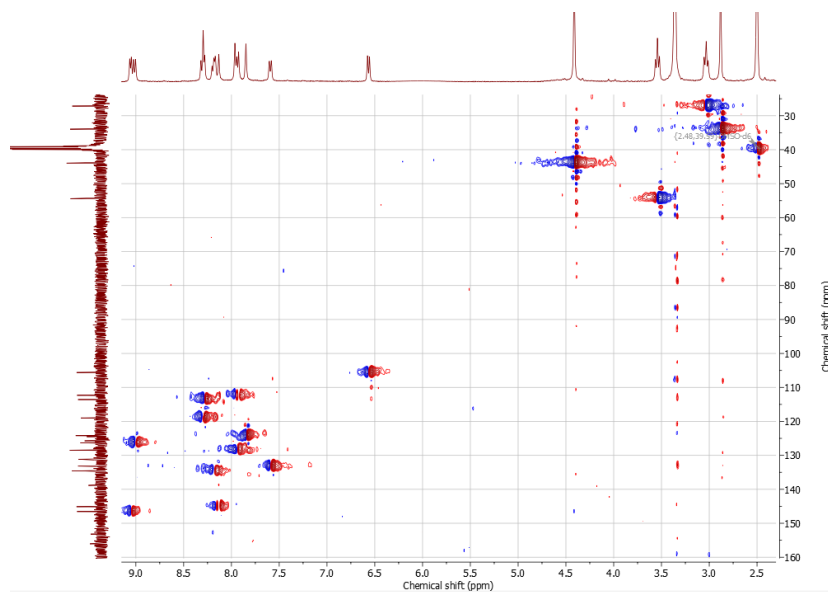

***HMBC 4b***

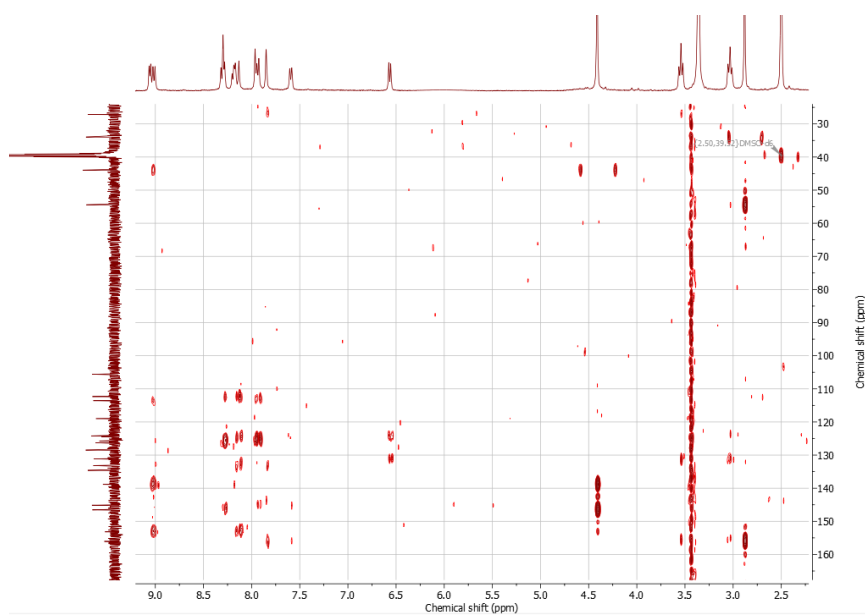

***(E)*-1-methyl-4-(2-(4-methyl-3,4-dihydro-2H-benzo[*b*][1,4]oxazin-7-yl)vinyl)quinolin-1-ium iodide (5b) in DMSO-*d*<sub>6</sub>**

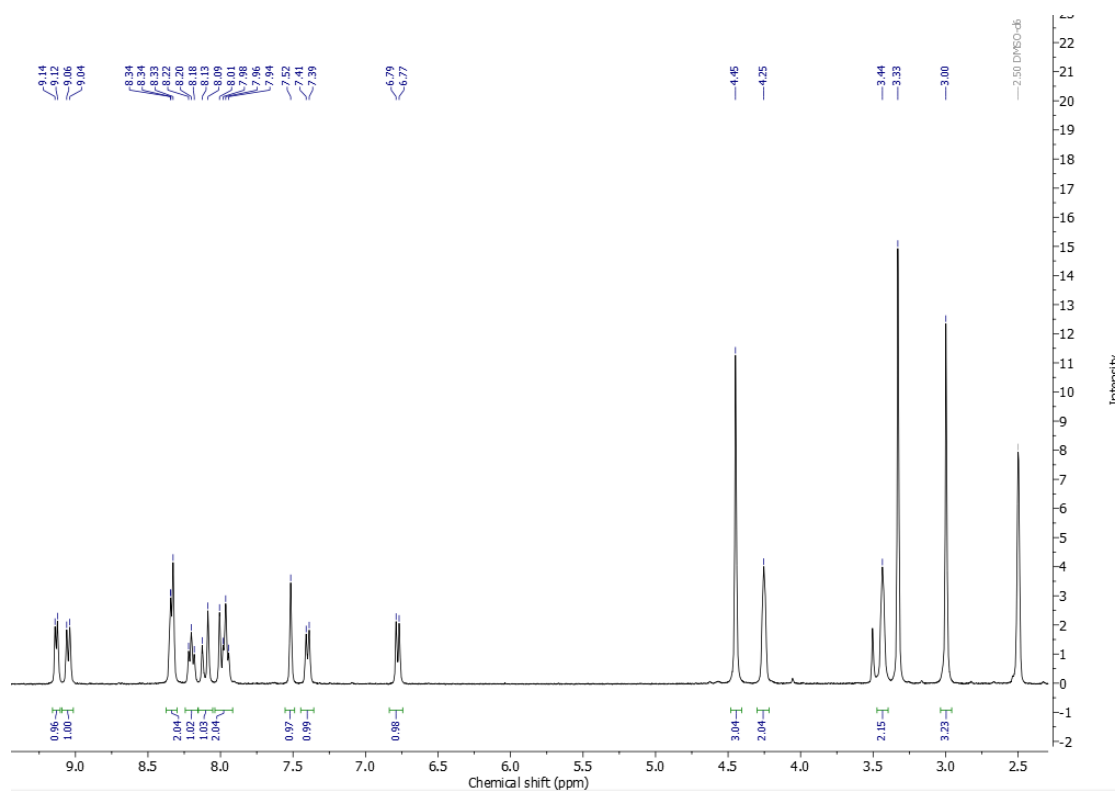

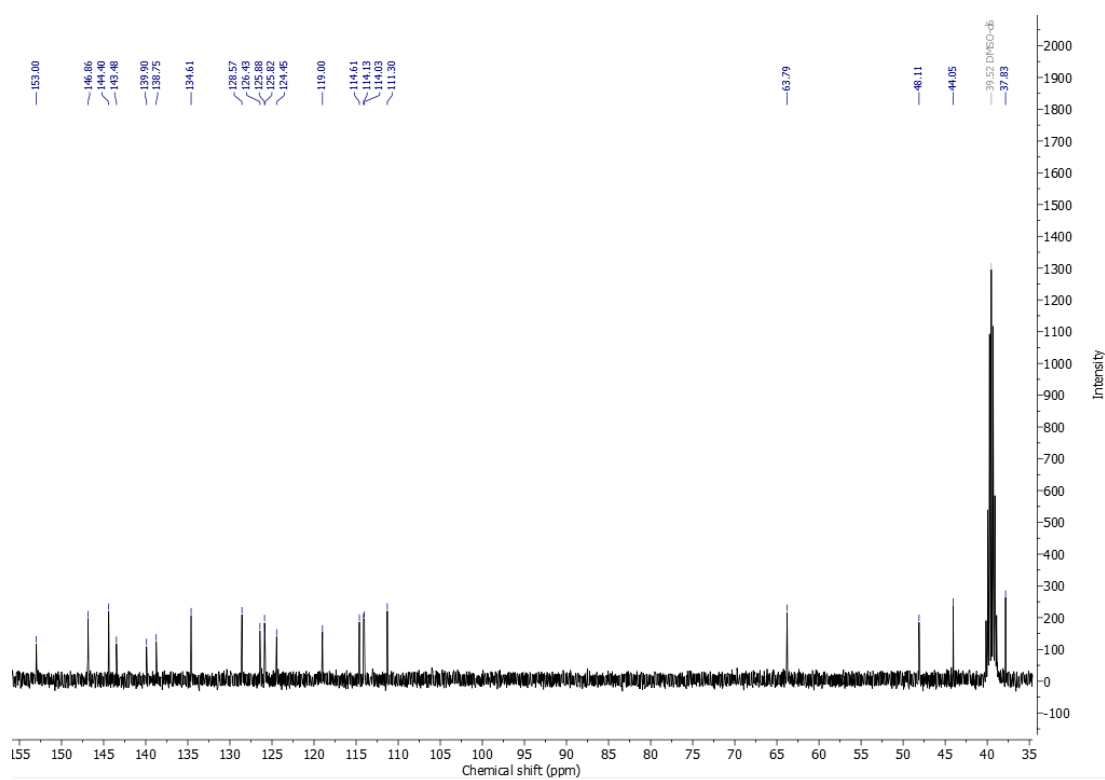

### *COSY 5b*

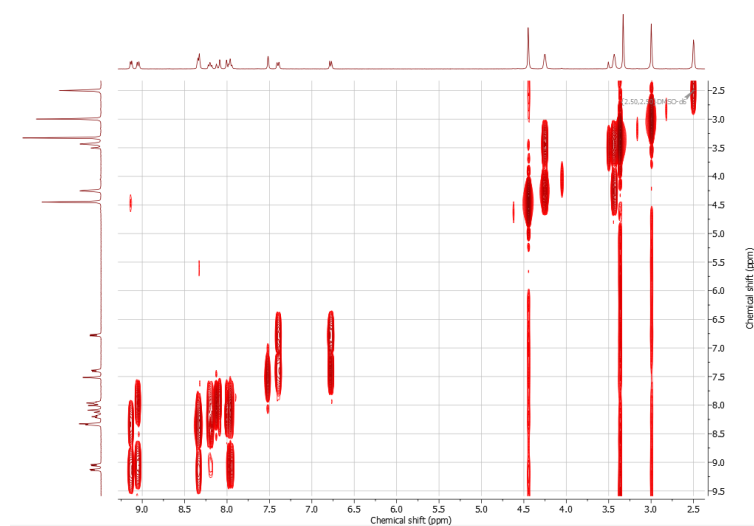

### *HSQC 5b*

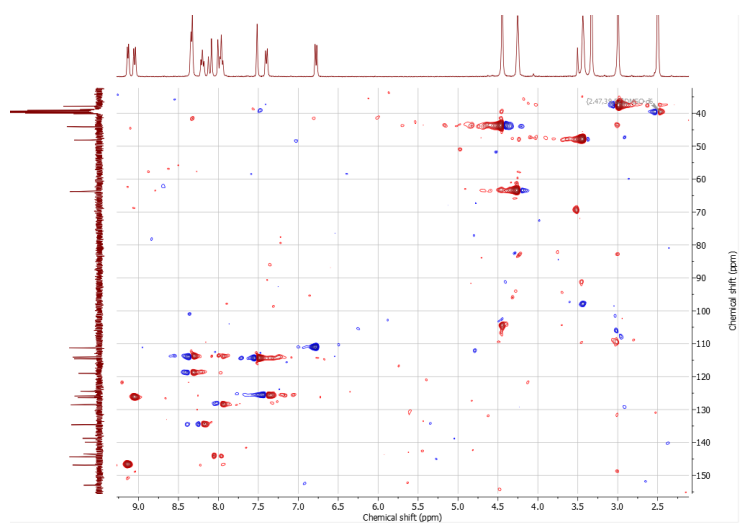

### *HMBC 5b*

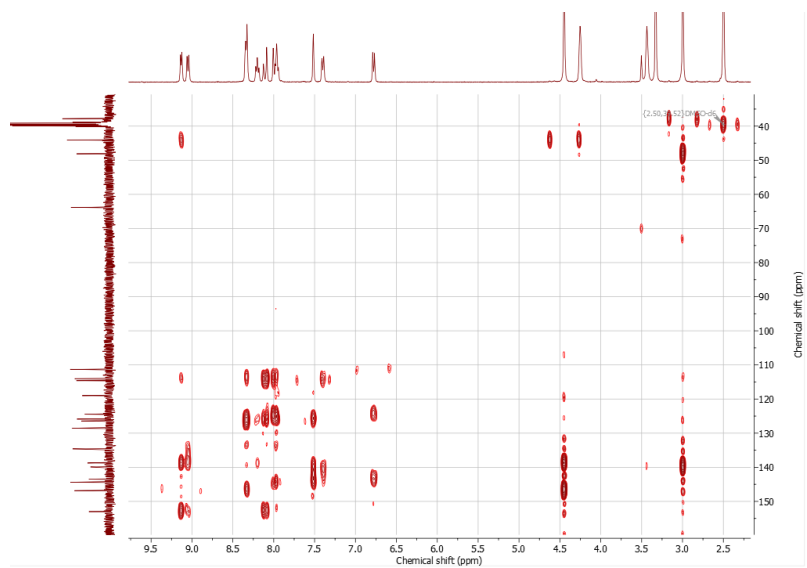



**(E)-4-(4-(dimethylamino)styryl)-1-methylquinolin-1-ium iodide (6b) in DMSO-d<sub>6</sub>**

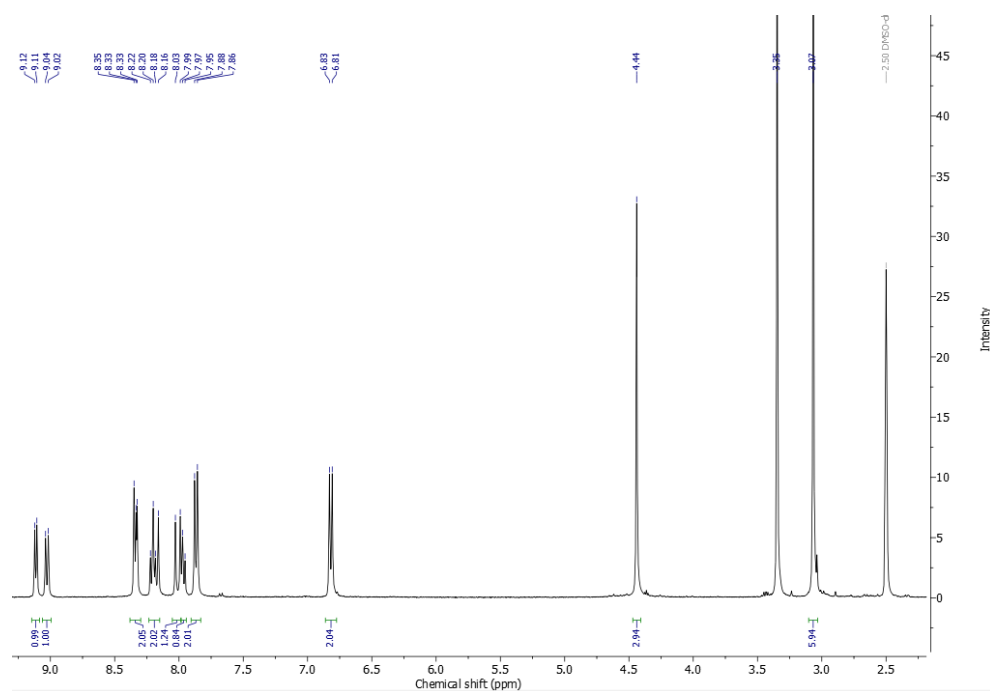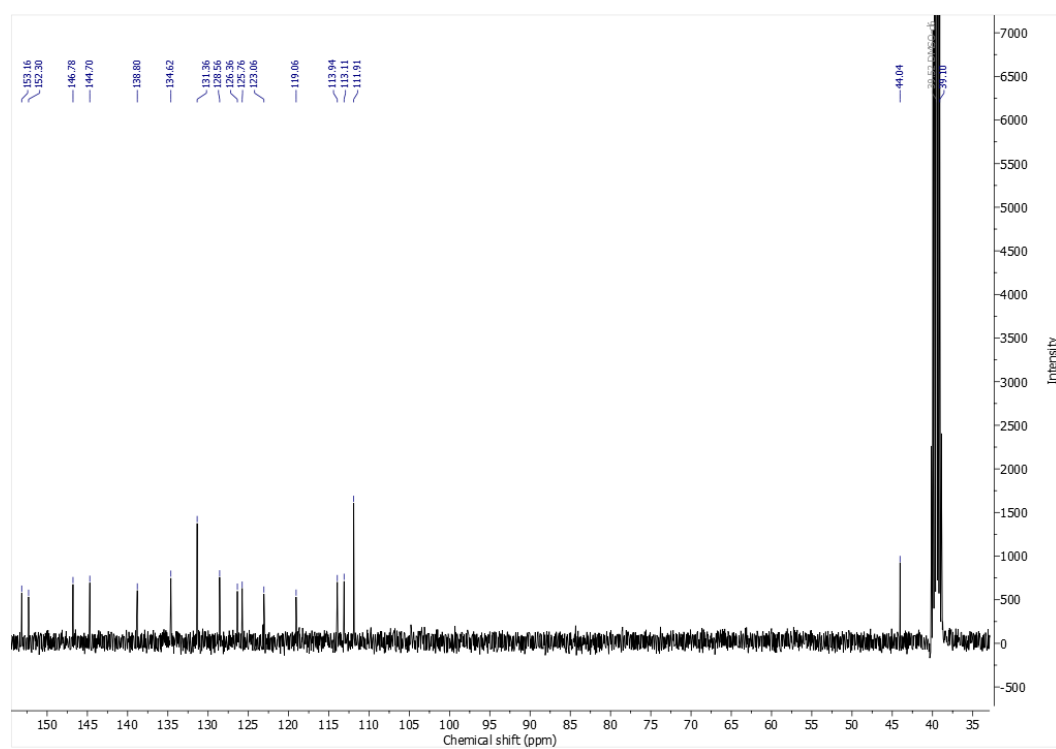

### *HSQC 6b*

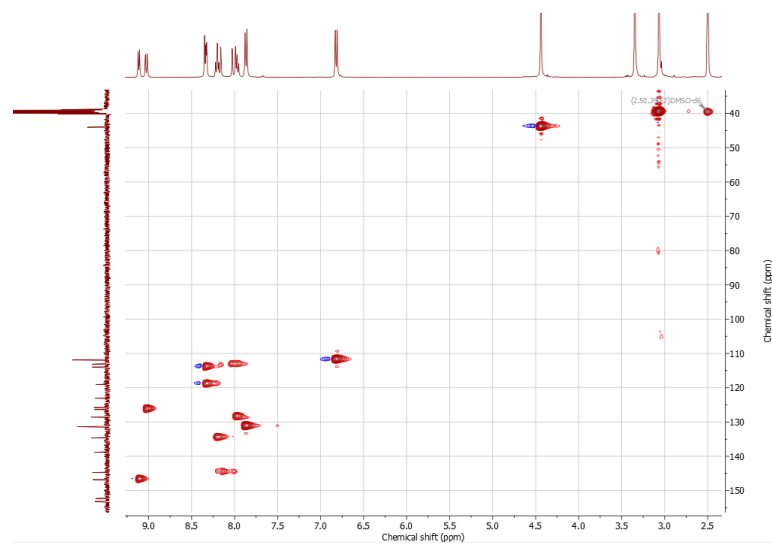

### *HMBC 6b*

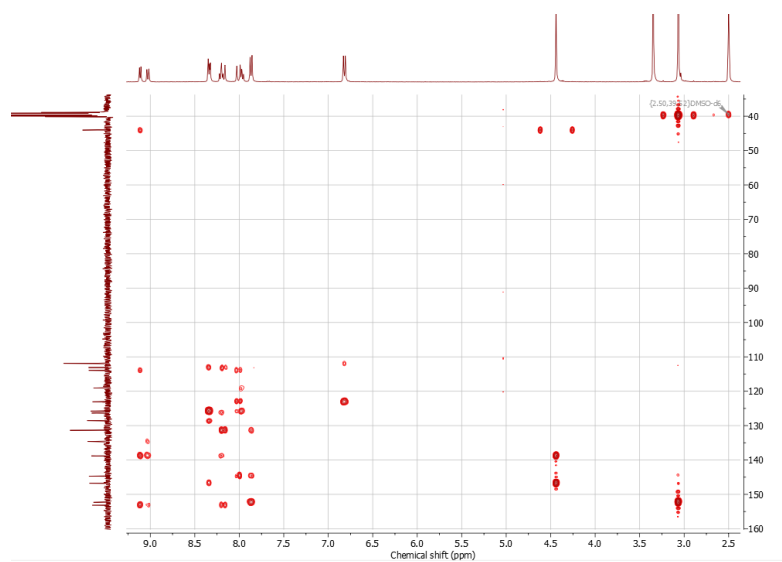

**(E)-4-(4-(diphenylamino)styryl)-1-methylquinolin-1-ium iodide (7b) in DMSO-d<sub>6</sub>**

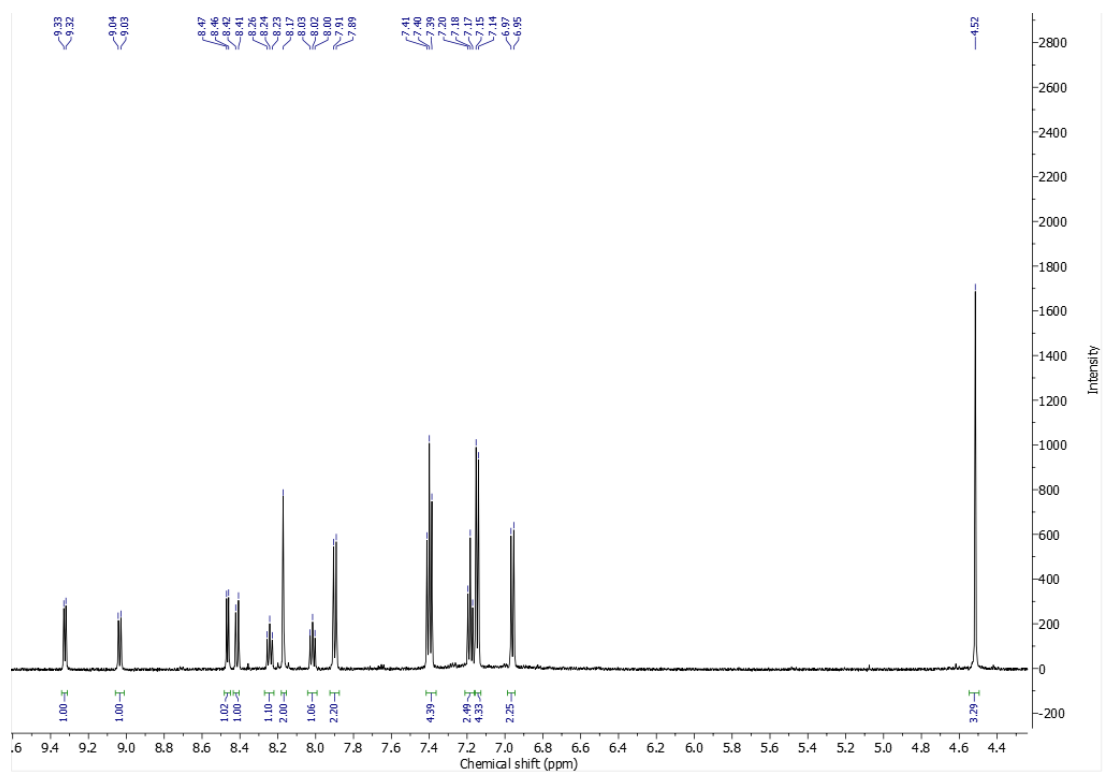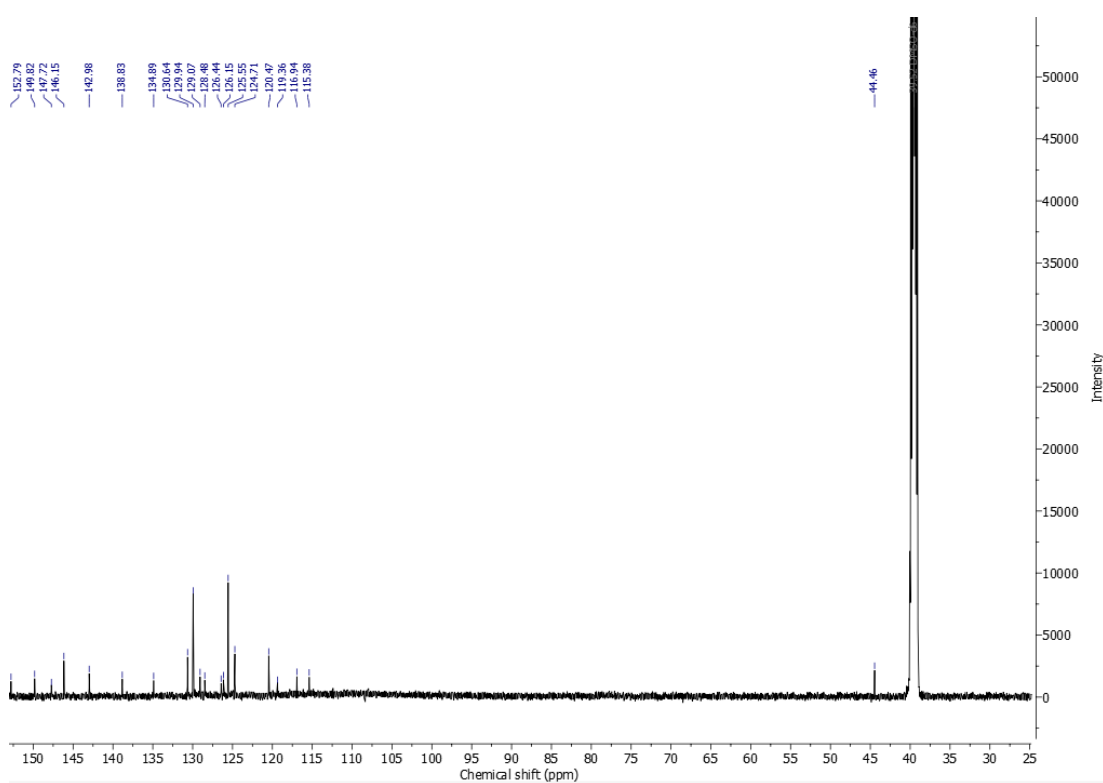

### ***COSY 7b***

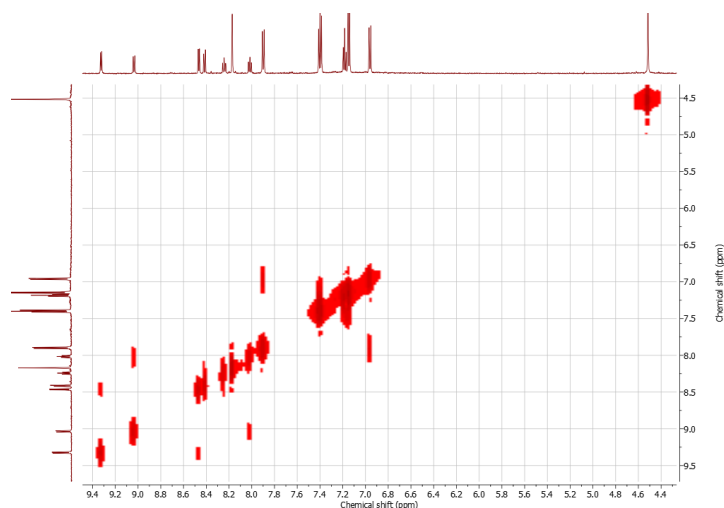

### ***HSQC 7b***

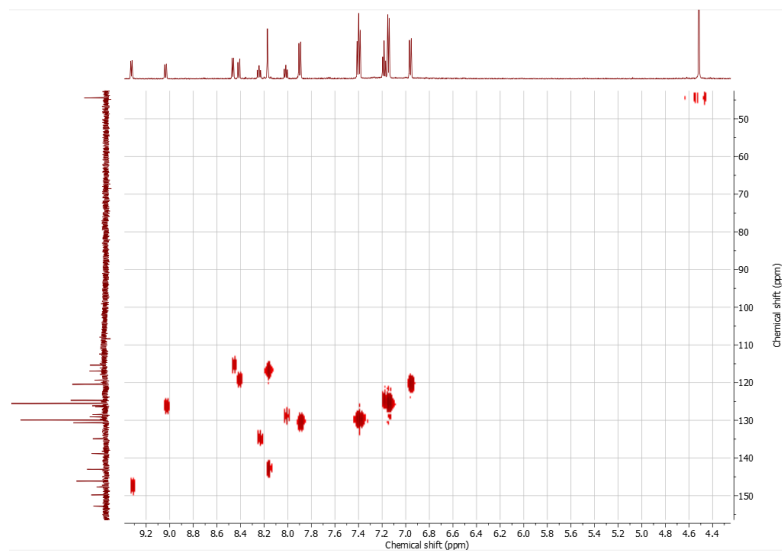

### ***HMBC 7b***

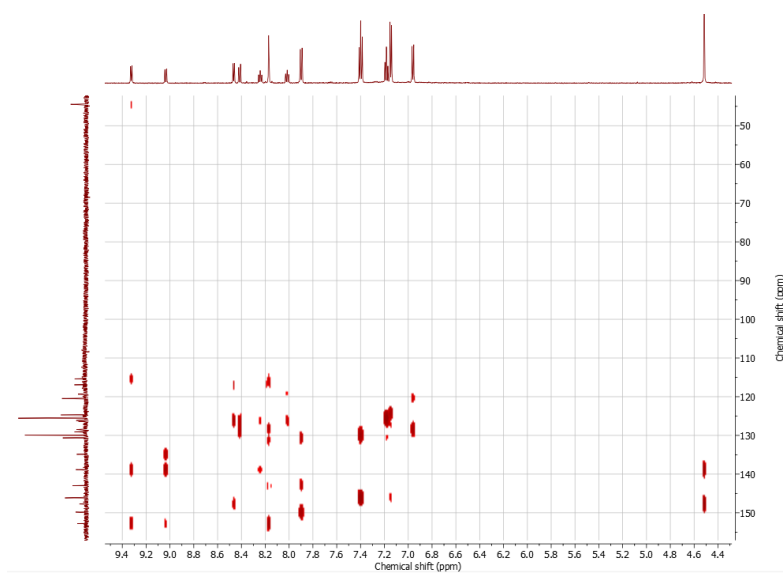

**(E)-1-methyl-4-(2-(1-propyl-1,2,3,4-tetrahydroquinolin-6-yl)vinyl)quinolin-1-ium iodide (8b) in DMSO-*d*<sub>6</sub>**

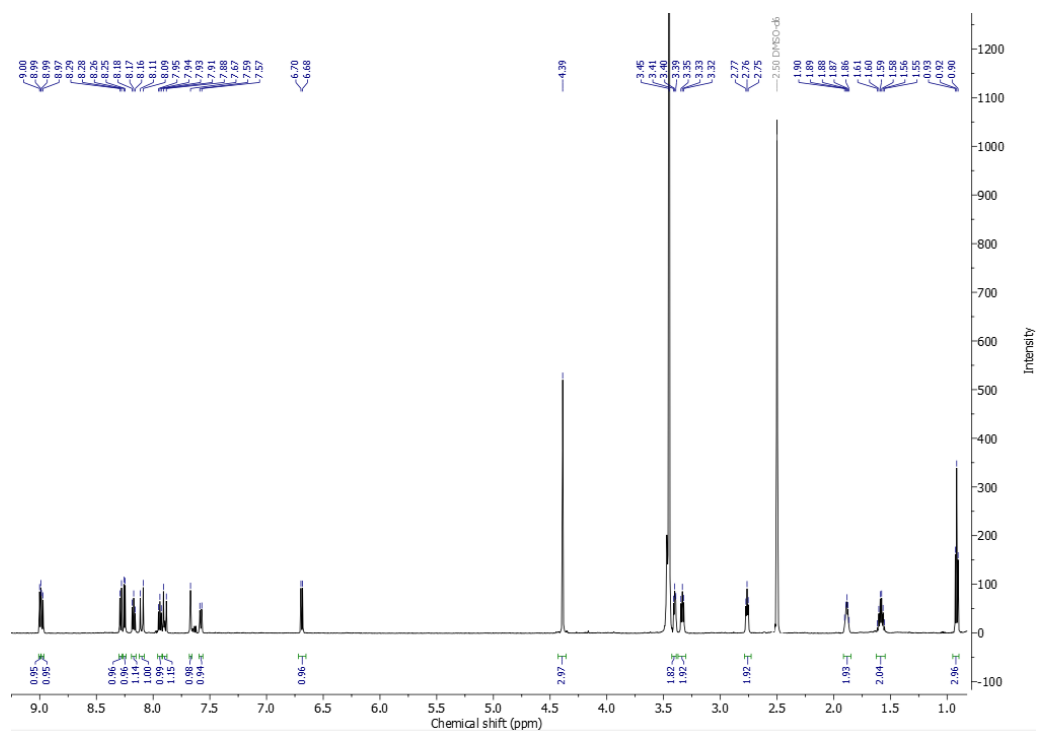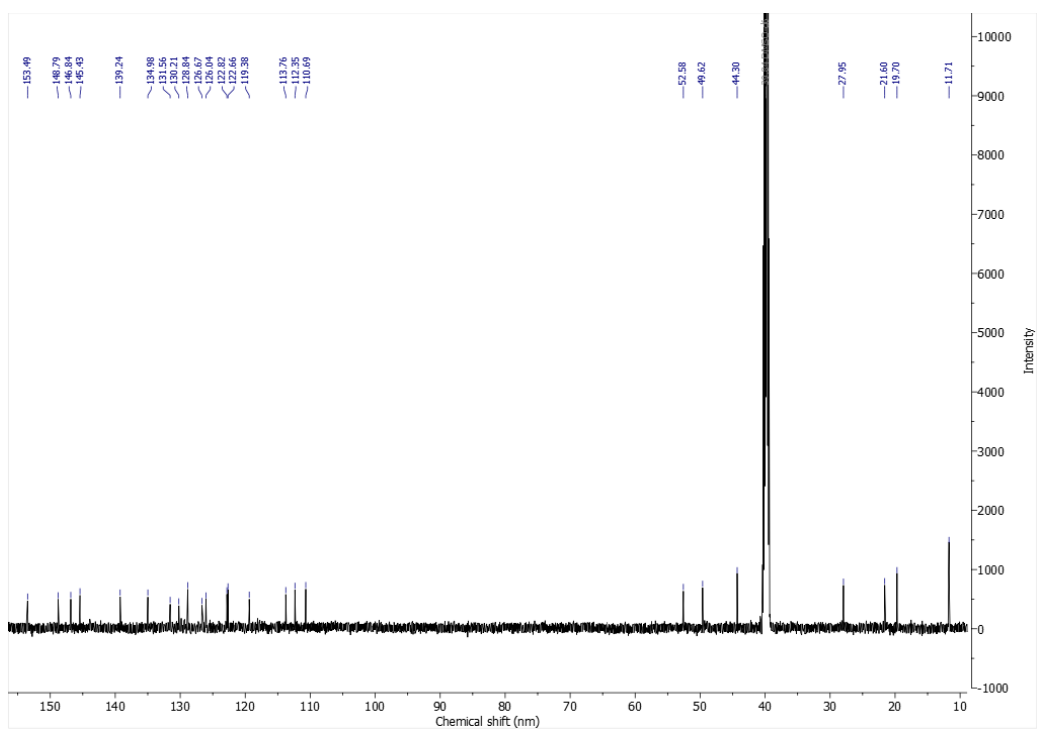

### *COSY 8b*

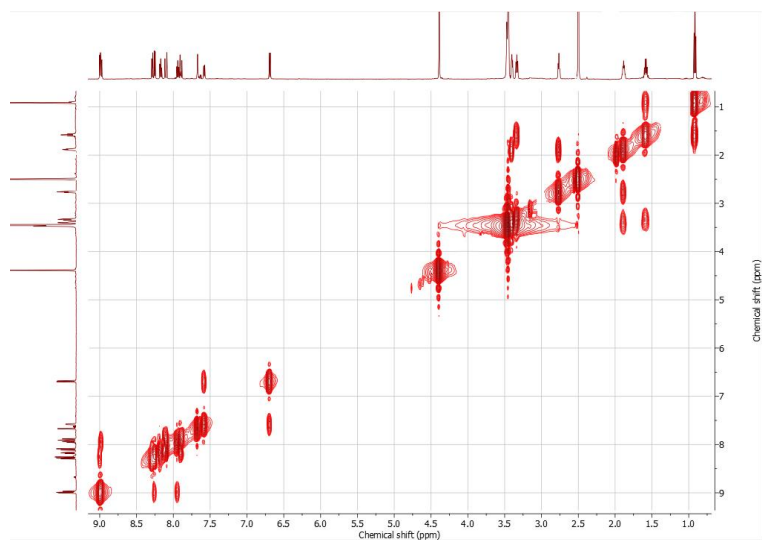

### *HSQC 8b*

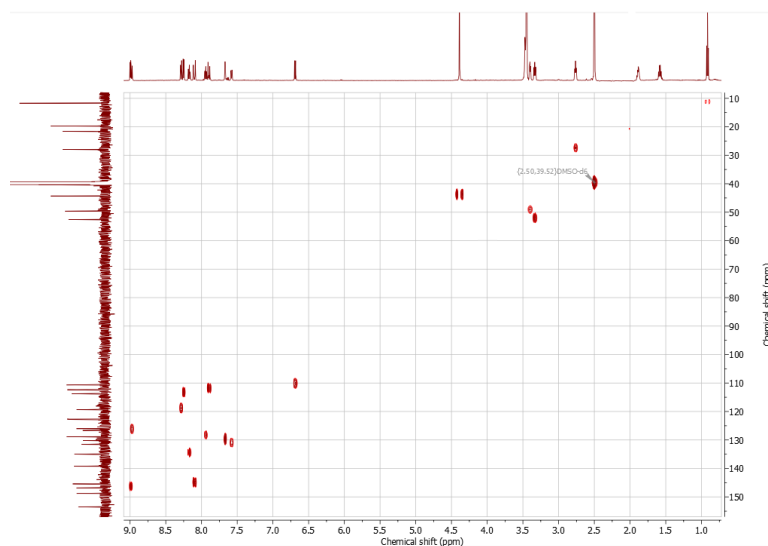

### *HMBC 8b*

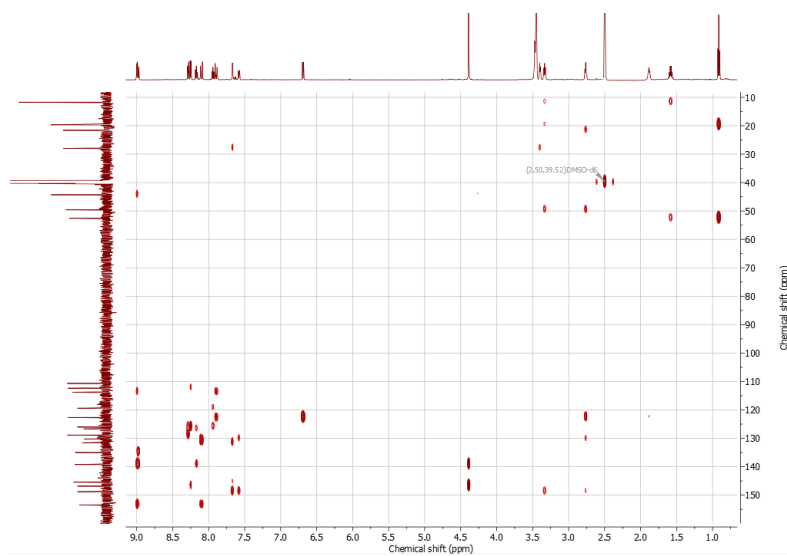

**(E)-1-methyl-4-(2-(2,3,6,7-tetrahydro-1H,5H-pyrido[3,2,1-ij]quinolin-9-yl)vinyl)quinolin-1-ium iodide (9b) in DMSO-*d*<sub>6</sub>**

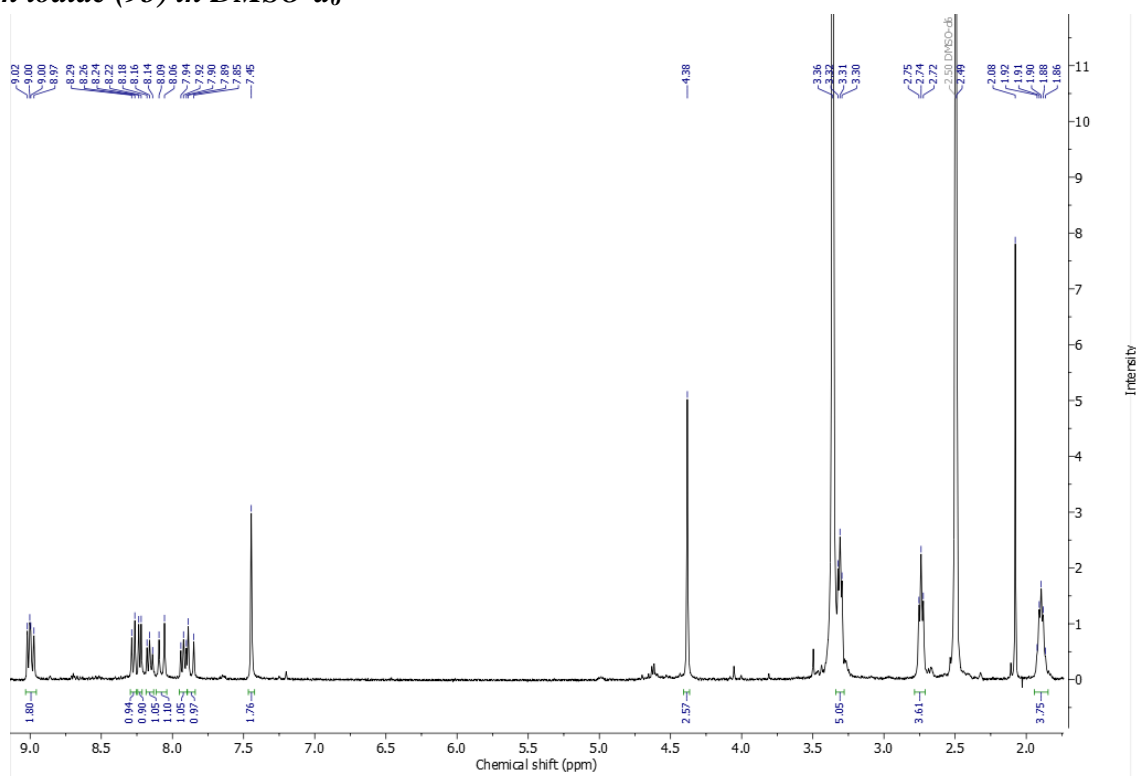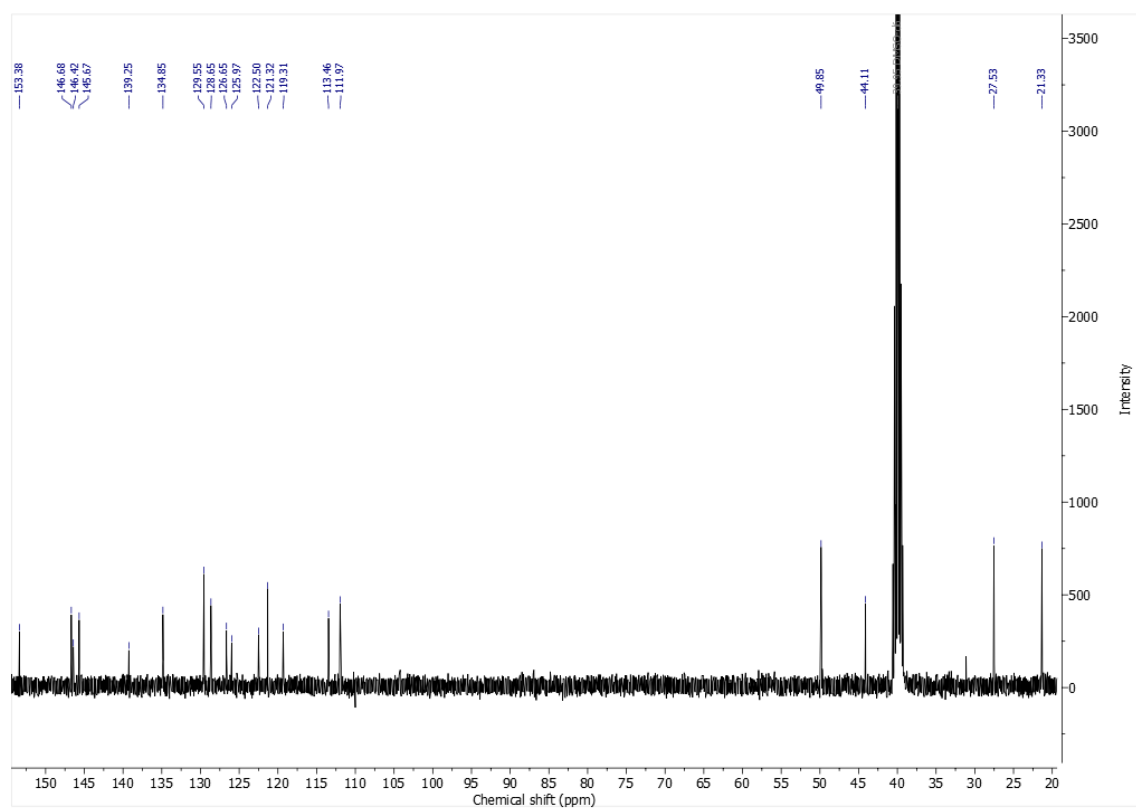

### ***COSY 9b***

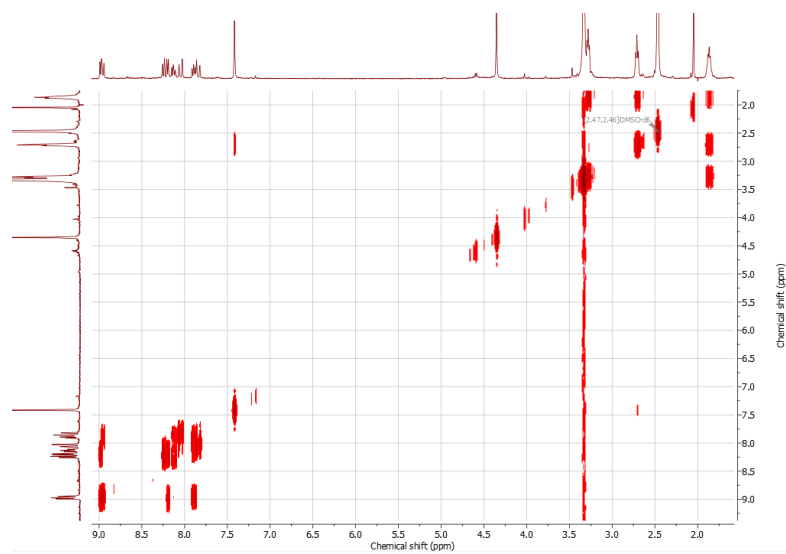

### ***HSQC 9b***

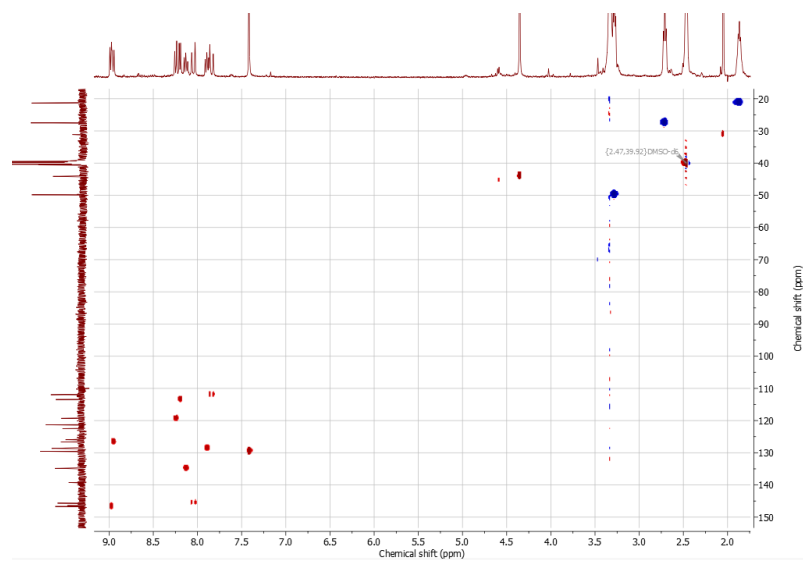

### ***HMBC 9b***

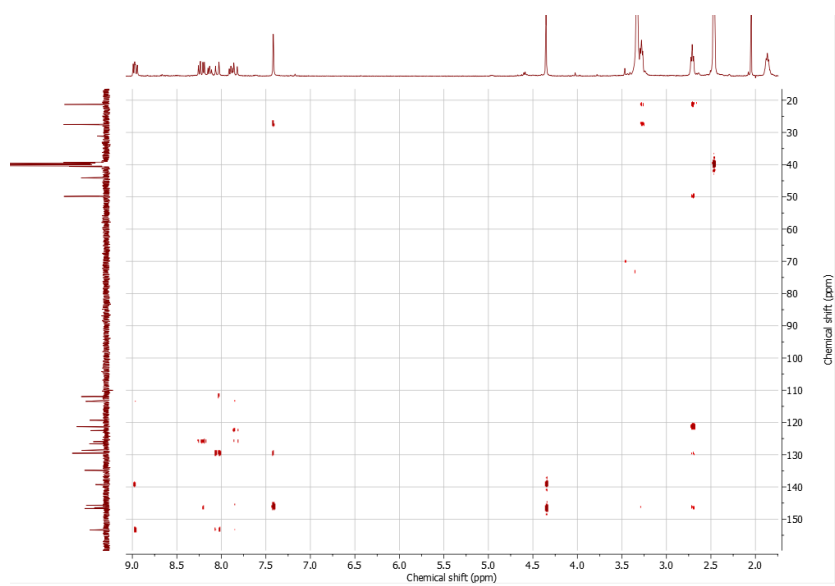



### 3. ESI MS studies

ESI MS spectra of **3a**.

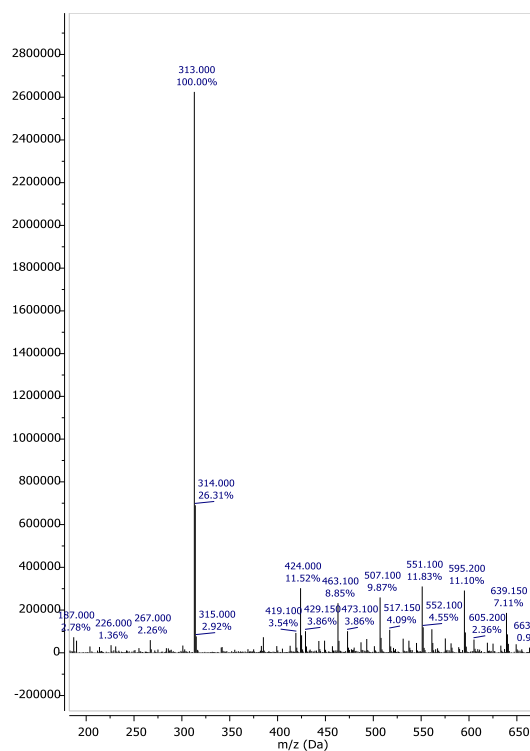

ESI MS spectra of **4a**.

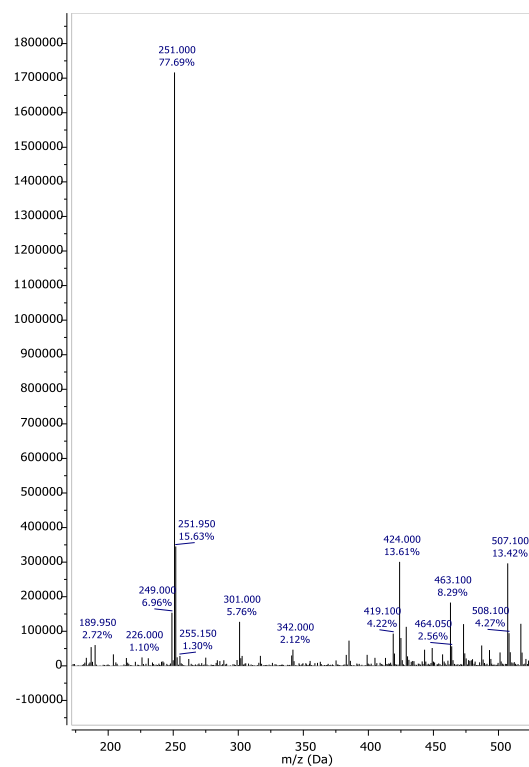

ESI MS spectra of **5a**.

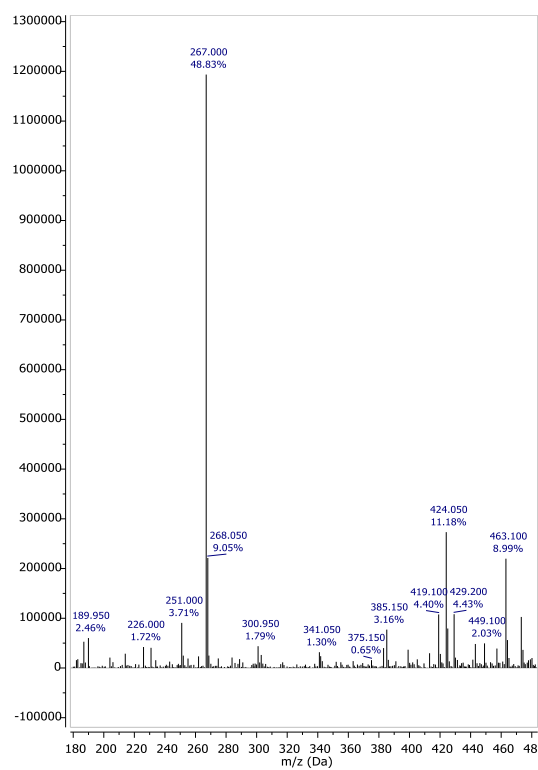

ESI MS spectra of **7a**.

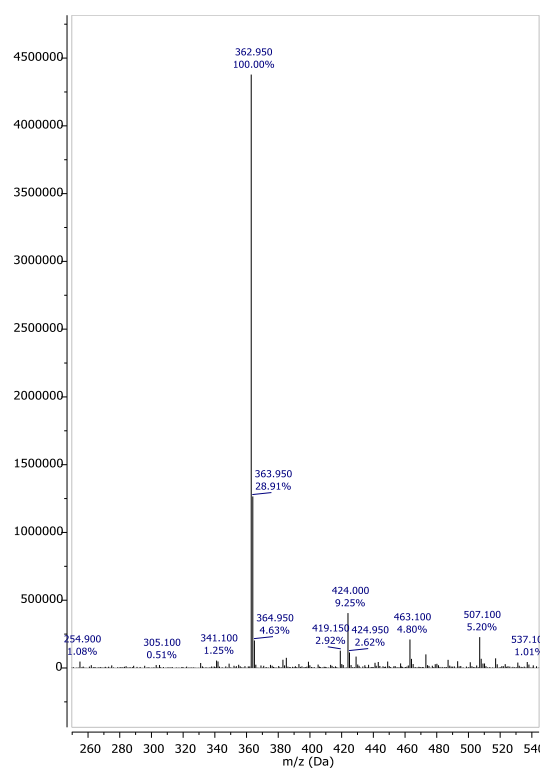

ESI MS spectra of **8a**.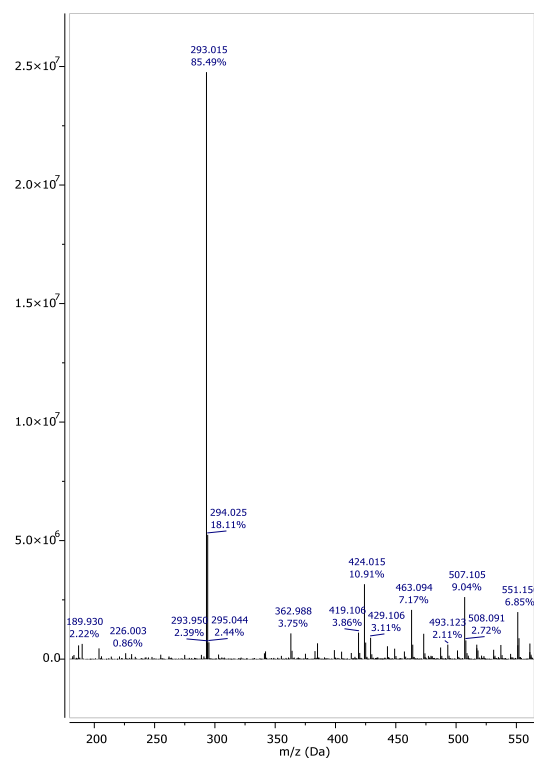ESI MS spectra of **9a**.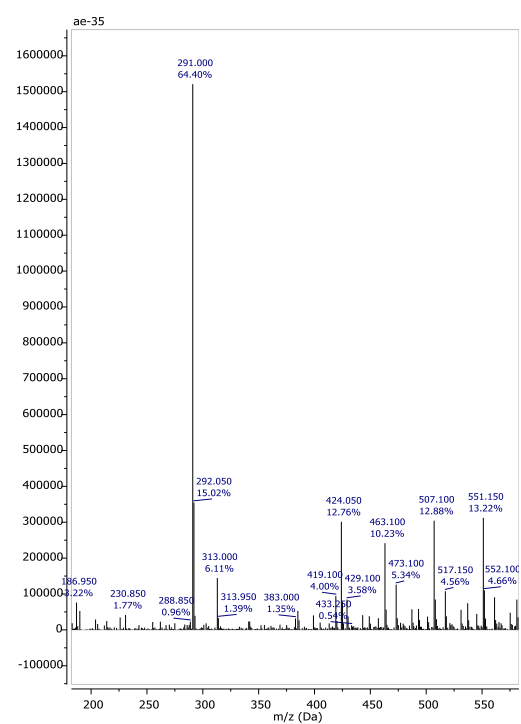ESI MS spectra of **3b**.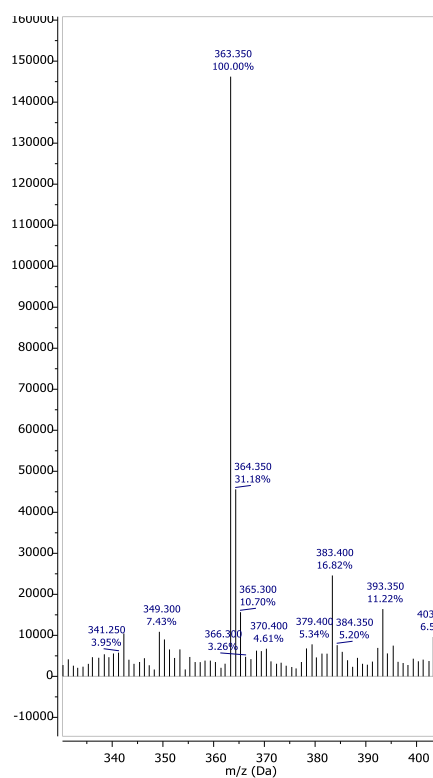ESI MS spectra of **4b**.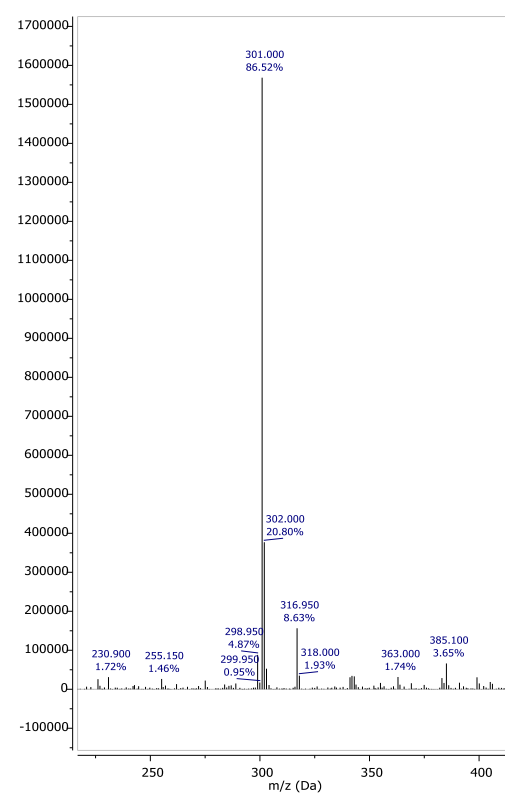

ESI MS spectra of **5b**.

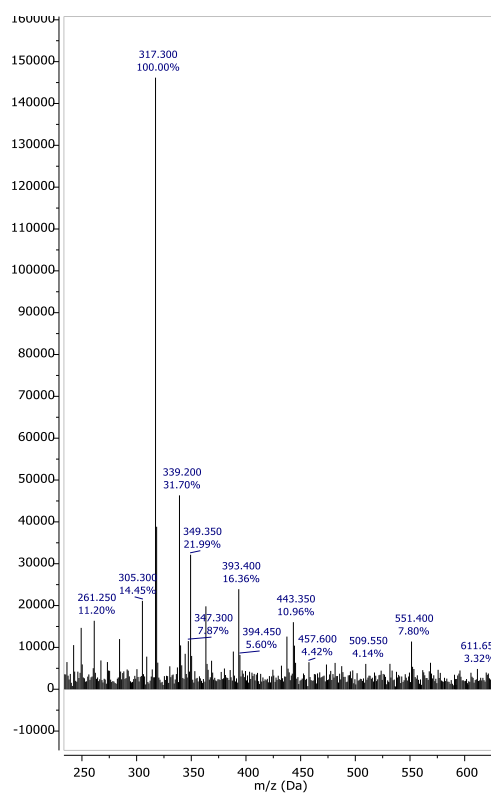

ESI MS spectra of **8b**.

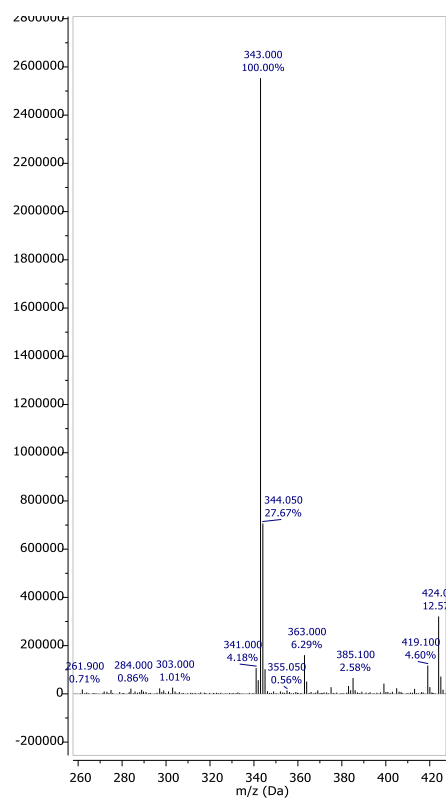

ESI MS spectra of **9b**.

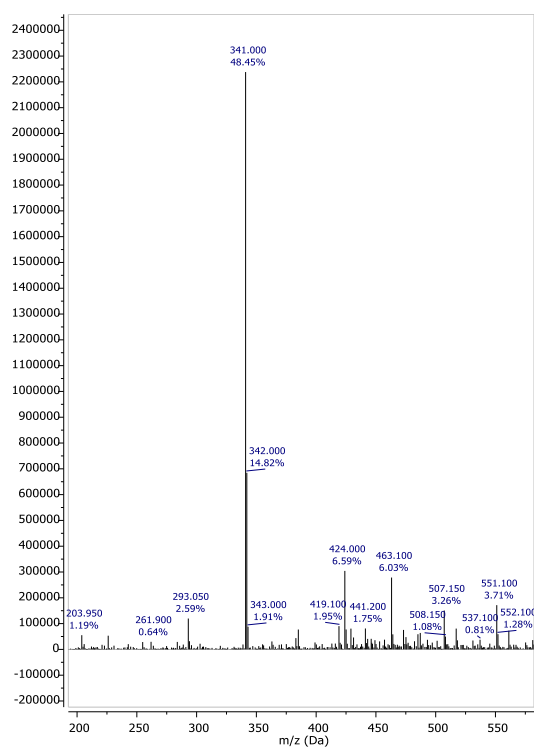

## 4. Optical studies

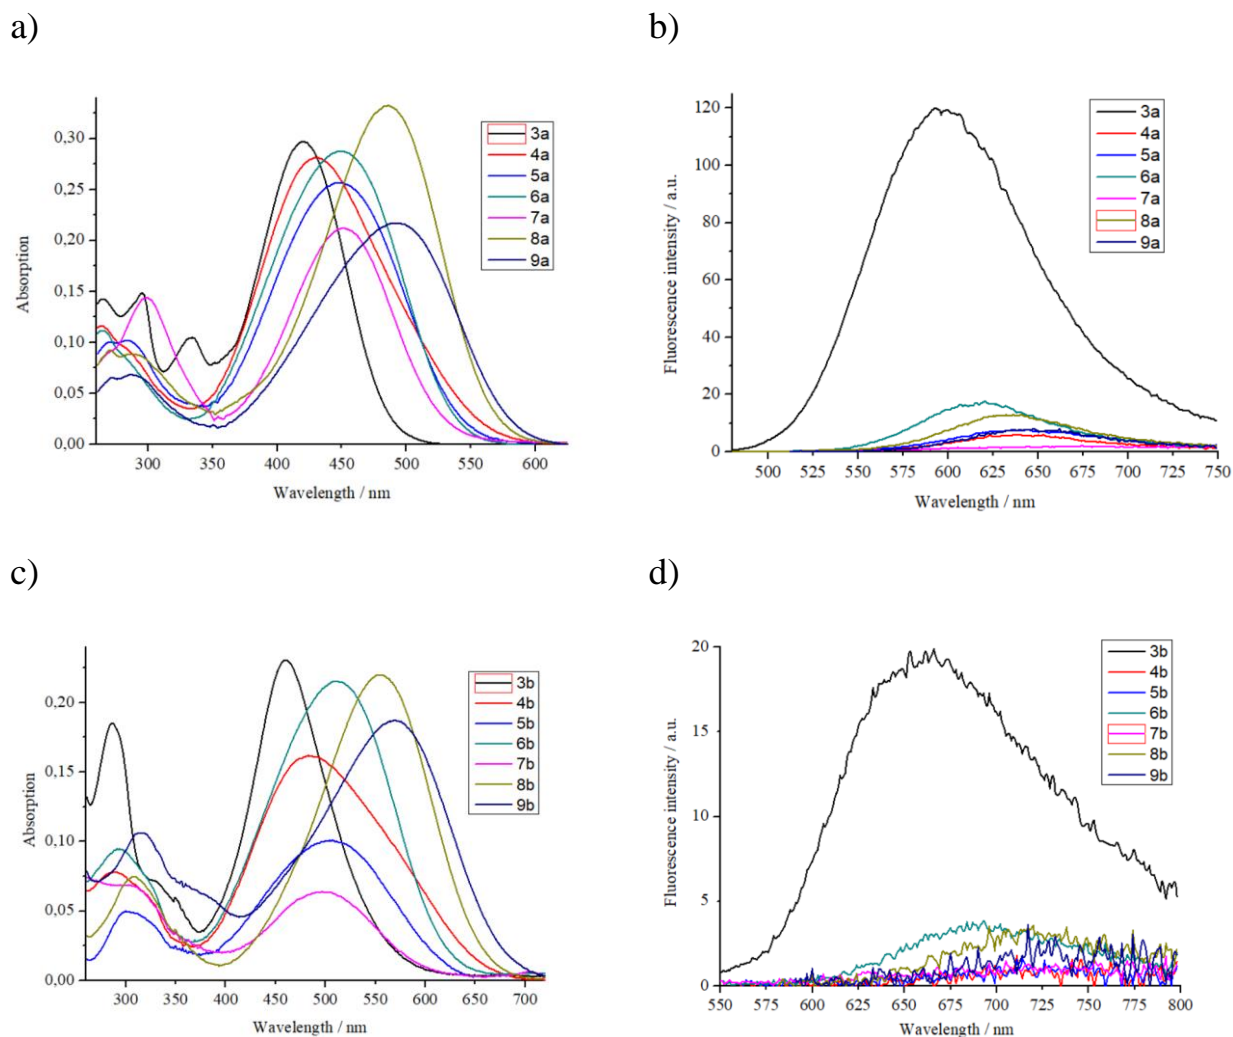

**Figure S2.** Absorption (a,c) and fluorescence (b,d) spectra of **3a**,**b**-**9a**,**b** in BPE buffer at pH=7,  $C_{3a-9b}=1 \cdot 10^{-5}$ .

**Table S1.** Optical characteristics of dyes **3a**-**9a** in different solvents.

| Solvents<br>( $\epsilon$ ) | <b>3a</b>     |                           |                          | <b>4a</b>     |                           |                          | <b>5a</b>     |                           |                          | <b>6a (DASPI)</b> |                           |                          |
|----------------------------|---------------|---------------------------|--------------------------|---------------|---------------------------|--------------------------|---------------|---------------------------|--------------------------|-------------------|---------------------------|--------------------------|
|                            | $\phi$<br>(%) | $\lambda_{\max}$<br>(abs) | $\lambda_{\max}$<br>(fl) | $\phi$<br>(%) | $\lambda_{\max}$<br>(abs) | $\lambda_{\max}$<br>(fl) | $\phi$<br>(%) | $\lambda_{\max}$<br>(abs) | $\lambda_{\max}$<br>(fl) | $\phi$<br>(%)     | $\lambda_{\max}$<br>(abs) | $\lambda_{\max}$<br>(fl) |
| Water<br>(78,4)            | 1.68          | 420                       | 594                      | 0.16          | 432                       | 642                      | 0.16          | 451                       | 653                      | 0.22              | 450                       | 620                      |
| Methanol<br>(32,6)         | 22.6          | 436                       | 591                      | 0.18          | 543                       | 683                      | 0.25          | 481                       | 632                      | 0.63              | 472                       | 616                      |
| Acetonitrile<br>(36)       | 25            | 430                       | 591                      | 0.09          | 483                       | 650                      | 0.15          | 473                       | 661                      | 0.36              | 470                       | 623                      |
| EtOAc<br>(6,02)            | 6.95          | 428                       | 588                      | 0.18          | 528                       | 663                      | 0.72          | 462                       | 613                      | 1.02              | 460                       | 605                      |
| DCM<br>(9,08)              | 22.3          | 480                       | 591                      | 1.89          | 589                       | 684                      | 0.98          | 531                       | 632                      | 8.78              | 527                       | 616                      |
| Solvents<br>( $\epsilon$ ) | <b>7a</b>     |                           |                          | <b>8a</b>     |                           |                          | <b>9a</b>     |                           |                          |                   |                           |                          |
|                            | $\phi$<br>(%) | $\lambda_{\max}$<br>(abs) | $\lambda_{\max}$<br>(fl) | $\phi$<br>(%) | $\lambda_{\max}$<br>(abs) | $\lambda_{\max}$<br>(fl) | $\phi$<br>(%) | $\lambda_{\max}$<br>(abs) | $\lambda_{\max}$<br>(fl) |                   |                           |                          |

|                      |      |     |     |      |     |     |      |     |     |
|----------------------|------|-----|-----|------|-----|-----|------|-----|-----|
| Water<br>(78,4)      | 0.06 | 451 | 650 | 0.23 | 486 | 632 | 0.14 | 491 | 645 |
| Methanol<br>(32,6)   | 0.29 | 466 | 700 | 0.48 | 506 | 635 | 0.3  | 519 | 640 |
| Acetonitrile<br>(36) | 0.16 | 460 | 740 | 0.28 | 500 | 636 | 0.22 | 515 | 622 |
| EtOAc<br>(6,02)      | 1.13 | 458 | 649 | 1.41 | 491 | 610 | 0.97 | 500 | 624 |
| DCM<br>(9,08)        | 2.21 | 518 | 714 | 1.8  | 555 | 633 | 0.63 | 574 | 644 |

**Table S2.** Optical characteristics of dyes **3b-9b** in different solvents.

| Solvents<br>( $\epsilon$ ) | <b>3b</b>     |                           |                          | <b>4b</b>     |                           |                          | <b>5b</b>     |                           |                          | <b>6b</b>     |                           |                          |
|----------------------------|---------------|---------------------------|--------------------------|---------------|---------------------------|--------------------------|---------------|---------------------------|--------------------------|---------------|---------------------------|--------------------------|
|                            | $\phi$<br>(%) | $\lambda_{\max}$<br>(abs) | $\lambda_{\max}$<br>(fl) |
| Water<br>(78,4)            | 0.12          | 462                       | 658                      | 0.03          | 484                       | 726                      | 0.05          | 505                       | 718                      | 0.05          | 510                       | 694                      |
| Methanol<br>(32,6)         | 6.44          | 484                       | 654                      | 0.09          | 566                       | 713                      | 0.13          | 547                       | 709                      | 0.18          | 543                       | 683                      |
| Acetonitrile<br>(36)       | 6.39          | 483                       | 667                      | -             | 563                       | -                        | -             | 539                       | -                        | 0.09          | 536                       | 698                      |
| EtOAc<br>(6,02)            | 3.74          | 479                       | 649                      | 0.25          | 545                       | 698                      | 0.21          | 533                       | 702                      | 0.18          | 528                       | 663                      |
| DCM<br>(9,08)              | 39.5          | 534                       | 646                      | 0.28          | 620                       | 717                      | 0.44          | 595                       | 715                      | 1.89          | 589                       | 684                      |
| Solvents<br>( $\epsilon$ ) | <b>7b</b>     |                           |                          | <b>8b</b>     |                           |                          | <b>9b</b>     |                           |                          |               |                           |                          |
|                            | $\phi$<br>(%) | $\lambda_{\max}$<br>(abs) | $\lambda_{\max}$<br>(fl) | $\phi$<br>(%) | $\lambda_{\max}$<br>(abs) | $\lambda_{\max}$<br>(fl) | $\phi$<br>(%) | $\lambda_{\max}$<br>(abs) | $\lambda_{\max}$<br>(fl) |               |                           |                          |
| Water<br>(78,4)            | 0.04          | 497                       | 728                      | 0.07          | 554                       | 711                      | 0.05          | 569                       | 730                      |               |                           |                          |
| Methanol<br>(32,6)         | -             | 521                       | -                        | 0.19          | 579                       | 705                      | 0.22          | 597                       | 703                      |               |                           |                          |
| Acetonitrile<br>(36)       | -             | 515                       | -                        | 0.11          | 575                       | 731                      | 0.18          | 594                       | 622                      |               |                           |                          |
| EtOAc<br>(6,02)            | -             | 509                       | -                        | 0.49          | 561                       | 678                      | 0.74          | 571                       | 699                      |               |                           |                          |
| DCM<br>(9,08)              | -             | 576                       | -                        | 0.55          | 626                       | 709                      | 1.52          | 645                       | 605                      |               |                           |                          |

**Table S3.** Optical characteristics of dyes **3a,b-9a,b** in glycerol.

| Compound             | $\lambda^{\text{abs}}$ nm | $\lambda^{\text{fl}}$ nm | $\phi^{\text{fl}}$ (%) |
|----------------------|---------------------------|--------------------------|------------------------|
| <b>3a</b>            | 439                       | 591                      | 42.1                   |
| <b>4a</b>            | 488                       | 647                      | 15.2                   |
| <b>5a</b>            | 483                       | 636                      | 5.82                   |
| <b>6a</b><br>(DASPI) | 481                       | 617                      | 13.4                   |

|           |     |     |      |
|-----------|-----|-----|------|
| <b>7a</b> | 471 | 653 | 4.61 |
| <b>8a</b> | 513 | 626 | 18.4 |
| <b>9a</b> | 524 | 642 | 5.54 |
| <b>3b</b> | 488 | 647 | 15.2 |
| <b>4b</b> | 576 | 701 | 0.89 |
| <b>5b</b> | 552 | 718 | 1.12 |
| <b>6b</b> | 488 | 647 | 15.2 |
| <b>7b</b> | 526 | 709 | 1.7  |
| <b>8b</b> | 588 | 708 | 1.9  |
| <b>9b</b> | 607 | 710 | 1.28 |

a)

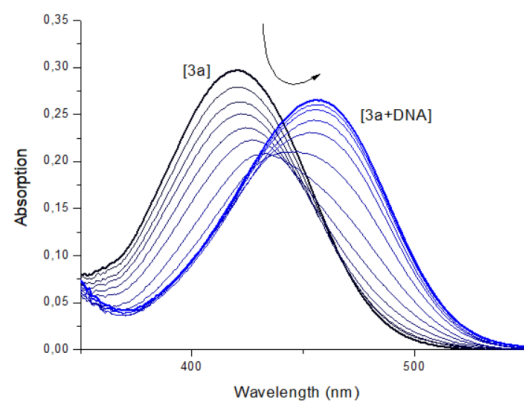

b)

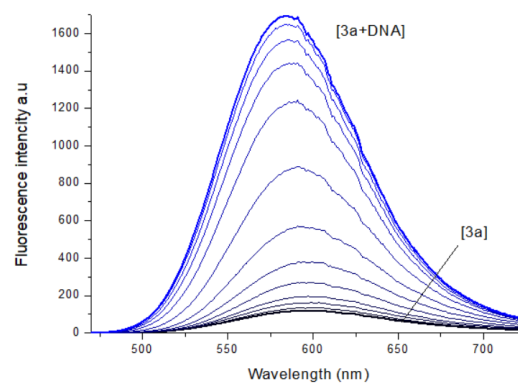

**Figure S3.** Spectrophotometric (a) and fluorometric (b) titration of dye **3a** with ds-DNA solution; pH=7,  $C_{3a}=1 \cdot 10^{-5}$  M,  $C_{ds-DNA}=0-0.5 \cdot 10^{-3}$  M b.p.

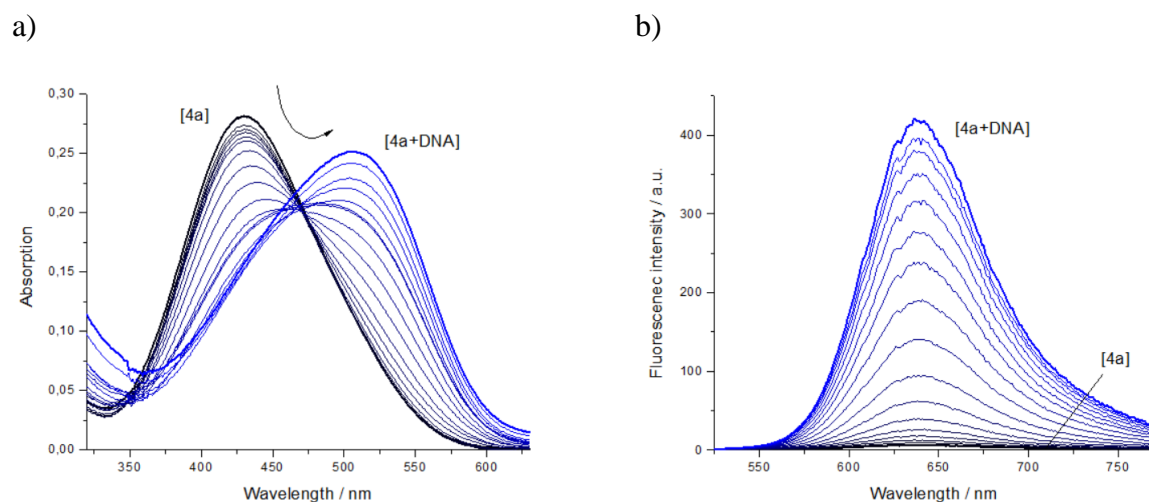

**Figure S4.** Spectrophotometric (a) and fluorometric (b) titration of dye **4a** with ds-DNA solution; pH=7,  $C_{4a}=1 \cdot 10^{-5}$  M,  $C_{ds-DNA}=0-0.7 \cdot 10^{-3}$  M b.p.

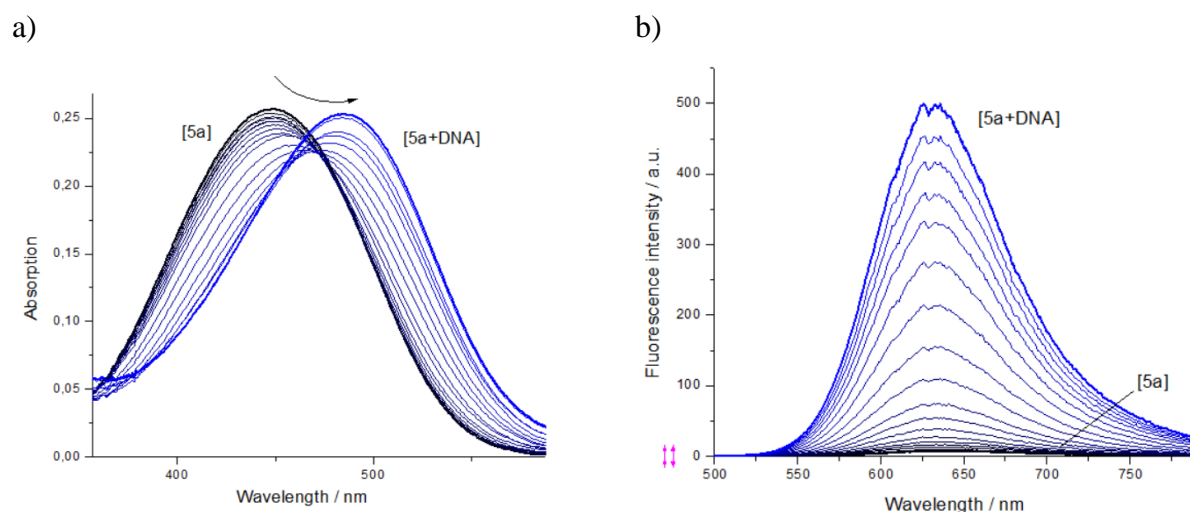

**Figure S5.** Spectrophotometric (a) and fluorometric (b) titration of dye **5a** with ds-DNA solution; pH=7,  $C_{5a}=1 \cdot 10^{-5}$  M,  $C_{ds-DNA}=0-0.65 \cdot 10^{-3}$  M b.p.

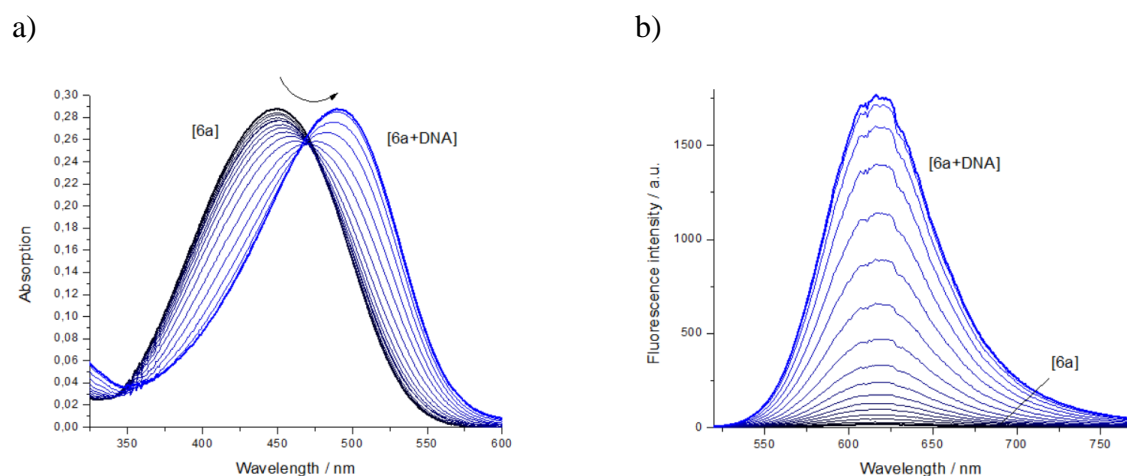

**Figure S6.** Spectrophotometric (a) and fluorometric (b) titration of dye **6a** (DASPI) with ds-DNA solution; pH=7,  $C_{6a}=1 \cdot 10^{-5}$  M,  $C_{ds-DNA}=0-0.7 \cdot 10^{-3}$  M b.p.

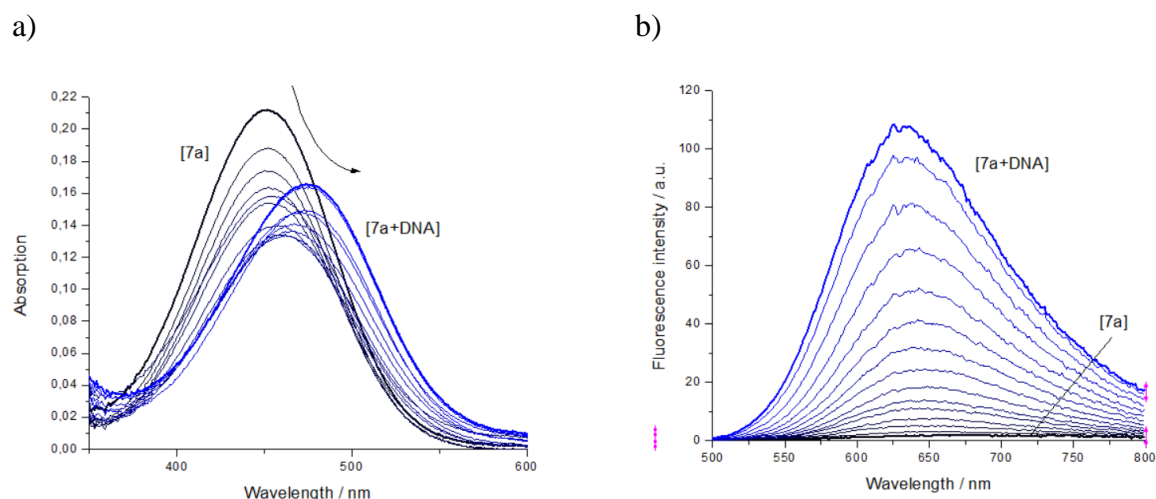

**Figure S7.** Spectrophotometric (a) and fluorometric (b) titration of dye **7a** with ds-DNA solution; pH=7,  $C_{7a}=1\cdot 10^{-5}$  M,  $C_{ds-DNA}=0-0.65\cdot 10^{-3}$  M b.p.

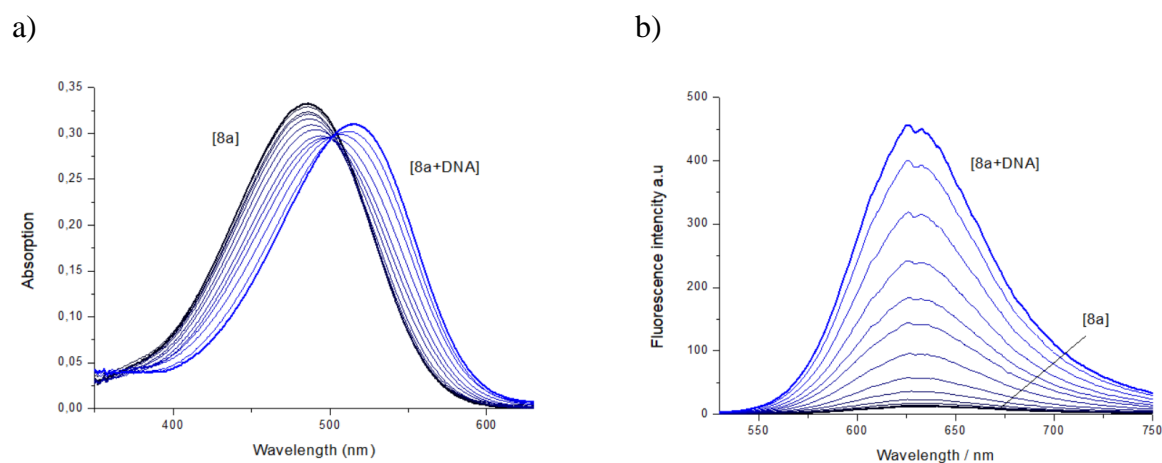

**Figure S8.** Spectrophotometric (a) and fluorometric (b) titration of dye **8a** with ds-DNA solution; pH=7,  $C_{8a}=1\cdot 10^{-5}$  M,  $C_{ds-DNA}=0-0.7\cdot 10^{-3}$  M b.p.

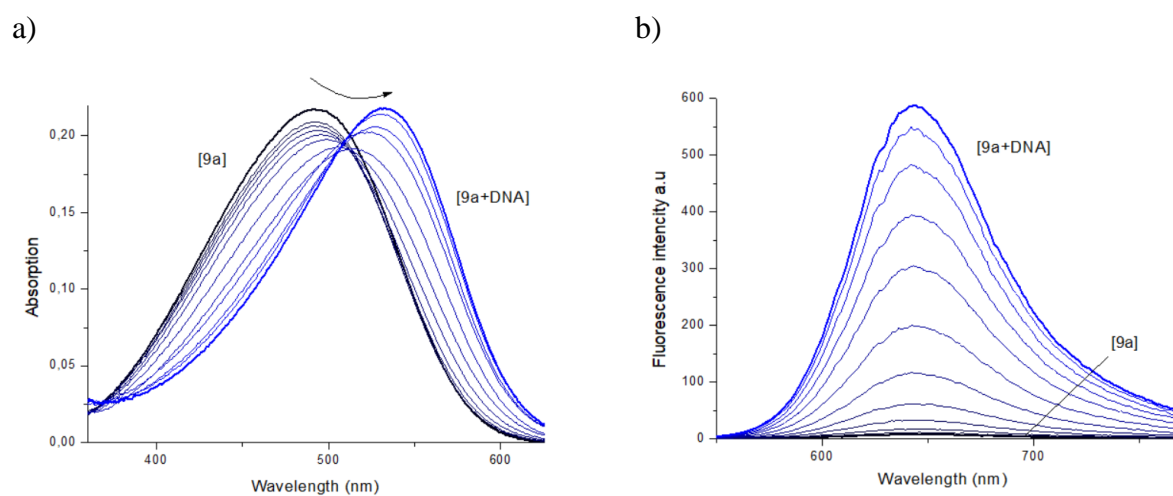

**Figure S9.** Spectrophotometric (a) and fluorometric (b) titration of dye **9a** with ds-DNA solution; pH=7,  $C_{9a}=1\cdot 10^{-5}$  M,  $C_{ds-DNA}=0-0.73\cdot 10^{-3}$  M b.p.



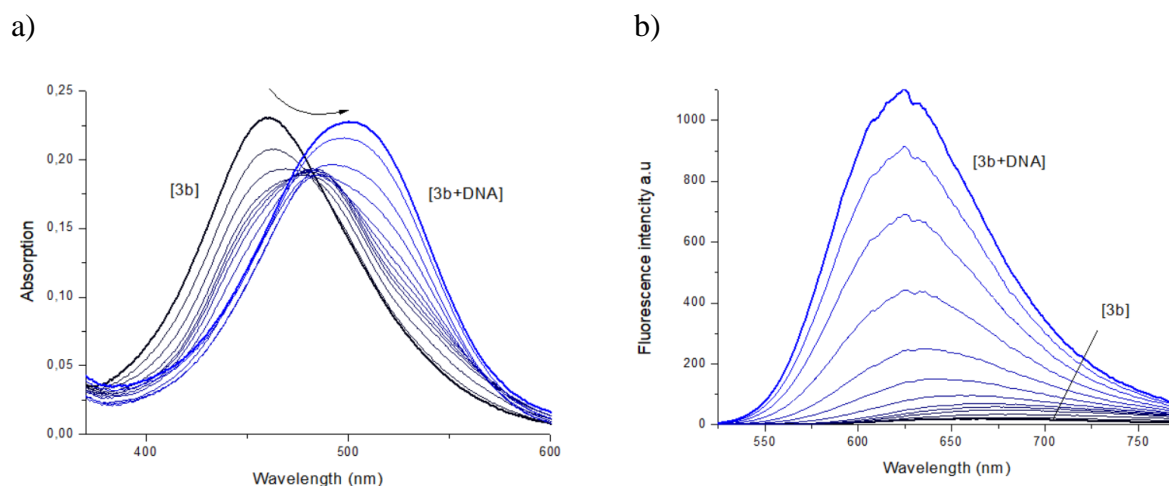

**Figure S10.** Spectrophotometric (a) and fluorometric (b) titration of dye **3b** with ds-DNA solution; pH=7,  $C_{3b}=1 \cdot 10^{-5}$  M,  $C_{ds-DNA}=0-0.66 \cdot 10^{-3}$  M b.p.

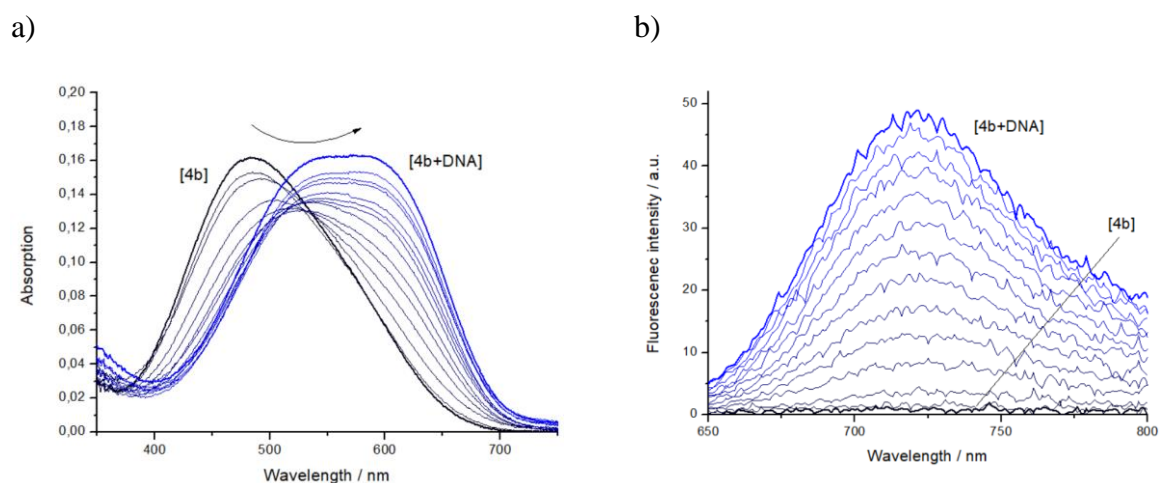

**Figure S11.** Spectrophotometric (a) and fluorometric (b) titration of dye **4b** with ds-DNA solution; pH=7,  $C_{4b}=1 \cdot 10^{-5}$  M,  $C_{ds-DNA}=0-0.64 \cdot 10^{-3}$  M b.p.

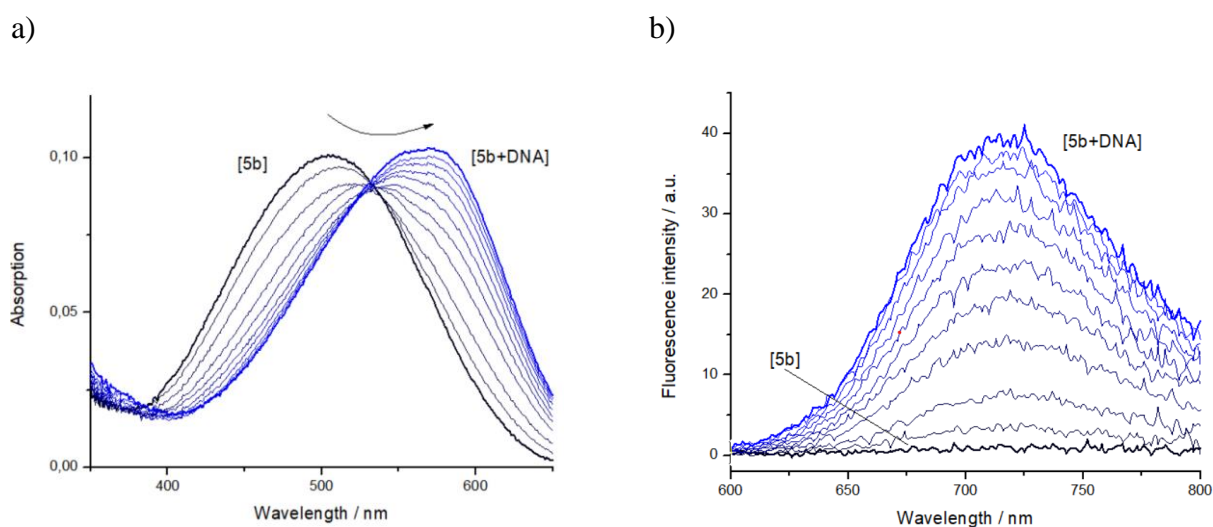

**Figure S12.** Spectrophotometric (a) and fluorometric (b) titration of dye **5b** with ds-DNA solution; pH=7,  $C_{5b}=1 \cdot 10^{-5}$  M,  $C_{ds-DNA}=0-0.12 \cdot 10^{-3}$  M b.p.

a)

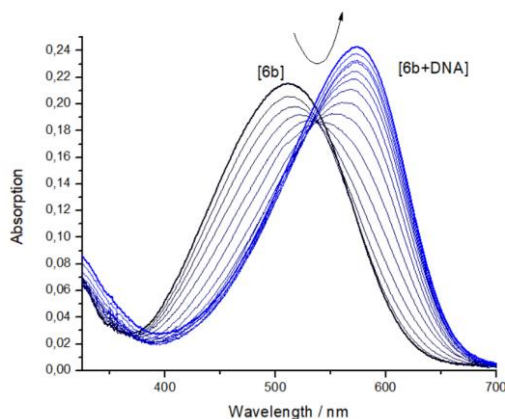

b)

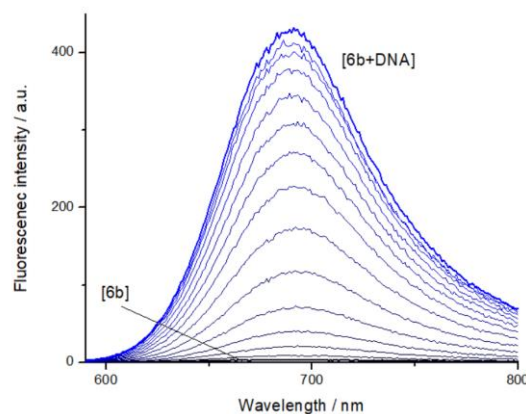

**Figure S13.** Spectrophotometric (a) and fluorometric (b) titration of dye **6b** with ds-DNA solution; pH=7,  $C_{6b}=1\cdot 10^{-5}$  M,  $C_{ds-DNA}=0-0.7\cdot 10^{-3}$  M b.p.

a)

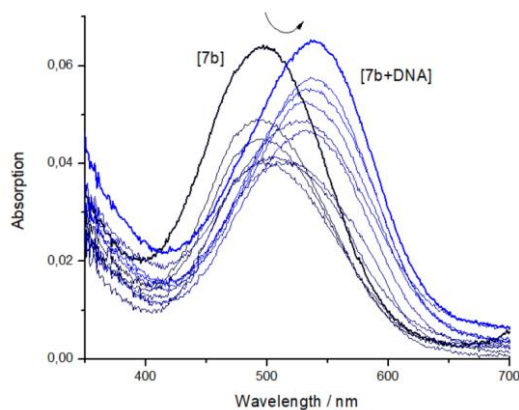

b)

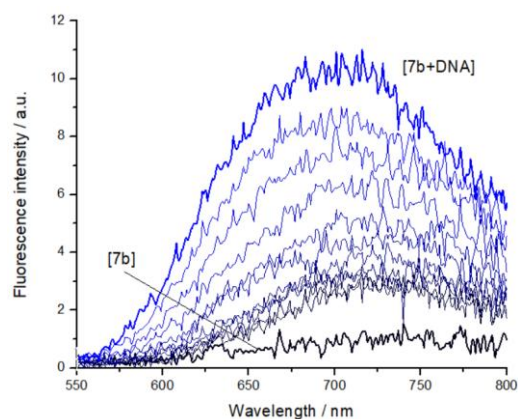

**Figure S14.** Spectrophotometric (a) and fluorometric (b) titration of dye **7b** with ds-DNA solution; pH=7,  $C_{7b}=1\cdot 10^{-5}$  M,  $C_{ds-DNA}=0-0.78\cdot 10^{-3}$  M b.p.

a)

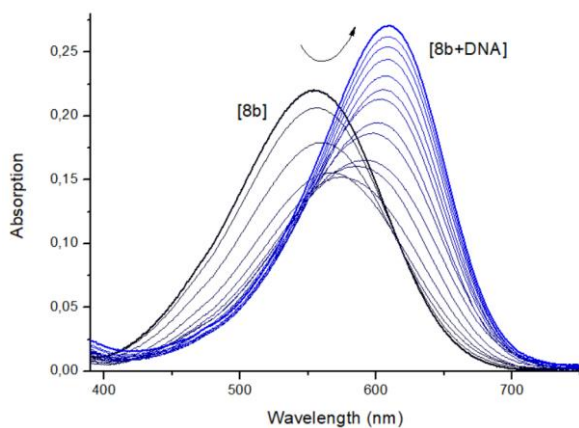

b)

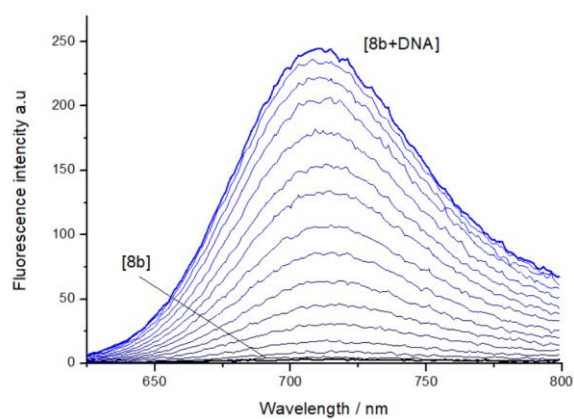

**Figure S15.** Spectrophotometric (a) and fluorometric (b) titration of dye **8b** with ds-DNA solution; pH=7,  $C_{8b}=1\cdot 10^{-5}$  M,  $C_{ds-DNA}=0-0.74\cdot 10^{-3}$  M b.p.

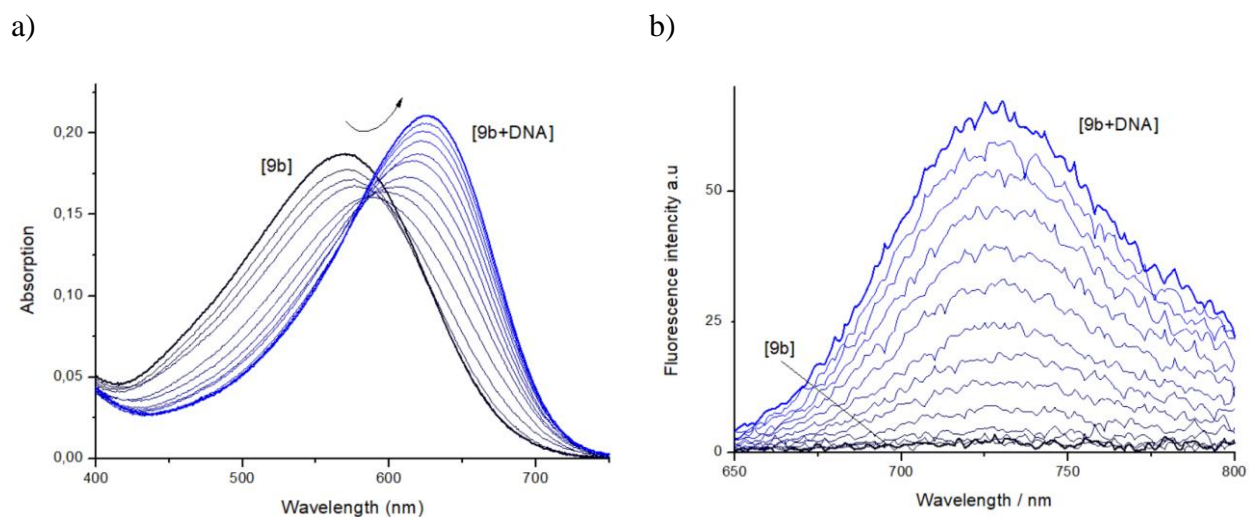

**Figure S16.** Spectrophotometric (a) and fluorometric (b) titration of dye **9b** with ds-DNA solution; pH=7,  $C_{9b}=1 \cdot 10^{-5}$  M,  $C_{ds-DNA}=0-0.14 \cdot 10^{-3}$  M b.p.

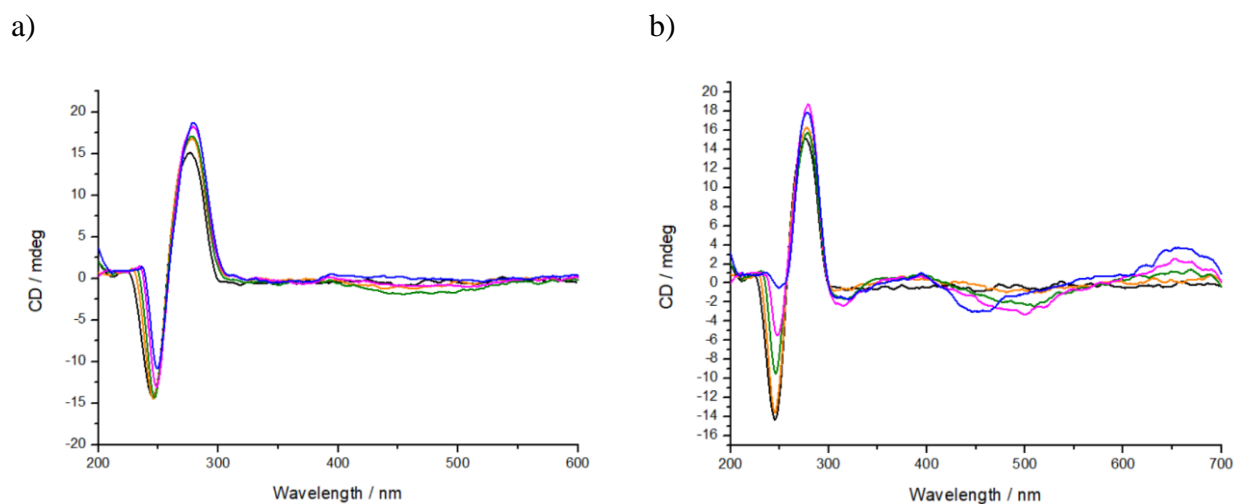

**Figure S17.** Circular dichroism spectra of ct-DNA ( $C_{DNA} = 0.1$  mM b.p.) in the absence and presence of styryl dyes **4a** (a) and **4b** (b) at different LDR  $C_{Dye}/C_{DNA}$ : 0 (black); 0.1 (orange); 0.3 (green); 0.6 (magenta); 1 (blue).

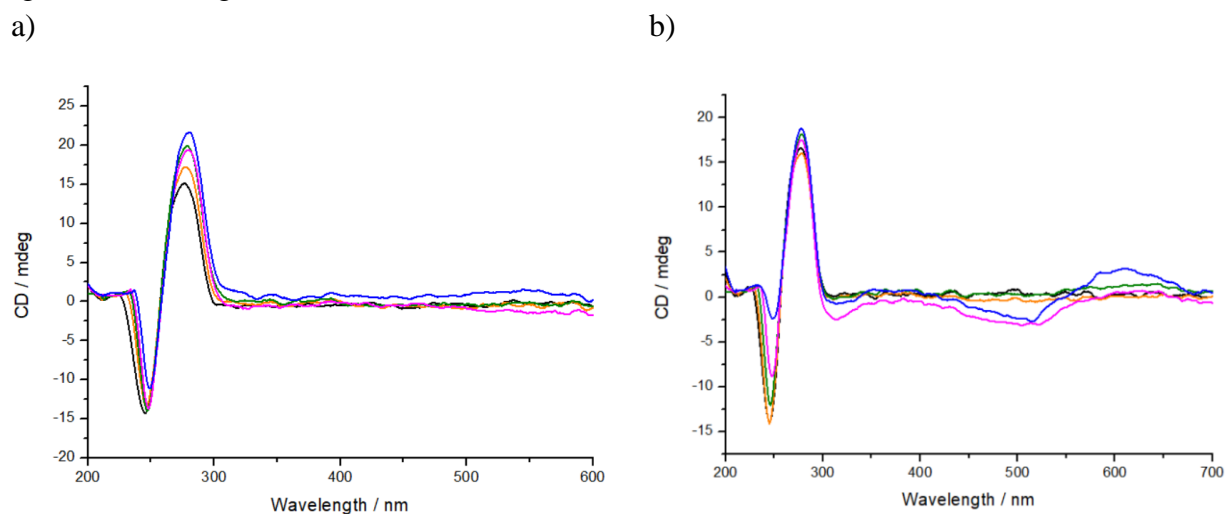

**Figure S18.** Circular dichroism spectra of ct-DNA ( $C_{\text{DNA}} = 0.1 \text{ mM b.p.}$ ) in the absence and presence of styryl dyes **5a** (a) and **5b** (b) at different LDR  $C_{\text{Dye}}/C_{\text{DNA}}$ : 0 (black); 0.1 (orange); 0.3 (green); 0.6 (magenta); 1 (blue).

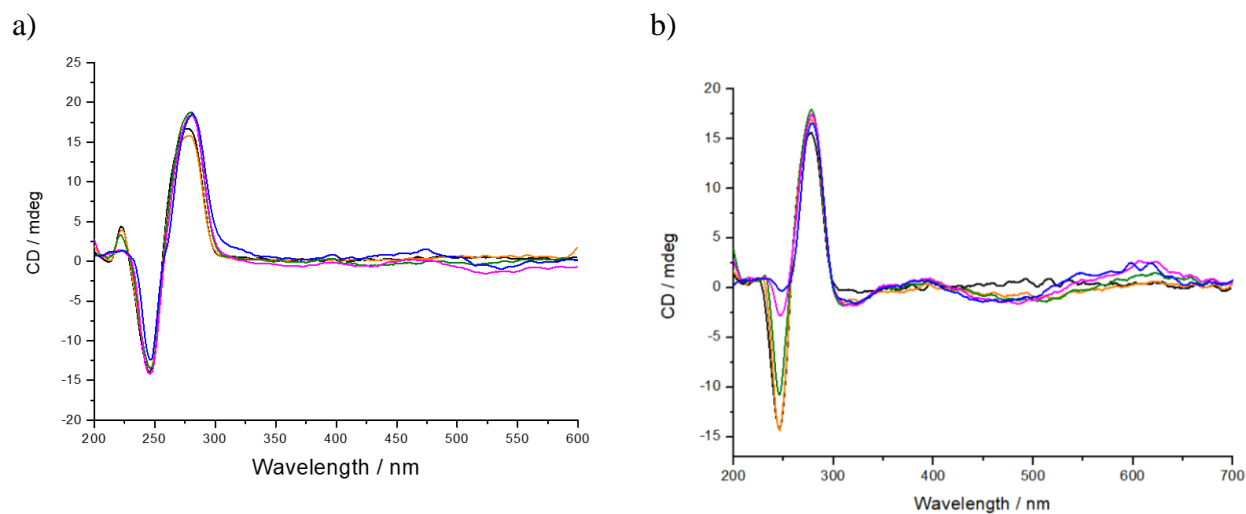

**Figure S19.** Circular dichroism spectra of ct-DNA ( $C_{\text{DNA}} = 0.1 \text{ mM b.p.}$ ) in the absence and presence of styryl dyes **6a** (DASPI) (a) and **6b** (b) at different LDR  $C_{\text{Dye}}/C_{\text{DNA}}$ : 0 (black); 0.1 (orange); 0.3 (green); 0.6 (magenta); 1 (blue).

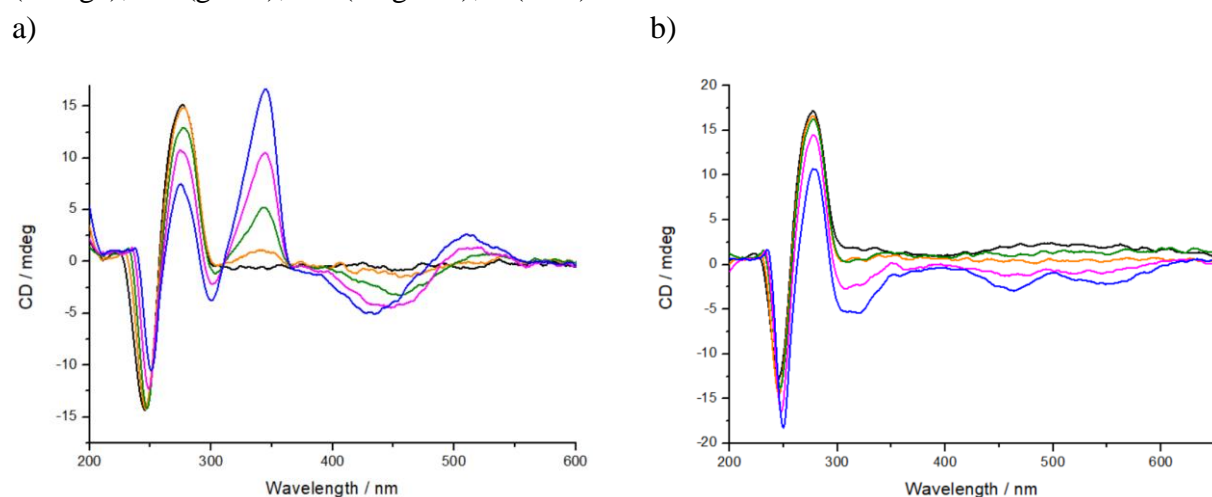

**Figure S20.** Circular dichroism spectra of ct-DNA ( $C_{\text{DNA}} = 0.1 \text{ mM b.p.}$ ) in the absence and presence of styryl dyes **7a** (a) and **7b** (b) at different LDR  $C_{\text{Dye}}/C_{\text{DNA}}$ : 0 (black); 0.1 (orange); 0.3 (green); 0.6 (magenta); 1 (blue).

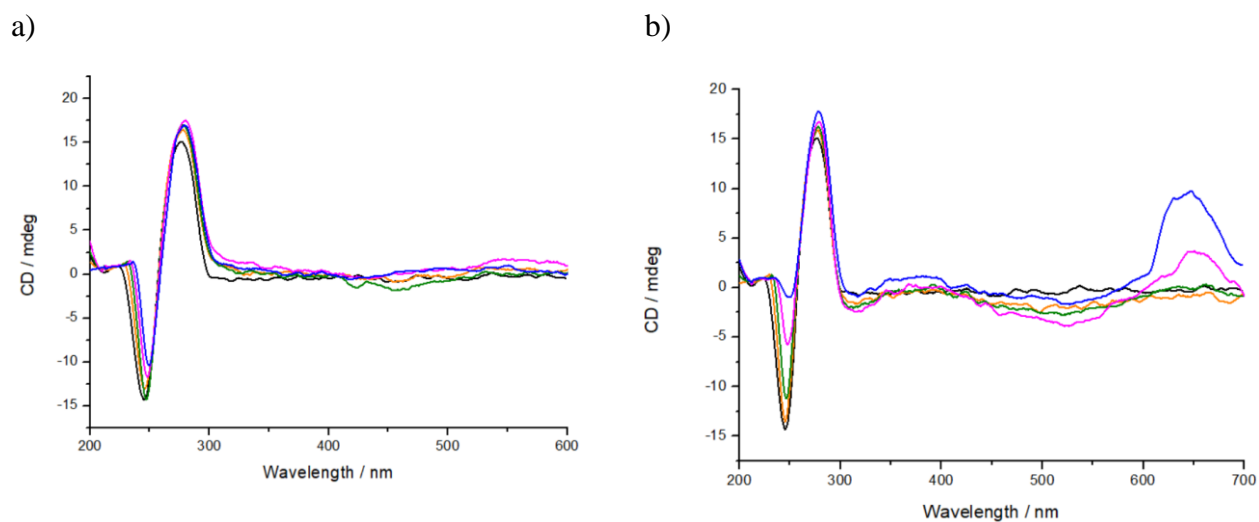

**Figure S21.** Circular dichroism spectra of ct-DNA ( $C_{DNA} = 0.1$  mM b.p.) in the absence and presence of styryl dyes **8a** (a) and **8b** (b) at different LDR  $C_{Dye}/C_{DNA}$ : 0 (black); 0.1 (orange); 0.3 (green); 0.6 (magenta); 1 (blue).

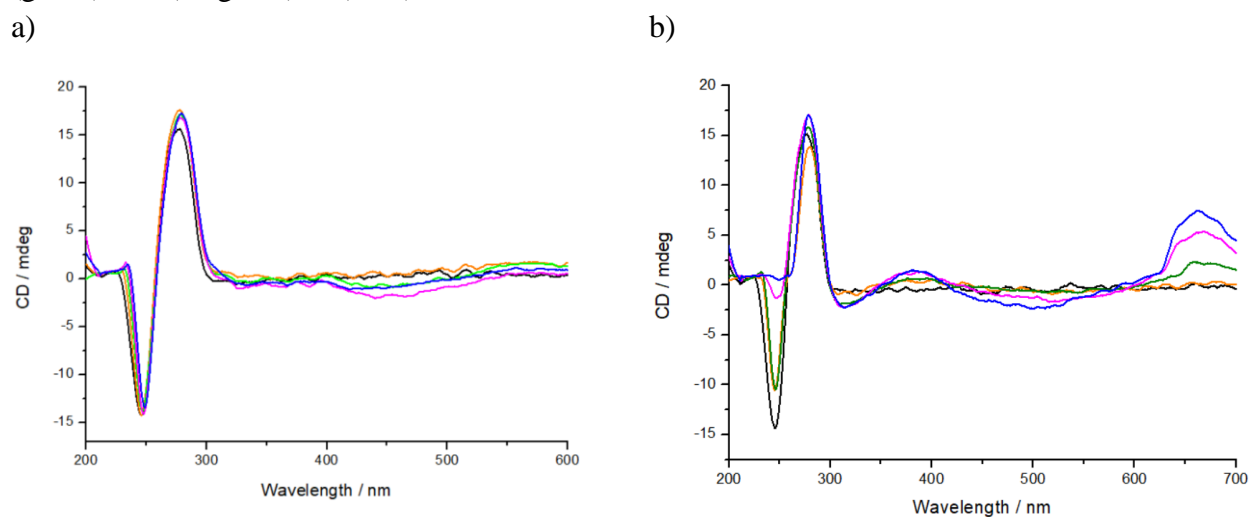

**Figure S22.** Circular dichroism spectra of ct-DNA ( $C_{DNA} = 0.1$  mM b.p.) in the absence and presence of styryl dyes **9a** (a) and **9b** (b) at different LDR  $C_{Dye}/C_{DNA}$ : 0 (black); 0.1 (orange); 0.3 (green); 0.6 (magenta); 1 (blue).

## 5. Cytotoxicity assays

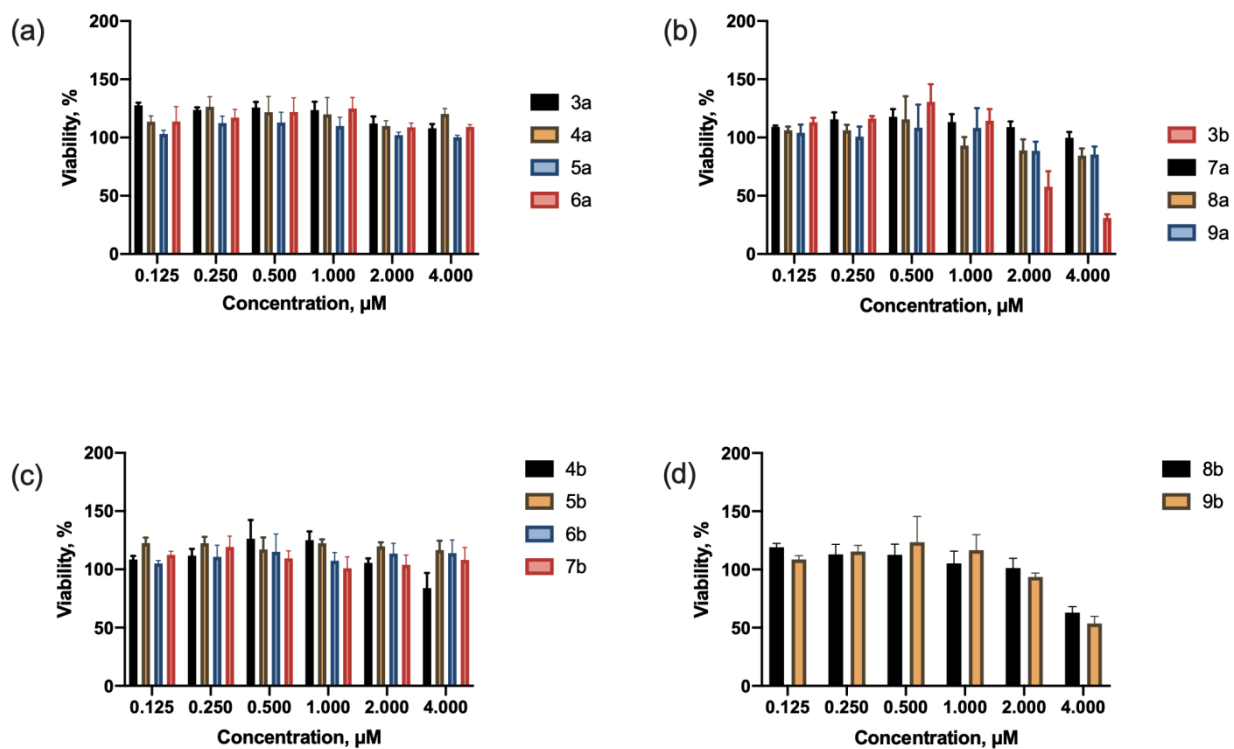

**Figure S23.** Cell survival of HeLa cells treated with different concentrations of **3a-9a** and **3b-9b** dyes (a-d). Data are presented as mean  $\pm$  SD made in three replicates, relative to the control samples.



## 6. Confocal microscopy

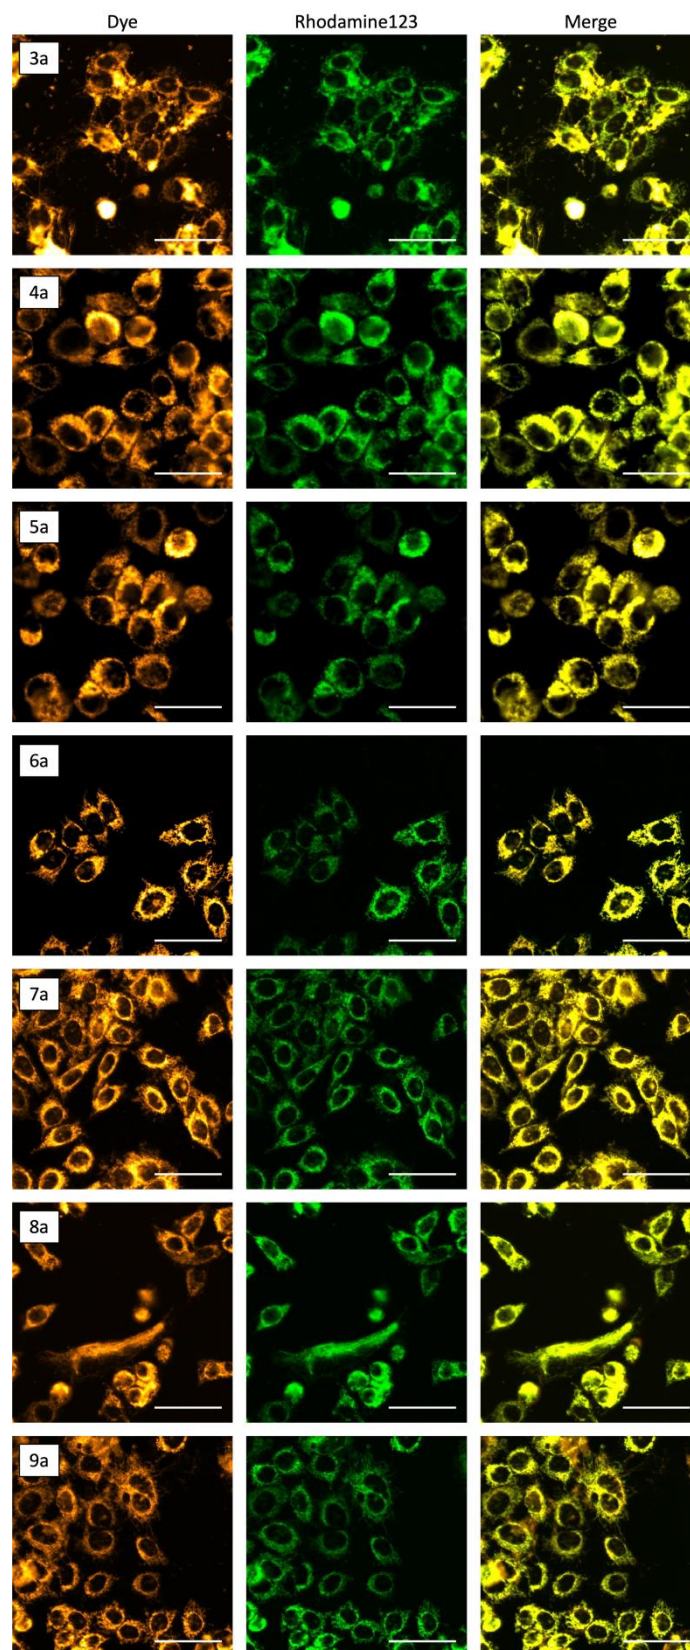

**Figure S24** Fluorescence confocal images of HeLa live cells. Orange hot channel is corresponding **3a-9a** dyes (1  $\mu$ M) ( $\lambda_{\text{ex}}$  = 488 nm, detection 575-625 nm); green channel is corresponding Rhodamine 123 (250  $\mu$ g/mL) ( $\lambda_{\text{ex}}$  = 488 nm, detection 500-545 nm). Laser scanning confocal microscopy, scale bar 50  $\mu$ m.

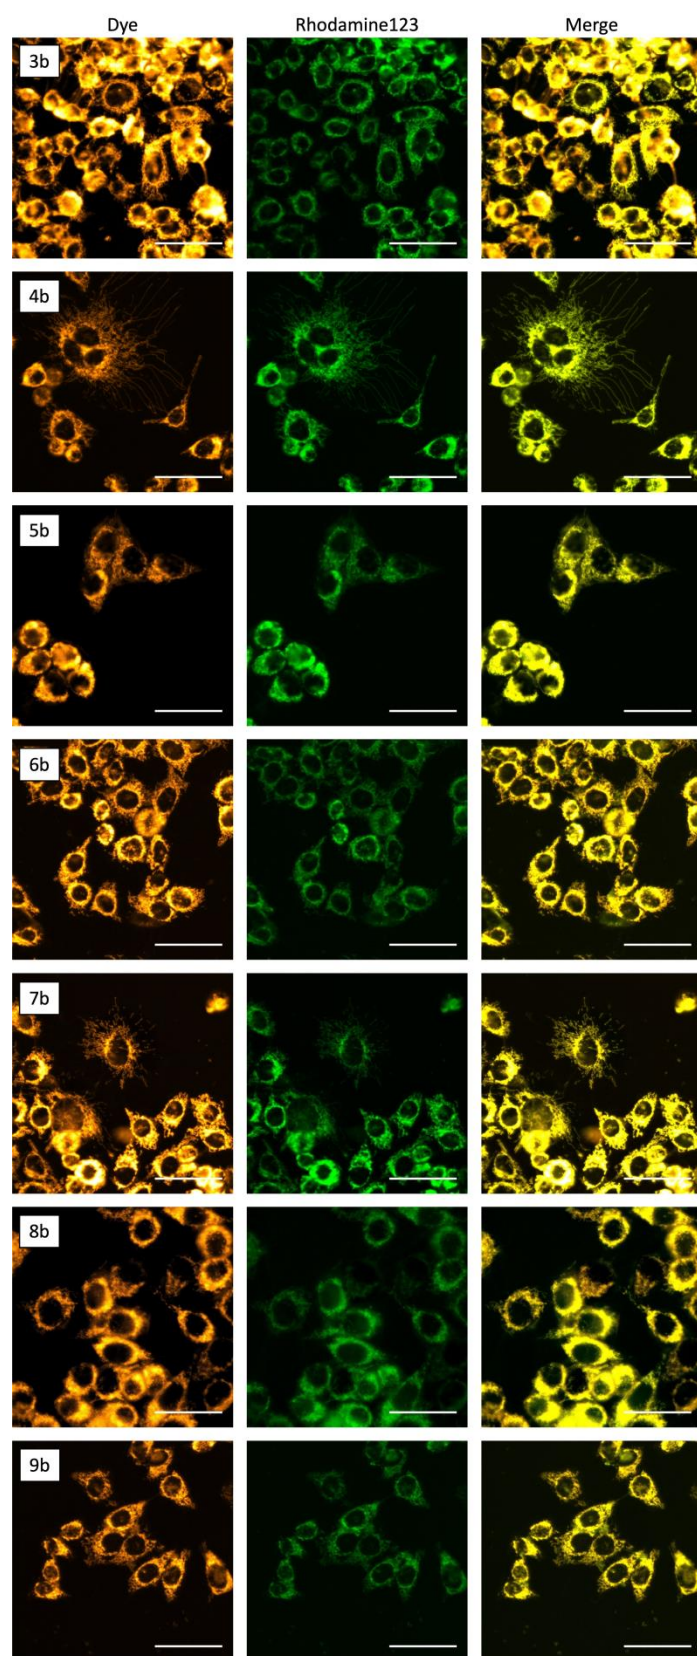

**Figure S25** Fluorescence confocal images of HeLa live cells. Orange hot channel is corresponding **3b-9b** dyes (1  $\mu$ M) ( $\lambda_{\text{ex}}$  = 488 nm, detection 575-625 nm); green channel is corresponding Rhodamine 123 (250  $\mu$ g/mL) ( $\lambda_{\text{ex}}$  = 488 nm, detection 500-545 nm). Laser scanning confocal microscopy, scale bar 50  $\mu$ m.
